# Supplementary material for: Protein restriction slows the development and progression of Alzheimer's disease in mice
Source: Research Square preprint supplement (doi:10.21203/rs.3.rs-3342413/v2), 2024-04-24
Supplement: Supplementary file 1 [file 308d680681ae38ffeba2939e.xlsx]

## Sheet: 1B
Females	Body weight (g)
Months	NTg	NTg	NTg	NTg	NTg	NTg	NTg-PR	NTg-PR	NTg-PR	NTg-PR	NTg-PR	3xTg	3xTg	3xTg	3xTg	3xTg	3xTg-PR	3xTg-PR	3xTg-PR	3xTg-PR	3xTg-PR	3xTg-PR	3xTg-PR
0	26	29.1	27	28	25	33	32	25	30	25	25	37	36	25	25	27	26	37	25	26	30	30	25
1	29	33	29	29	28	34.3	29	30	32	27	29	33	33	33	26	31	30	33	25	27	31.8	30	28
2	31.2	34.1	32.4	31.1	29.2	35.2	27.1	28.2	31.2	26.8	28.1	35.2	34	34	28.1	34.6	29.1	32.2	27.6	28.1	31.2	29	28.2
3	34.2	34.8	33.8	33.1	31.9	36.7	26.9	29.1	30.6	28.1	29.1	36.1	35.5	34.8	29.2	33.2	28.2	31.1	26	27.2	32.1	28.1	27.8
4	34.7	35.1	33.2	33.1	33.6	38.2	26.3	28.4	30.3	28.2	28.7	36.9	36	35.3	29.7	34.5	28.9	30.3	25.1	27.9	32.1	28.9	26.2
5	35.1	34.2	33.9	32.1	34.6	40.1	27.2	28.1	31.2	27.9	28.1	39.1	39.1	35.6	29.8	35.6	29.2	32.7	25.4	27.6	33.2	28.3	27.6
6	35.2	34.6	33.2	33.1	35.9	41.2	28.1	27.2	31.6	28.9	27.2	40.8	41.7	36.7	32.1	36.1	28	33.1	25.8	26.3	34.1	27.2	26.5
7	35.8	34.8	34.1	32.1	35.6	42.2	28.2	28.9	30.8	27.9	28.1	42.1	42.8	37.1	36.2	36.9	27.2	34.9	24.1	27.1	34.1	26.2	25.5
8	35.9	35.2	34.2	31.2	35.2	43.1	27.3	27.9	29.9	25.1	27.1	43.9	44.1	38.2	38.1	37.1	27.1	36.1	25.1	26.2	33.1	25.4	24.4
9	37	37	34	30	37	44	26	28	32	24	26	45	46	40	39	39	26	38	31	26	32	26.2	26.1

## Sheet: 1C
Fat mass in gms
	NTg							NTg-PR							3xTg							3xTg-PR
0 months	8.71	8.64	6.605	7.54	5.06	11.495		13.13	4.755	12.805	6.425	8.64			12.52	7.045	5.595	4.99	12.79			5.85	4.435	5.465	6.34	7.405	6.695	5.94
9 months	12.18	16.185	14.28	10.735	15.915	11.465		6.95	8.59	12.385	5.235	2.535			21.425	20.99	11.895	11.95	15.375			4.425	4.49	18.27	5.94	5.85	8.6	9.95

## Sheet: 1D
Lean mass in gms
	NTg								NTg-PR								3xTg								3xTg-PR
0 months	16.11	18.8	6.605	17.65	16.94	11.495			21.415	17.185	16.16	16.92	20.22				17.065	17.02	18.92	20.205	16.11				17.435	18.92	17.02	17.065	20.18	20.205	14.52
9 months	15.81	28.605	17.62	18.09	18.51	19.34			18.265	17.08	18.65	17.975	21.885				22	22.35	25.67	25.74	21.55				19.235	19.8	17.435	20.52	17.02	20.495	17.81
14N	12.8	17.95	0	0	16:00:22 Sep 28, 2020; 46; ems	1	32.2

## Sheet: 1E
% Adiposity
	NTg								NTg-PR								3xTg								3xTg-PR
0 months	33.5	25.9107	24.463	30.8571	20.24	34.8333			41.0312	19.02	32.95	25.7	19				33.8378	19.5694	22.38	19.96	47.3704				22.5	14.7703	26.78	23.25	21.1333	24.6833	23.76
9 months	34.6487	32.9235	42	35.7833	43.0135	26.0568			26.7308	30.6786	38.7031	21.8125	9.75				47.6111	45.6304	29.7375	30.641	39.4231				17.0192	48.0789	27.7419	17.2692	31.0938	22.6718	22.4138

## Sheet: 1F
Food Intake kcal/ g bw/day
	NTg						NTg-PR						3xTg						3xTg-PR
	0.323684	0.235112	0.3775	0.296154	0.275445		0.560829	0.324752	0.413594	0.40566	0.525084		0.3241	0.498034	0.305607	0.360829	0.324752		0.513594	0.40566	0.525084	0.523684	0.435112

## Sheet: 1G
Protein intake kcal/gbw/day
NTg					NTg-PR					3xTg					3xTg-PR
1.72393	2.19628	1.88372	1.37343	1.60558	1.10644	0.79875	1.03594	0.639	0.816241	1.90256	2.12549	2.9342	1.91313	1.79516	1.01262	0.858455	0.800289	1.03404	1.03542

## Sheet: 1H
Body weight in gms
Months		NTg	NTg	NTg	NTg	NTg	NTg	NTg		NTg-PR	NTg-PR	NTg-PR	NTg-PR	NTg-PR	NTg-PR		3xTg	3xTg	3xTg	3xTg		3xTg-PR	3xTg-PR	3xTg-PR	3xTg-PR	3xTg-PR	3xTg-PR
0		37	33.8	41.3	37.9	34	42.5	39.4		33.5	36.8	36.5	40.2	37.4	38.7		34.5	35	36	26.8		28	36	31	30	35	33
1		38.2	35.1	42.1	39.1	35.1	41.2	38.1		33.9	29	34.1	34.1	37.5	37.2		31.3	36.1	38.1	28.8		30.2	31.7	29.7	26.9	33.5	31.1
2		39.2	37.1	42.7	40.1	37.1	41.2	40.5		32.1	30.5	32	32.8	33.2	36.1		32.6	38.9	38.9	30.8		28.9	31.6	29	27.8	32	28.1
3		39.6	38.1	43.5	40.2	38.1	39.1	41.4		31.2	32.2	32.3	35	31.2	36.5		34.9	39.2	40.1	32.9		26.1	33.1	28.1	26.8	31.1	29.2
4		40	39.2	44.5	41.2	39.2	42.2	41.1		30.6	31.7	33.8	34.1	29.9	39.1		33.9	40.1	39.1	33.7		26.2	32.1	27.1	27.9	32.1	30.1
5		41.2	40.1	43.5	43.1	39.9	43.4	42.1		28.1	32.1	32.1	31.2	30.1	37.8		33.4	41.1	38.2	35.6		25.1	32.9	18.2	29.1	31.9	31.2
6		42.3	41.1	46.1	42.1	40.1	42.1	43.1		29.2	31.2	31.2	31.8	31.1	35.6		37.2	40.9	39.9	36.6		26.1	31.9	19.1	26.8	30.9	28.9
7		44.3	41.8	46.9	42.9	39.1	43.4	42.1		29.9	30.2	31.2	32	32.1	32.1		36.1	40.2	39.2	36.7		26.2	31.2	28.1	25.9	30.2	29.2
8		45.1	42.5	48.1	43.1	39.3	43.1	42.3		30.1	30.1	30.2	33.1	31.1	31.1		37.3	40.1	40.2	36.1		27	32.1	30.1	26.1	29.1	29.9
9		47.2	43.7	49.1	44.2	38.2	43.8	42.9		29.8	30.3	30.1	32.8	30.8	31.2		38.9	40.8	41.1	37.1		25.8	31.6	32.4	27.8	30.1	27.9

## Sheet: 1I
Fat mass in gms
	NTg								NTg-PR								3xTg								3xTg-PR
0 months	14.34	11.895	8.705	11.545	9.35	13.54	10.485		9.685	11	8.665	13.08	12.695	13.735			2.015	4.795	2.14	2.335					1.43	4.285	1.9	10.485	5.06	3.055										3xTg PR
9 months	17.83	17.54	19.535	18.61	14.745	17.055	9.685		7.9	1.72	5.925	4.93	1.41	5.255			6.35	13.425	10.85	11.02					2.625	2.17	4.36	2.12	0.46	1.36										23.27
																																								25.95
																																								28.11
																																								24.81
																																								24.79
																																								25.95
																																								3xTg PR
																																								25.115
																																								27.36
																																								31.455
																																								26.66
																																								25.14
																																								25.385
67	14N	2.73	25.73	0	0	11:20:32 Mar 11, 2021; 44; ems	1	30
68	14N	2.7	25.79	0	0	11:21:36 Mar 11, 2021; 44; ems	1	30
69	15R	1.67	27.78	0	0	11:22:41 Mar 11, 2021; 44; ems	1	31
70	15R	1.71	27.76	0	0	11:23:44 Mar 11, 2021; 44; ems	1	31
71	15N	2.59	23.49	0	0	11:25:39 Mar 11, 2021; 44; ems	1	28
72	15N	2.59	23.47	0	0	11:26:43 Mar 11, 2021; 44; ems	1	28

## Sheet: 1J
Lean mass in gms
	NTg								NTg-PR								3xTg								3xTg-PR
0 months	26.17	23.875	23.435	23.055	22.585	26.18	23.27		22.315	23.48	25.99	24.97	22.67	23.285			21.83	27.915	31.09	31.715					23.27	25.95	28.11	24.81	24.79	25.95
9 months	24.29	28.2	25.61	25.425	26.795	25.78	26.525		25.68	24.86	24.34	26.345	27.9	24.105			27.22	26.455	26.295	26.81					25.115	27.36	31.455	26.66	25.14	25.385

## Sheet: 1K
% Adiposity
	NTg								NTg-PR								3xTg								3xTg-PR
0 months	38.7568	35.1923	21.0775	30.4617	27.5	31.8588	26.6117		28.9105	29.8913	23.7397	32.5373	33.9438	35.491			13.8986	6.11429	6.47222	7.5					5.10714	11.9028	6.12903	34.95	14.4571	9.25758
9 months	37.7754	40.1373	39.7861	42.1041	38.5995	38.9384	22.5758		5.77181	4.65346	17.4585	15.0305	25.6493	18.9904			27.892	27.0098	32.6642	17.1159					5.27132	6.70886	6.69753	1.65468	14.485	9.4086

[truncated: 81 more sheets: 1L, 1M, 2A, 2B, 2C, 2D, 2E, 2F, 3A, 3B, 3C, 3D, 3E, 3F, 3G, 3H, 4A, 4B, 4C, 4D …]
