# Supplementary material for: Protein restriction slows the development and progression of Alzheimer's disease in mice
Source: Research Square preprint supplement (doi:10.21203/rs.3.rs-3342413/v2), 2024-04-24

Females

Figure 6

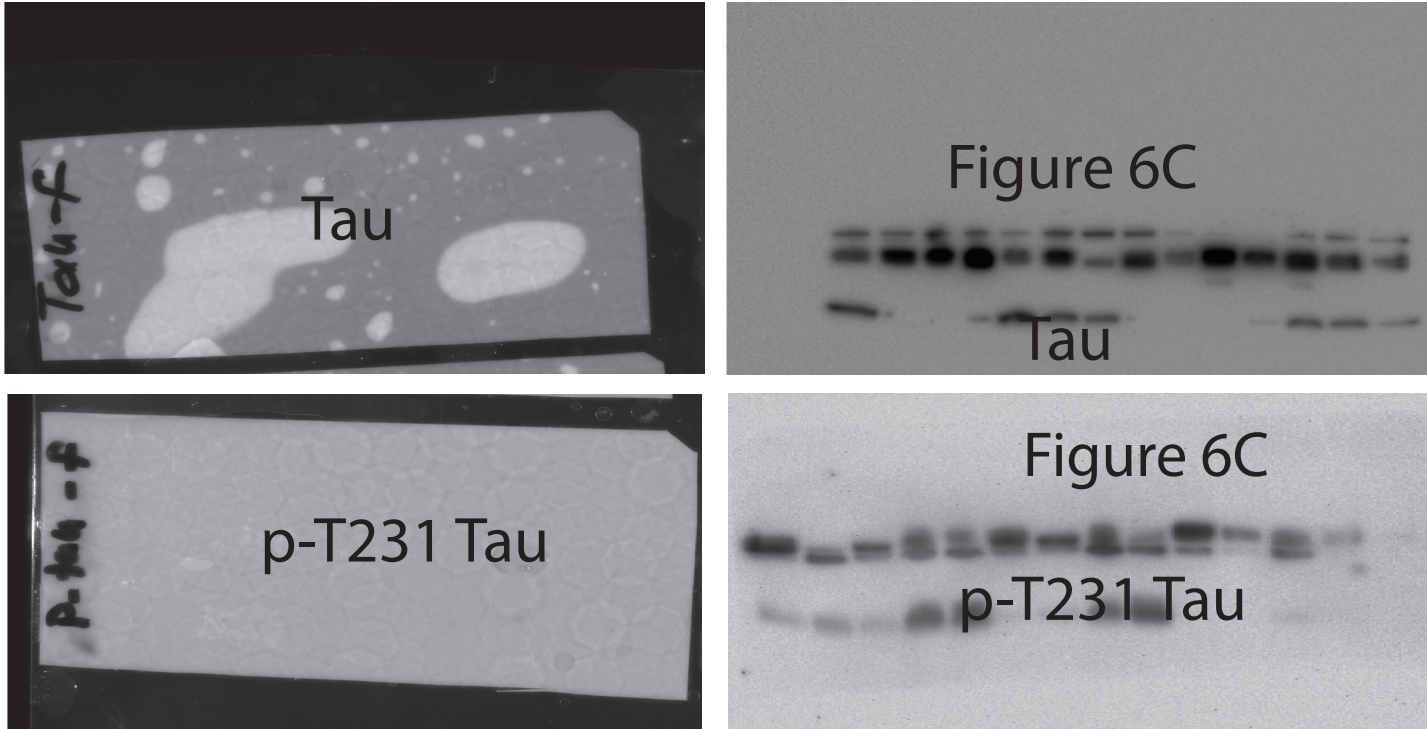

Figure 7

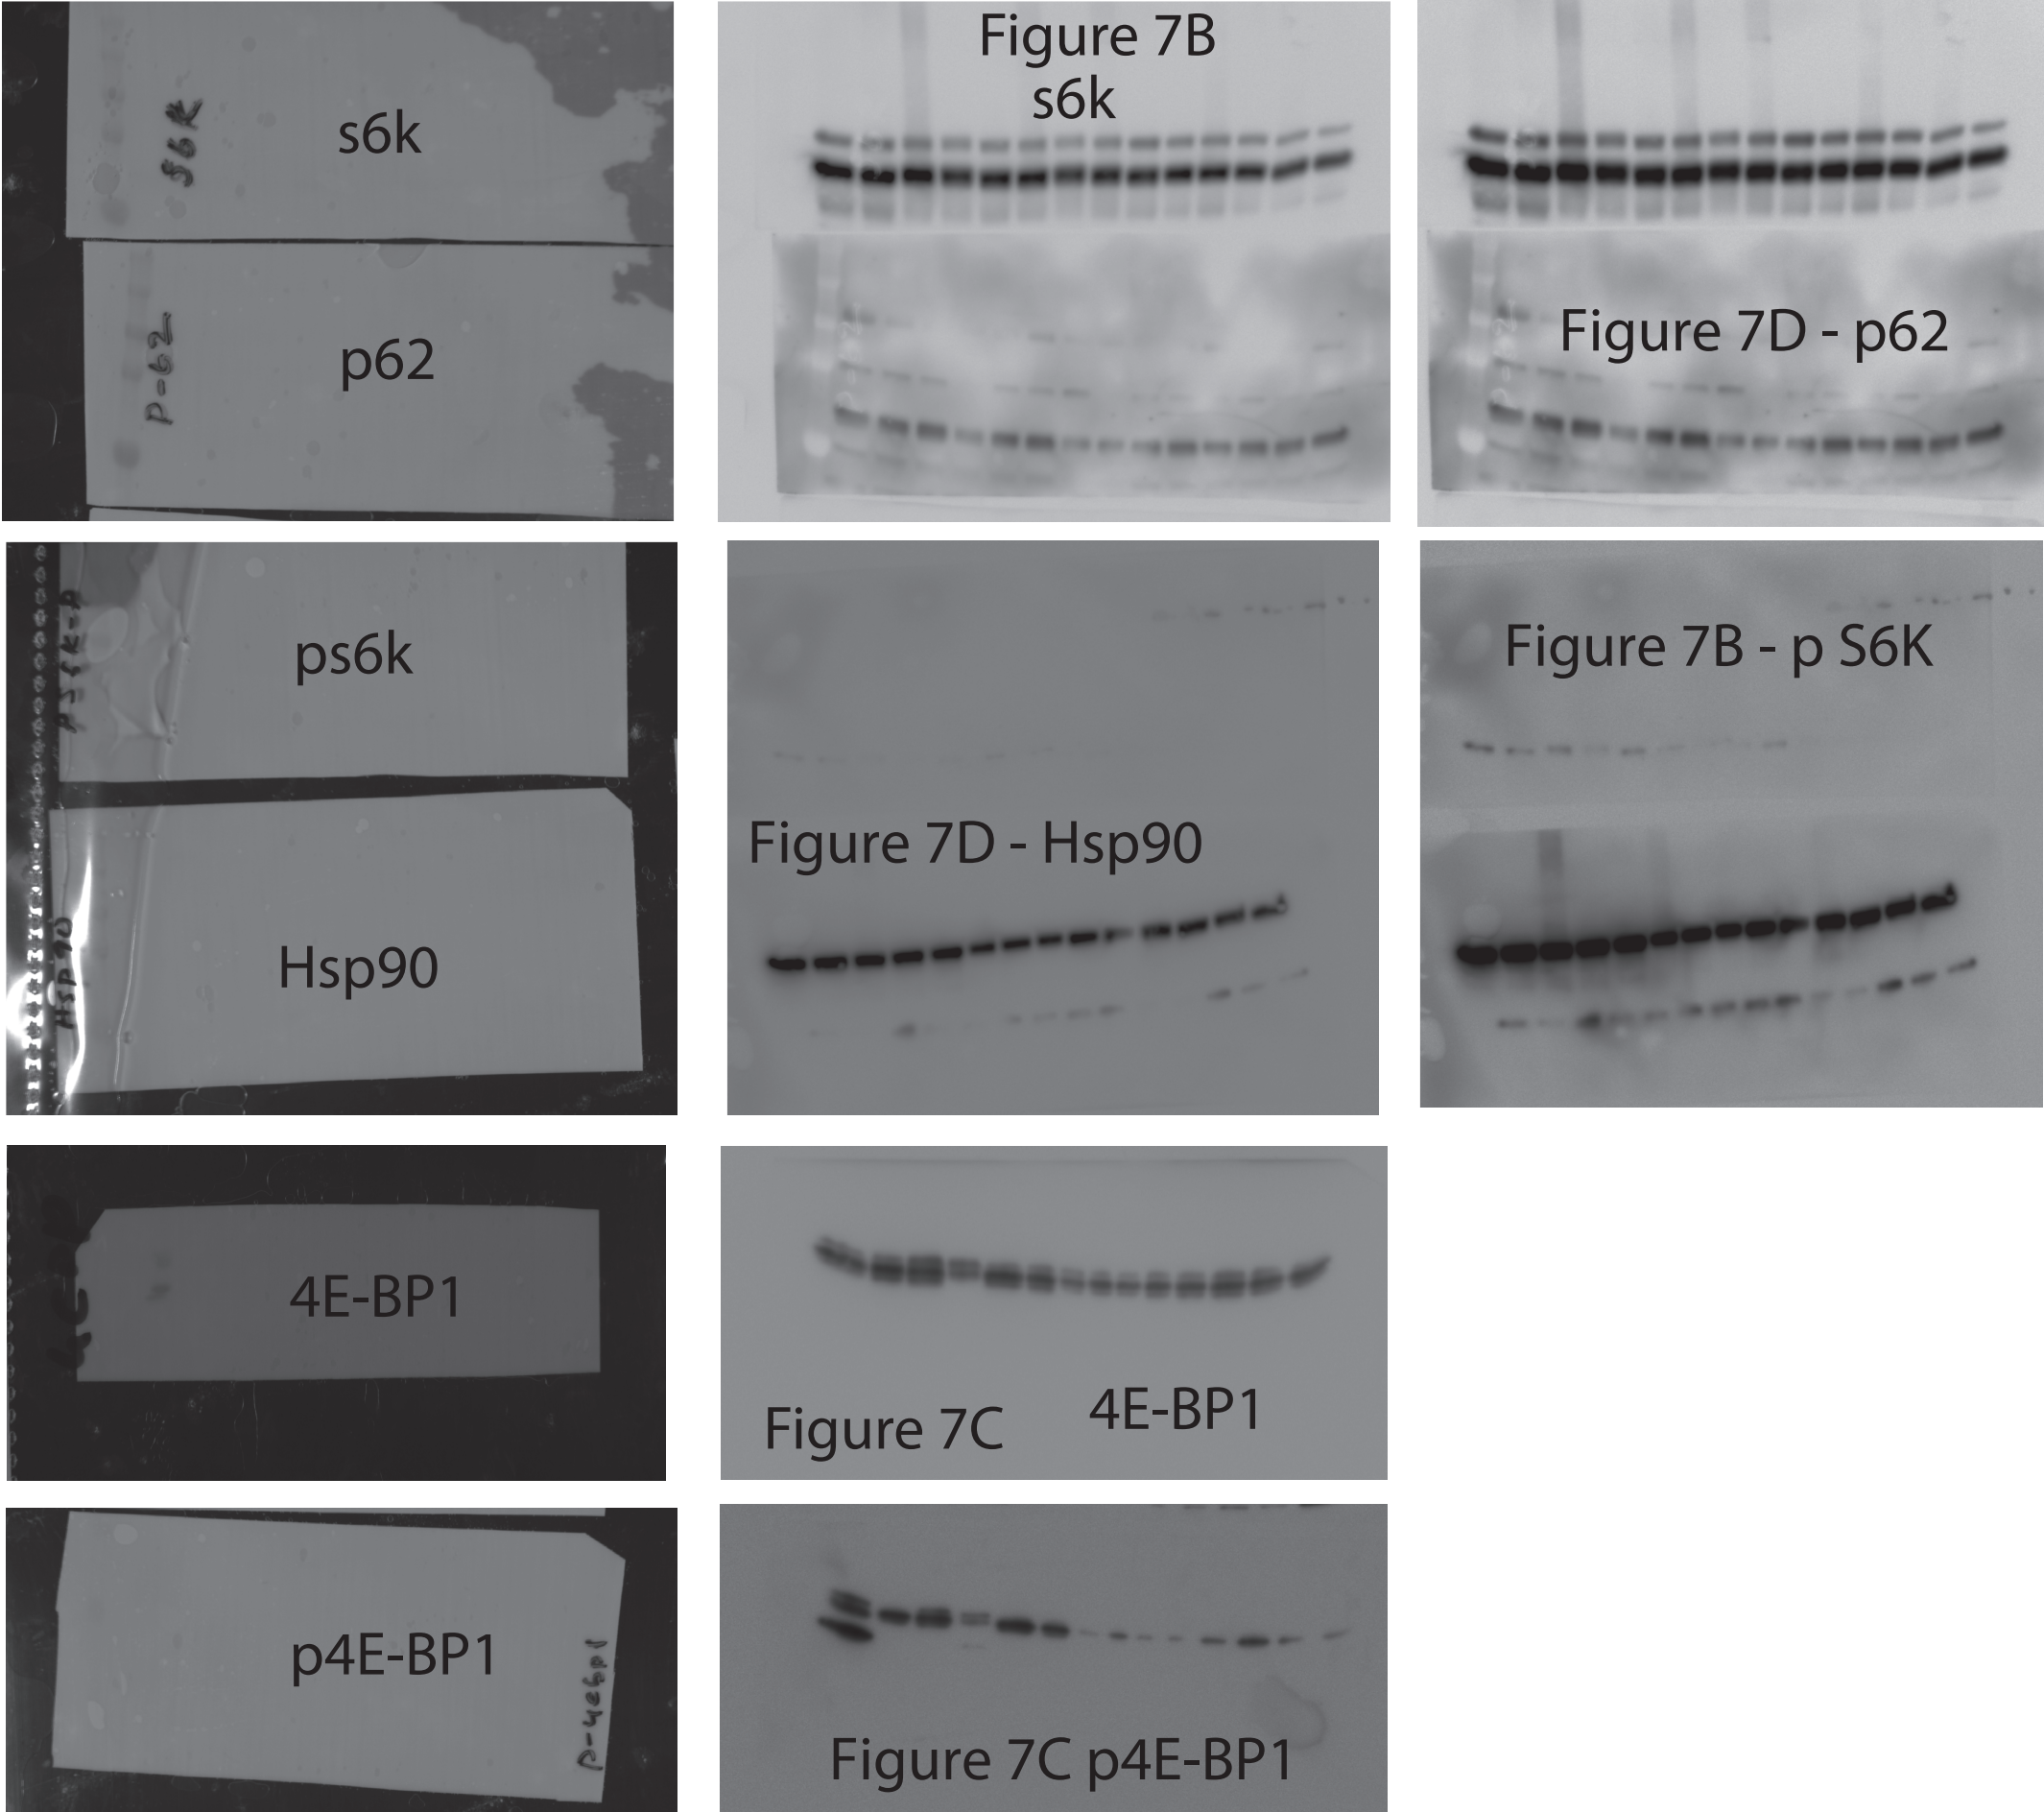

Supplementary Figure 7

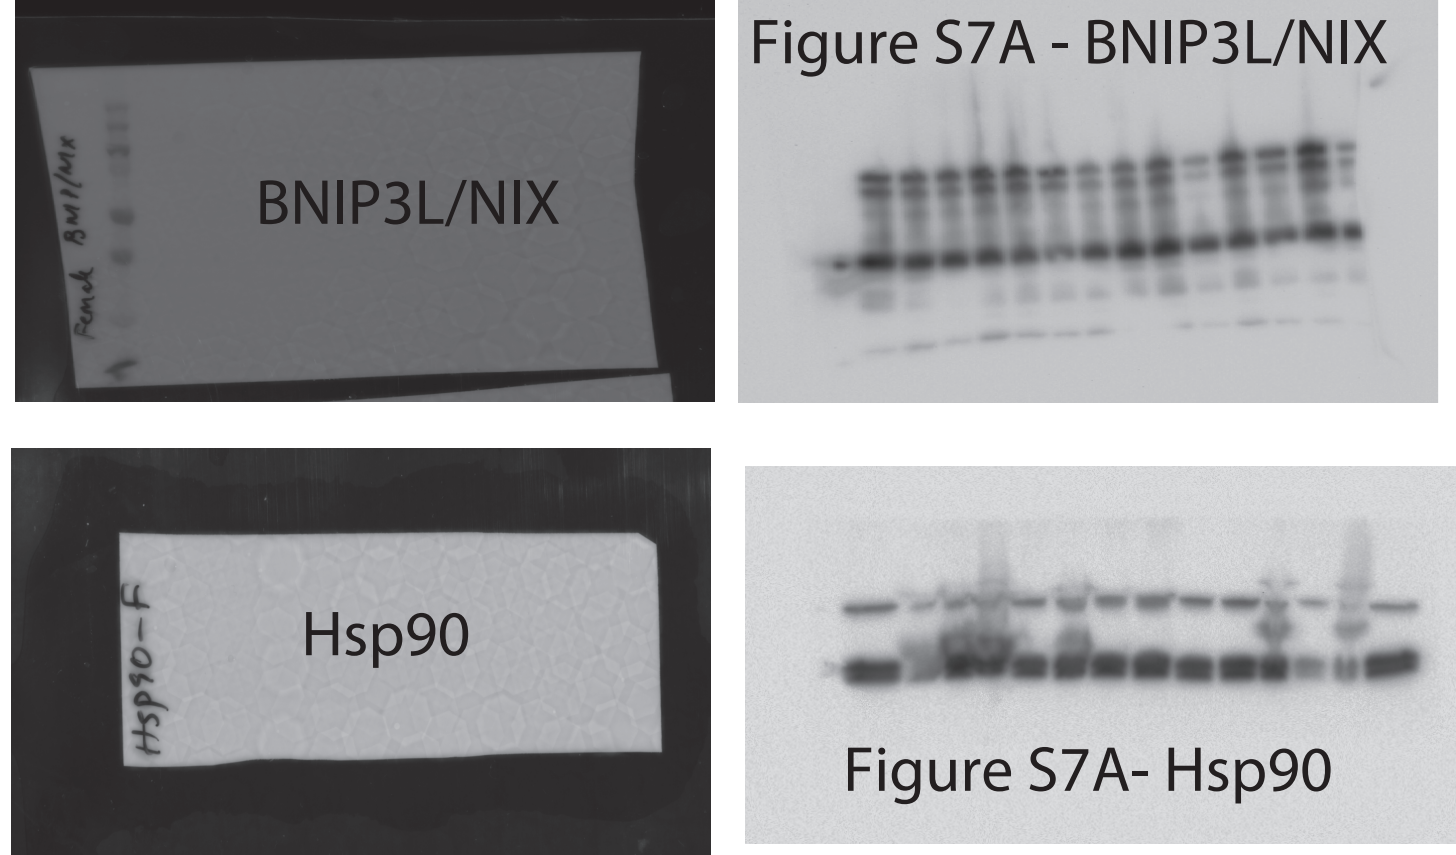

Males

Figure 6A

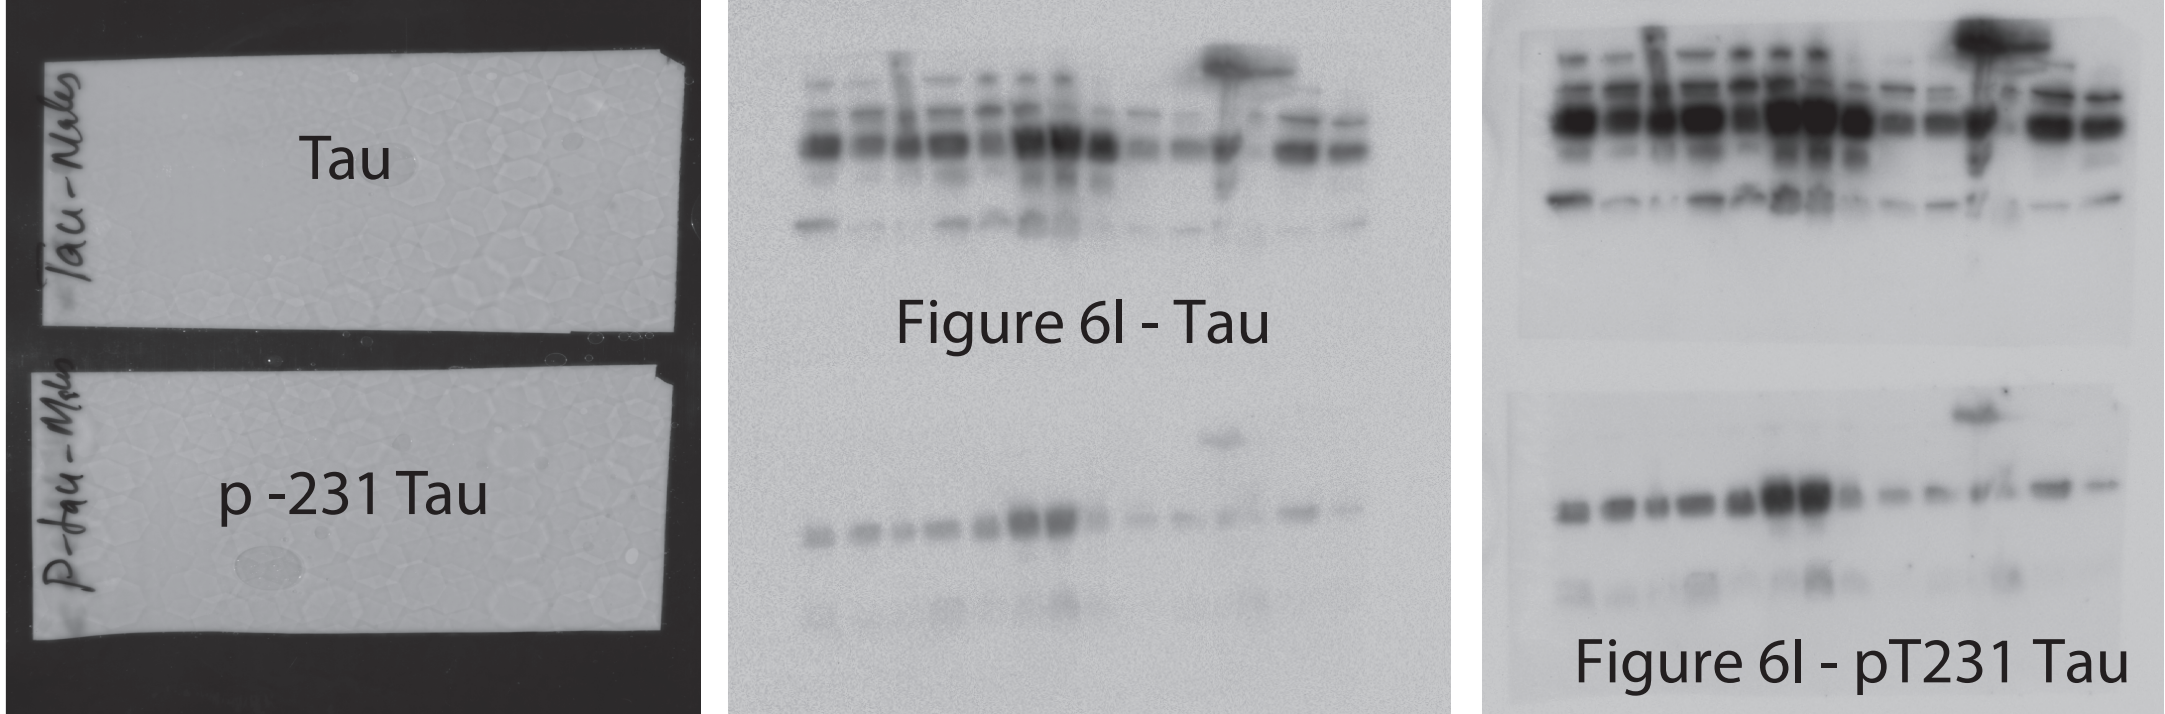

Supplementary Figure 6A

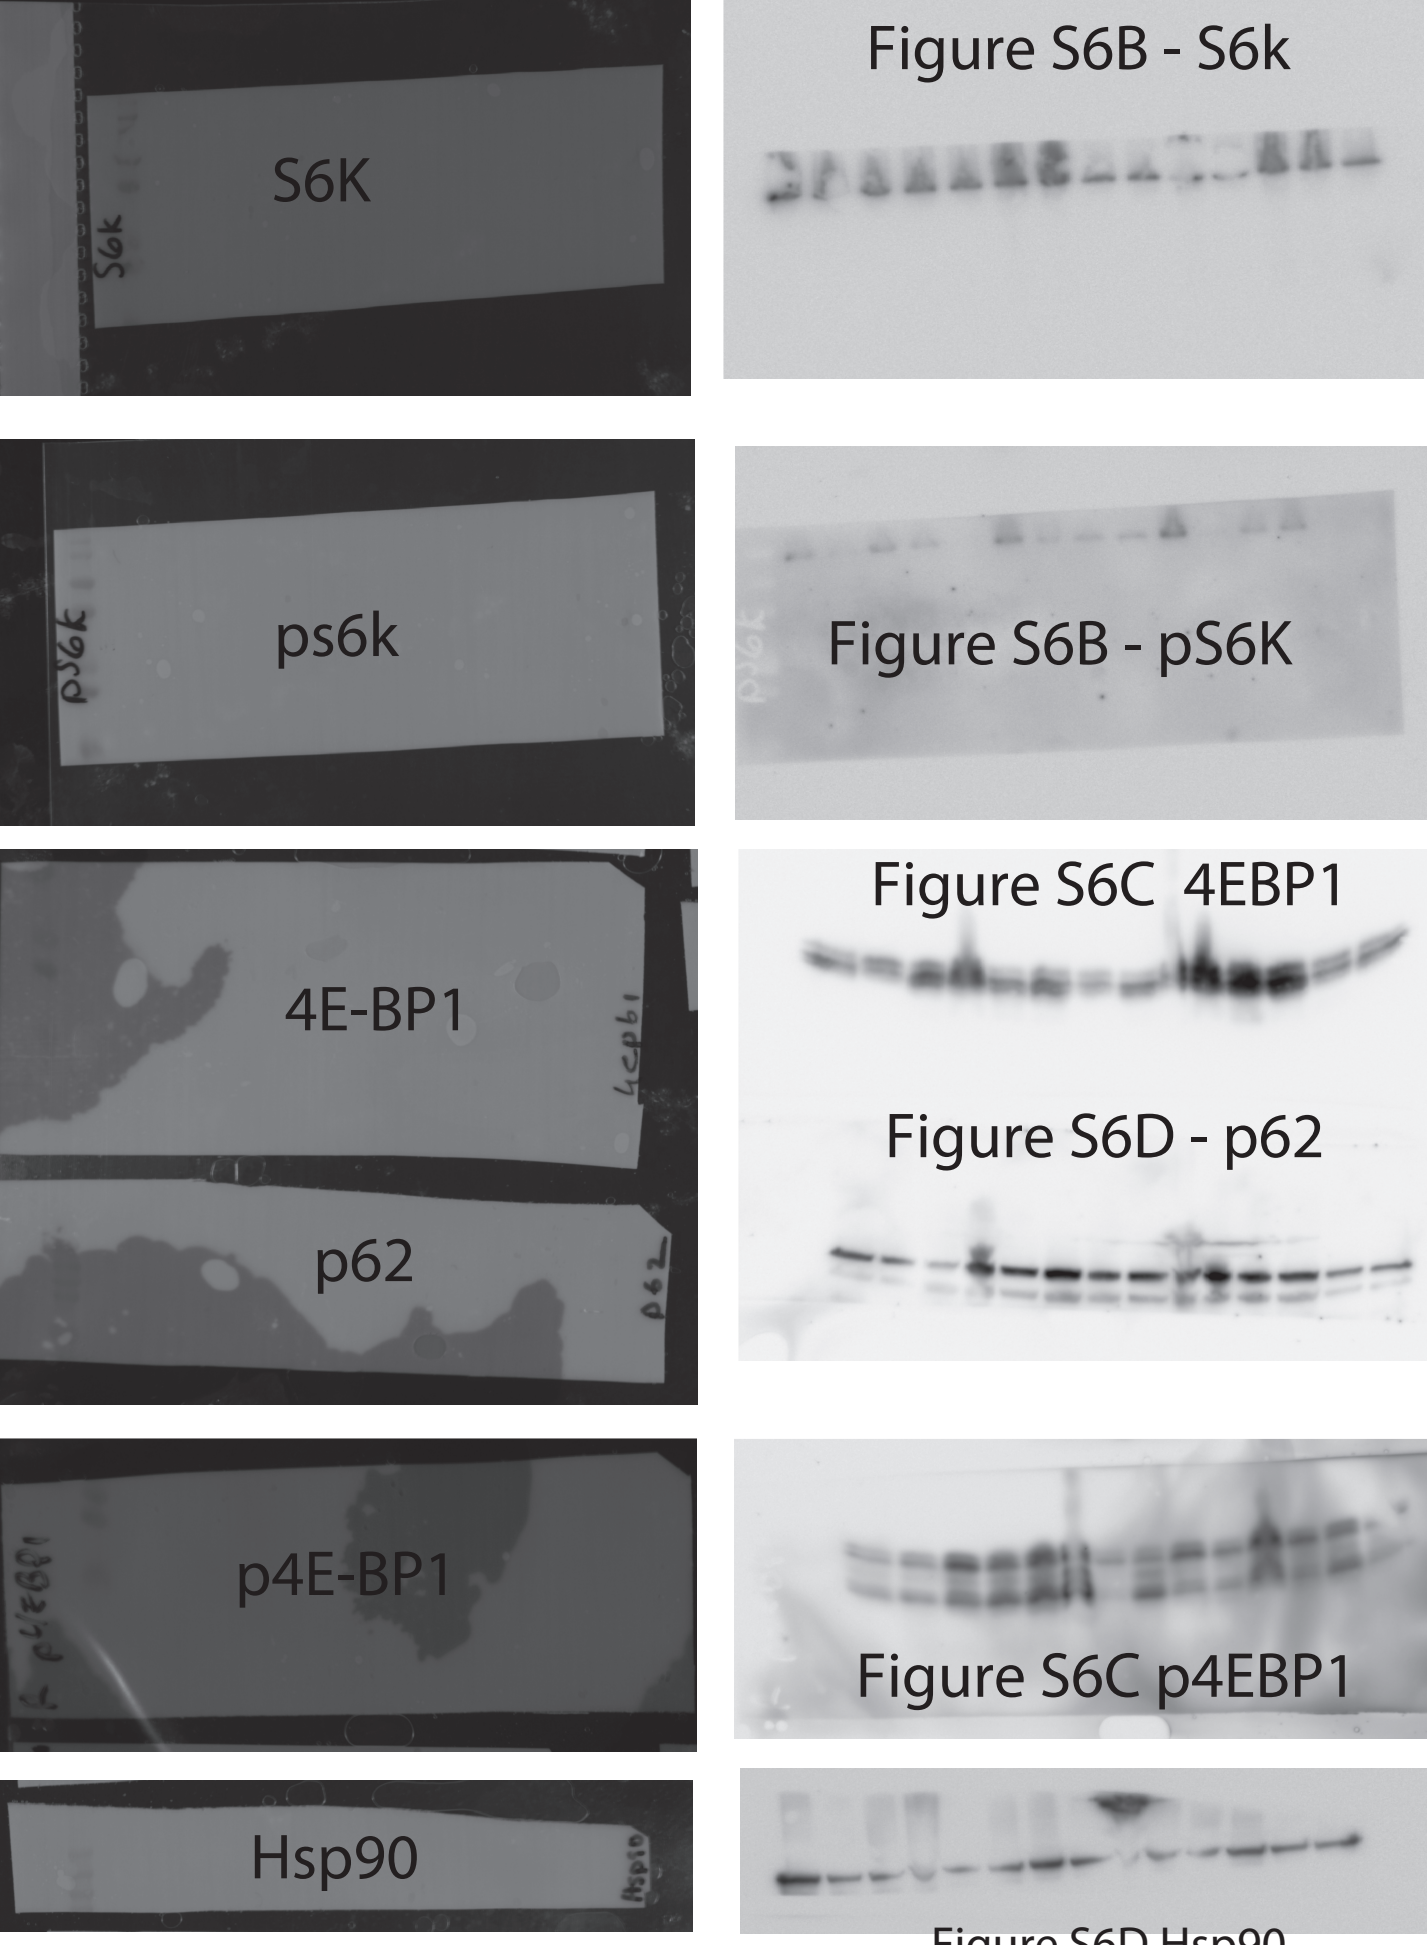

Supplementary Figure 7

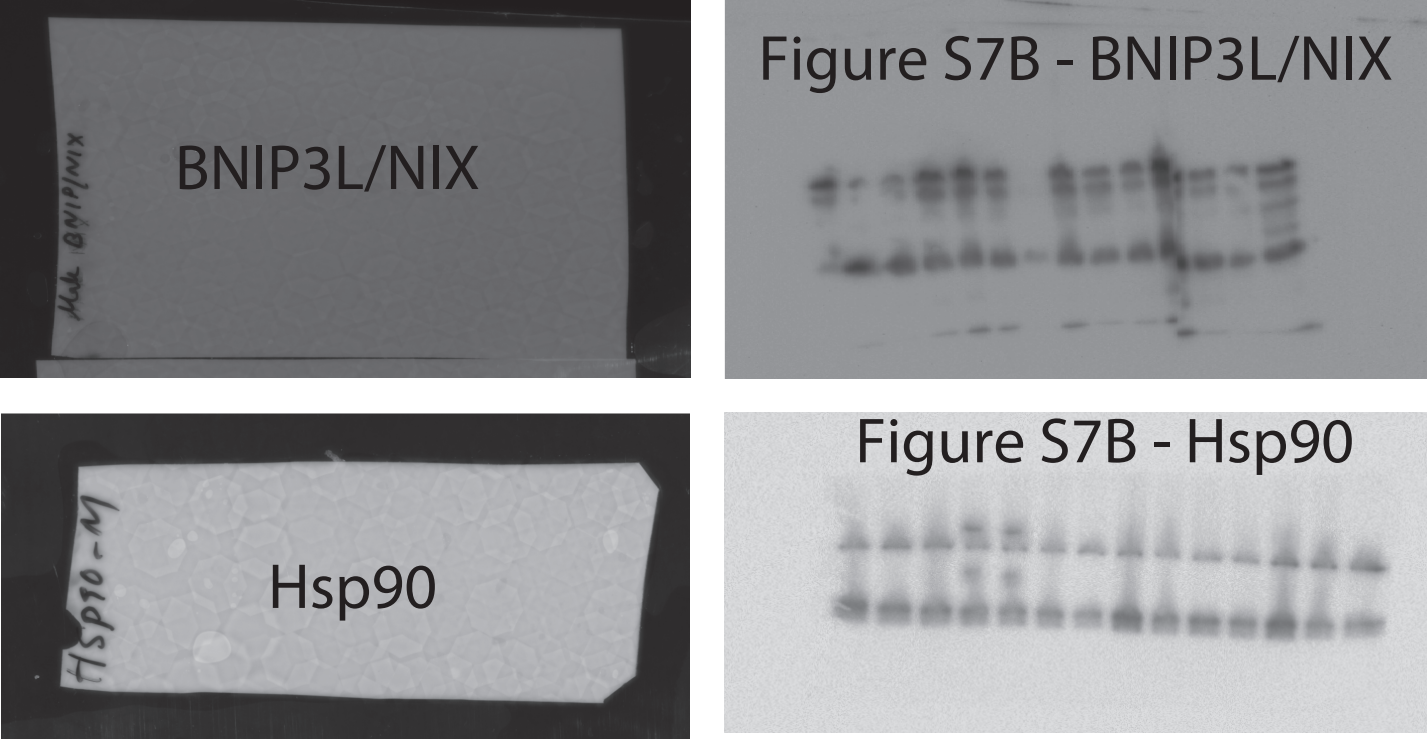

Supplement: Supplementary file 1 [file 57111c8445023b05660ef769.pdf]
