# Supplementary material for: Protein restriction slows the development and progression of Alzheimer's disease in mice
Source: Research Square preprint supplement (doi:10.21203/rs.3.rs-3342413/v2), 2024-04-24
Supplement: Supplementary file 2 [file 7c32527a87950443de59cabd.xlsx]

## Sheet: S1
Diet Composition
Natural Source Diets	Control	Low Protein
Teklad Diet Name	21% Protein Calories	7% Protein Calories
Teklad Diet Number	TD.180161	TD.10192
Colour	Red	Blue
Formula	g/kg	g/kg
Corn	430	430
Whey Protein Isolate	170	35
DL-Methionine 2.0	2	0.4
Corn Starch	150.8	287.4
Maltodextrin	100	100
Corn Oil	32	32
Olive Oil	32	32
Cellulose	30	30
Mineral Mix, AIN-93G-MX (94046)	35	35
Calcium Phosphate, dibasic	8	8
Vitamin Mix, Teklad (40060)	10	10
% kcal from
Protein	21.2	7.1
Carbohydrate	58.8	73
Fat	20	20
Kcal/g	3.6	3.6

## Sheet: S2
Name		Aniline	B-Carotene	Vitamin D2 (Ergocalciferol)	Vanillin	4-Hydroxybenzaldehyde	Theophylline	N,N-Dimethyl-1,4-phenylenediamine	3-2-Hydroxyethylindole (IEA)	N-Acetylserotonin	Indole-3-methyl acetate	3-Hydroxybenzaldehyde	Palmitic acid	Methyl Acetoacetate	Methyl Vanillate	(R)-Salsolinol	Dihydrouracil	Indole-3-Acetamide	2-Hydroxypyridine	L-Nicotine	(S)-1-phenylethanol	Nicotinamide	Pyrazole	5-Deoxy-5-(methylthio)adenosine	Thymine	Thymidine	Uracil	Ketoisovaleric Acid	Caproic acid	Tryptophanamide	Pyridoxine	Pyridoxal	L-Ascorbic acid	Citraconic Acid	Urea	Adenine	Uridine	Glycerol	Itaconic Acid	(R)-2,3-Dihydroxy-isovalerate	Adenosine	Hypoxanthine	Sodium Benzoate	Xanthine	Riboflavin	Creatinine	Allantoin	Benzylazanium	Orotic Acid
f1	NTg	6756.16	2831.97	2029.22	96.4778	17.251	1.1077	1420.27	220.511	25821.1	882.654	1808.31	44.8252	3566.33	6971.43	70.2453	2015.48	18554.5	7614.25	209.424	101024	1.51433e+06	406485	167670	7787.6	3678.18	3936.57	54.4116	115.462	1423.69	3850.81	96317.3	58.2308	330.27	1.59761e+06	1.29796e+06	64279.5	19.2768	51.8426	1.76305	2.09215e+06	1.54511e+06	52.0322	7829.85	3912.83	68.1652	151.698	12080.3	110.066
f2	NTg	2555.6	367.743	4703.46	23.5876	15.0883	0	921.131	206.5	12834.4	831.999	4269.59	26.0135	4418.32	6319.31	108.855	2582.2	28538.9	6790.43	0	115434	3.3538e+06	224771	109306	6859.55	1732.16	1827.75	0	0	465.715	1705.22	48907.6	20.9461	305.005	2.20091e+06	762163	57072.5	12.9594	31.0435	1.5456	3.59948e+06	2.25693e+06	41.4971	8728.48	2138.46	47.4384	83.3114	13785.9	132.112
f3	NTg	1743.77	242.966	2854.08	26.3289	15.5039	0	963.626	145.052	15999.1	672.934	1472.05	30.872	3644.58	6564.17	99.8093	2821.31	12909.6	7526.32	110.113	55997.7	1.98829e+06	226155	121270	5576.73	985.897	1134.91	27.3048	50.1725	671.874	3198.04	89367.7	50.1519	295.855	1.73485e+06	1.08888e+06	57478.6	13.8109	40.9145	3.11791	2.35856e+06	1.3153e+06	44.658	5360.09	2463.01	45.5237	59.8271	13601	127.293
f4	NTg	16869.6	0	0	8.14843	21.244	0	2713.07	229.507	612.673	0	2588.5	0	4576	0	0	7773.68	7877.26	34362.5	0	91645.5	6.96215e+06	1.74399e+06	1922.84	26117.2	80.3698	1548.74	67.4832	361.061	102.86	1835.08	65758.2	12.4635	323.505	4.64502e+06	1.25981e+06	5471.39	11.1153	7.51442	8.14212	659450	1.20681e+06	17.8967	2874.61	10.4092	37.7539	48.6055	23974.4	84.0844
f5	NTg	3341.96	0	0	4.67215	4.61613	0	272.026	4.2591	770.777	0	1057.16	0	2903.86	0	0	2464.97	4668.02	11980.4	0	141970	3.90915e+06	704444	843.578	9053.11	29.7759	1027.91	8.88375	91.4711	167.507	0	3978.38	3.53195	86.4676	2.08166e+06	401251	1358.21	2.22637	0	0.0650146	45626.2	408810	9.38948	766.911	0	17.7325	19.7515	13891.7	27.6471
f6	NTg-PR	10845.4	0	0	0	27.2002	0	1405.2	0	517.879	0	3900.85	0	12621.3	0	0	3349.45	9004.78	37574.3	0	229240	1.11644e+07	2.10615e+06	605.964	25295.6	27.0946	1347.36	16.5019	334.309	40.2849	209.574	23600.1	6.9184	224.286	2.99739e+06	675472	2844.1	10.2352	0	6.4029	25739.5	812516	9.91608	662.209	0	44.8888	42.0566	24813.1	33.9021
f7	NTg-PR	17112.1	542.143	0	48.0885	50.9484	0	1265.59	258.752	12456.8	898.553	4626.03	19.5022	0	9242.33	225.56	2379.88	24512.9	12227.3	164.511	91792.7	4.25312e+06	483210	100960	8162.9	1623.53	1932.7	0	11.602	487.114	2551.11	52472.3	30.6571	409.425	2.58758e+06	630000	58403.7	16.6121	59.7548	0.833819	1.96294e+06	2.4642e+06	48.0823	6072.62	1771.2	45.7624	114.089	15592.5	147.698
f8	NTg-PR	14161.2	0	0	1.29881	39.2968	0	3993.15	253.287	2808.05	0	1819.7	0	8124.76	0	0	13746.4	18305.6	21394.8	0	167333	5.90298e+06	1.32255e+06	2567.95	17672.4	48.6462	1608.07	95.6799	321.745	195.127	1705.25	70055.6	13.1196	257.835	3.30565e+06	1.22406e+06	5799.28	12.6168	53.3589	6.32067	812124	1.19544e+06	61.6431	3208.28	30.559	53.542	74.9584	22238.2	147.814
f9	NTg-PR	1066.48	280.18	0	12.9222	11.6171	1.87906	566.051	115.043	9031.27	522.611	1892.7	3.48253	2157.35	3568.87	19.2666	669.465	14624.4	5407.22	18.5722	99017.7	1.63952e+06	247005	85887	4953.54	2676.63	2331.71	22.6386	46.8398	622.973	688.957	16866.6	11.6693	146.497	1.2676e+06	622272	34743.7	6.96627	21.3003	1.17213	1.63933e+06	1.27546e+06	31.4305	2784.51	832.144	37.6484	122.422	11835.9	65.9454
f10	NTg-PR	14840.7	649.946	0	24.2983	11.4005	0	1362.03	173.405	10795.3	879.487	4728.98	18.873	8280.31	8757.5	130.113	296.589	16692.2	9252.04	0	78863.9	3.68381e+06	375059	90878.2	9174.74	863.819	917.746	6.70656	17.3748	339.328	3234.35	72327.7	26.9215	348.135	1.42406e+06	921822	57204.4	16.286	28.2797	1.68807	4.03854e+06	2.24301e+06	26.5975	3660.31	2261.42	44.2212	99.2249	12613.6	134.917
f11	3xTg	946.519	81.9295	183.526	19.3348	20.8911	2.19394	902.594	178.979	7257.2	442.02	2781.34	16.74	0	4289.67	62.0701	451.324	11246.2	5507.01	0	60331.6	3.01033e+06	144539	112803	3977.61	1985.82	1726.6	0	0	343.496	1984.74	40307.3	29.0879	323.887	2.04256e+06	529814	37339.3	11.8699	13.7154	0.697106	3.56168e+06	1.25462e+06	24.6038	2293.66	986.979	40.498	87.6969	10013	84.0303
f12	3xTg	986.322	385.038	2219.07	4.84094	28.8332	1.22563	695.317	149.565	10844	693.375	804.075	20.5633	15576	4765.44	60.3154	1132.68	14197.7	6213.05	40.9747	112601	1.60196e+06	237708	148815	4466.35	944.127	916.05	19.1203	36.4428	724.398	1463.24	26515.6	24.1839	222.347	1.78817e+06	644010	39586.4	5.59882	25.8565	1.58091	1.32149e+06	1.39739e+06	36.9079	2545.38	830.944	47.7316	46.6352	11436.3	66.4217
f13	3xTg	1153.01	106.042	0	12.0606	15.1263	0	588.732	83.6399	10555.2	488.839	1202.24	0	623.555	2399.7	35.6288	1229.81	10071.1	4955.25	6.99849	110113	1.18482e+06	189337	64451.2	4911.89	1139.43	2037.99	25.3401	64.1463	834.395	1547.12	31300	31.8872	205.807	1.40278e+06	514828	30790.9	6.84536	24.2152	1.26588	1.68571e+06	898557	21.5966	1728.49	295.525	47.0785	67.2656	11162.7	40.6096
f14	3xTg	6824.83	0	0	0.791985	9.55008	0	191.076	0	586.083	0	767.512	0	0	0	0	2361.67	4110.24	6255.82	0	79972.9	2.8436e+06	294734	688.073	3462.22	44.375	1072.02	0	3.40136	54.18	283.787	32088.6	5.44987	114.569	1.71982e+06	536932	1871.67	4.03807	0	0.70503	242267	350288	0	1231.97	0	21.2936	30.5883	11550.5	27.16
f15	3xTg	2321.25	542.222	0	25.4167	11.0939	0	662.721	79.9773	4208.31	936.586	3266.55	24.7843	3452.92	4966.72	23.4674	1605.99	13683.7	8306.13	0	102844	3.76033e+06	203218	90777.2	4506.25	1981.22	1968.91	0	0	540.468	40.4751	12509.2	3.49754	115.225	2.114e+06	756426	36446.2	8.2608	0	1.91032	3.81988e+06	2.10288e+06	58.5654	2638.1	742.907	34.3578	112.043	9218.99	70.1345
f16	3xTg-PR	27028.5	0	0	11.2356	22.0213	0	1455.66	257.145	1055.65	0	2290.22	0	7192.91	0	0	4809.22	8539.39	28998.1	0	191508	8.46179e+06	1.4287e+06	1969.85	24413.3	134.131	2098.92	42.3662	272.359	105.289	383.332	21229.3	8.15432	231.61	2.60343e+06	419505	2170.45	11.7468	23.3099	7.07713	138466	861135	31.7742	801.559	0	37.1845	44.4054	17033.8	41.874
f17	3xTg-PR	1442.23	192.923	0	23.0975	11.719	0	638.995	230.95	11101.1	712.798	3936.93	15.5877	0	3286.67	56.6426	1637.96	18931.4	6441.38	0	96828.3	2.02995e+06	202717	100938	7346.25	7882.5	4203.08	11.5428	20.884	680.633	1585.55	45629.6	35.7048	261.654	943818	439470	37996.8	8.33534	42.3687	1.30053	2.08794e+06	1.37448e+06	25.8829	3848.42	1379	52.5715	349.275	11351.2	117.106
f18	3xTg-PR	2909.11	669.228	43.988	17.6047	56.1806	2.03387	935.161	297.461	8716.42	581.471	3512.35	50.6481	0	5622.16	39.8408	1279.41	15970.2	10603.2	0	121445	4.02727e+06	193785	121487	6490.75	1810.65	1460.26	0	0	283.875	1053.1	11727.3	12.2976	222.139	1.67103e+06	347891	36012.8	8.27703	4.47347	0.321478	3.8855e+06	1.62772e+06	43.8692	1560.53	687.452	46.8461	115.658	11221.6	49.7725
f19	3xTg-PR	1710.1	111.275	0	15.3402	15.8722	0	1081.88	265.213	12840.8	591.465	2370.32	0	4389.17	6662.6	48.2926	3075.47	14979	8468.4	0	127557	3.02074e+06	400443	44937.9	8578.02	1410.21	2375.2	17.298	58.8698	977.726	2130.54	57447.4	29.0337	298.96	1.73786e+06	703139	36851.4	11.6239	34.0427	2.28034	2.8991e+06	1.66754e+06	42.8453	5857.14	355.702	55.0451	98.9694	13124.2	88.0668
f20	3xTg-PR	8613.11	2.59601	0	19.1875	36.7615	4.34766	1446.63	211.657	4443.73	1023.2	2603.56	0	36657.6	6805.08	81.6512	1174.75	16899.8	11883.3	0	180234	4.51014e+06	535419	40078.3	12867.9	944.365	2013.06	54.2055	142.584	905.743	1571.46	33790	18.8033	281.468	2.10867e+06	787444	32185.3	14.0747	46.2929	5.14127	3.17251e+06	2.67599e+06	60.787	4396.87	211.895	64.4184	99.7482	15622.7	82.6813
m1	NTg	2745.82	164.275	0	23.7188	44.3686	0	2140.08	522.725	10349.6	982.197	7649.47	0	18402.4	8959.98	128.29	5406.94	16952.3	18246.9	266.112	99023.9	4.65272e+06	852848	36165.3	14517.8	1271.75	2452.22	17.8822	75.2677	346.789	3116.81	78094.2	35.56	407.722	3.74204e+06	506353	31440	13.791	45.4928	4.74798	4.69701e+06	1.16475e+06	53.206	3465.83	233.084	56.6826	94.4982	17183.7	107.825
m2	NTg	3104.02	369.76	3673.93	28.3398	21.7172	0	1244.43	147.878	15638.9	1355.37	7919.52	34.9787	0	7640.99	83.7558	1615.17	13925.6	8673.74	0	100469	3.48274e+06	434414	139944	8174.59	1384.22	1667.5	51.2886	99.1107	374.696	2819.24	44528.1	42.8782	387.536	2.90766e+06	508602	48641.1	17.6662	59.2335	2.03652	1.89268e+06	1.76731e+06	58.0079	3846.82	1706.99	57.454	81.454	17067.6	130.277
m3	NTg	20825.4	0	0	23.0664	16.8559	0	2669.77	403.323	11099.8	54.8118	19410.7	0	12168.2	1939.55	59.444	8277.52	24949	21287.4	0	246201	7.20713e+06	1.34839e+06	12613.1	20516.4	409.714	3823.75	79.8291	295.829	656.976	3886.23	115400	51.2932	533.53	4.15077e+06	1.74709e+06	24038.3	23.3693	58.3031	4.37756	1.61644e+06	2.97343e+06	83.6748	7360.99	138.532	100.231	168.939	42217.6	245.608
m4	NTg	2242.08	260.213	0	21.7327	27.351	0	1667.83	247.242	16704.3	975.836	6700.06	0	9393.59	8524.63	236.379	1300.21	19027.2	9753.45	26.4022	124332	3.76768e+06	446845	83062.7	9182.79	2601.56	2332.35	31.922	79.2702	745.134	2848.2	51600.8	32.0199	359.928	3.13826e+06	743896	46332.3	19.7027	42.8833	3.08688	3.4628e+06	2.31021e+06	57.209	5349.31	797.101	62.0118	256.89	13515.7	132.12
m5	NTg	2176.51	309.677	2767.45	27.2203	56.919	2.77491	1458.26	185.044	12525.2	735.972	5182.5	24.3561	6035.89	7992.76	103.005	5010.47	13763.4	9354.52	0	137289	3.78498e+06	298846	138887	7261.51	1420.05	1735.23	15.1651	27.6099	301.458	2126.62	44252.6	22.9125	322.032	3.03206e+06	830149	47538.8	11.7617	34.661	1.68864	3.8879e+06	2.00983e+06	76.6124	3019.96	1329.45	49.81	112.387	12183	93.897
m6	NTg-PR	7135.19	239.28	0	14.3082	11.2865	0	636.847	189.706	5402.35	557.553	3574.72	21.2153	226.027	6134.49	140.21	2439.59	8371.93	7412.4	0	42636.4	1.90459e+06	261818	51540.4	5558.04	530.974	736.64	3.70154	6.02392	247.016	1203.94	21860.4	14.1802	182.926	1.64645e+06	259576	20221.5	8.35831	22.9322	1.46352	2.08938e+06	1.03694e+06	18.5576	1805.49	557.859	23.922	47.1967	6529.98	50.7857
m7	NTg-PR	1729.26	429.393	2723.04	19.924	53.8229	1.08108	936.642	200.173	10400.5	635.474	6239.26	29.3171	11019.7	6647.58	95.4306	3197.26	10868.1	7182.14	28.5871	117103	2.48872e+06	262117	157739	6140.17	1009.77	1042.97	40.3009	78.1367	926.376	1740.99	30922.5	17.8614	240.581	1.8497e+06	1.22921e+06	61714.5	8.11124	47.2166	2.19277	887371	1.82222e+06	52.2263	4861.72	1462.67	52.081	89.3898	13357.3	69.959
m8	NTg-PR	2447.56	511.807	0	18.1489	19.0858	4.50217	1767.43	315.111	11914.9	1325.89	14812.3	0	7769.35	10585.3	226.042	5206.65	14844	13995.8	45.2625	131326	4.18188e+06	649224	93778.3	12601.8	1341	2100.04	30.4129	65.1875	425.701	2831.73	66156	29.6758	366.455	2.28218e+06	720764	48610.1	17.3936	20.1325	2.59239	4.10195e+06	2.3951e+06	46.7827	4353.15	758.258	52.3521	176.47	13258.4	108.255
m9	NTg-PR	1528.87	256.809	1073.22	26.8504	18.7106	1.53802	1116.77	11.1914	16303.7	890.542	6446.23	34.832	15166.2	7319.19	72.3676	1139.08	10557.2	5501.59	0	130907	2.51907e+06	289283	146821	5114.69	1668.87	1823.71	29.7154	60.1064	904.211	2649.69	62638.8	46.9432	347.9	1.74999e+06	1.01507e+06	73952.1	11.044	45.0827	2.45862	2.54377e+06	1.66129e+06	58.2727	4599.79	1865.95	77.5219	111.029	16085.8	77.5945
m10	NTg-PR	0	0	0	0	4.2958	0	0	0	0	0	4921.54	0	0	0	0	1068.38	2360.37	6803.36	0	70978.2	4.32964e+06	451643	25.8001	0	0	604.755	0	0	24.3658	0	13226.1	1.47533	97.9989	1.17283e+06	369621	1389	1.51214	0	0	0	447527	0	1060.12	0	16.1532	32.1937	8090.28	23.9136
m11	3xTg-M	3823.57	165.074	0	43.1335	21.5497	0	2248.25	518.77	8337.81	1364.8	8459.16	0	35103.7	9453.75	177.72	7394.31	27731.5	20523.9	0	114148	6.09308e+06	891068	58291.6	19015.9	2453.11	5927.57	68.7531	186.208	556.836	2854.36	34939	23.4183	414.592	3.3858e+06	821710	40196.4	15.3322	59.3324	8.28886	6.38901e+06	1.99131e+06	220.307	4658.67	374.811	51.9942	411.885	5291.25	195.275
m12	3xTg-M	1841.78	317.321	1301.71	30.7971	26.533	0	686.8	243.541	10512.4	791.834	1969.04	36.4102	4150.94	5342.77	84.7627	3580.8	16068.5	5806.09	0	113107	1.58967e+06	215128	173870	5504.09	1859.02	2521.15	56.4676	111.719	850.457	1347.11	35831.1	25.7586	237.367	1.51643e+06	615458	39799.7	5.95182	34.5651	1.30053	2.07406e+06	1.20642e+06	53.5787	2848.14	1195.74	48.4295	87.4416	13140.5	70.6937
m13	3xTg-M	1907.62	211.604	276.631	18.023	16.5293	1.21155	914.034	272.767	15649.5	793.099	1153.42	40.7675	10175	5388.1	76.2046	2757.91	16759.2	7242.05	0	103974	2.01483e+06	258139	157679	5478.73	1579.75	1929.73	38.7991	78.3726	662.742	1310.39	46056	42.04	296.262	1.35741e+06	583618	42030.5	7.11488	33.6504	2.20823	2.00352e+06	1.3969e+06	41.6183	3654.94	1801.77	57.2309	127.749	9089.1	86.7205
m14	3xTg-M	1861.29	364.412	317.925	30.7982	51.035	0	1552.03	360.071	10960.6	978.986	16885.5	50.1282	2908.89	9341.09	156.353	1261.48	13126.1	10205.4	0	66654.5	2.88929e+06	296686	156422	8619.76	3514.95	2960.87	53.4023	101.77	623.579	2989.22	57342.8	45.3168	387.858	1.78271e+06	776852	50598.4	12.2635	62.2502	1.05543	3.33037e+06	1.33379e+06	57.8645	5048.79	1765.75	71.9649	123.557	16876.9	128.929
m15	3xTg-M-PR	17202.3	0	0	19.9684	48.5704	1.78921	2184.89	421.133	8129.68	1014.72	8300.59	0	15485.5	9848.88	152.65	4834.76	13975.6	22365.8	0	154188	5.34879e+06	1.07854e+06	21407.9	18448.5	949.764	3256.26	69.5713	199.567	454.052	2256.1	36333.7	24.2258	349.751	2.99956e+06	778094	19587.8	11.2433	55.6701	5.11464	2.6315e+06	1.58921e+06	80.4297	3465.16	49.3157	79.3553	109.579	19730.6	82.1133
m16	3xTg-M-PR	24553.5	0	0	11.4593	40.4864	2.5416	2020.37	300.557	1038.12	0	20026.7	0	19236.9	0	0	7007.88	5949.69	35659.1	0	204014	1.05247e+07	2.16043e+06	873.386	31166.7	206.258	3371.07	72.8174	471.765	154.413	753.026	26085	11.3597	307.437	3.51496e+06	1.03264e+06	3171.47	14.1011	29.0535	3.72281	296222	905408	44.858	1876.58	0	53.4844	97.2556	27229.5	69.4736
m17	3xTg-M-PR	5144.48	0	0	6.30054	11.0441	0	670.817	0	636.299	0	948.549	0	3464.13	0	0	4083.23	4668.8	19320.6	0	142414	6.25777e+06	1.33993e+06	556.646	14362.2	30.5784	1875.37	18.1612	212.52	96.6339	488.181	43324.6	9.95594	180.562	3.68579e+06	1.03667e+06	1915.89	9.02198	0	5.36902	66423	557486	17.2846	1049.59	1.87886	46.7431	27.901	22428.1	40.1539
m18	3xTg-M-PR	980.61	75.2782	0	3.44324	18.0698	0	779.881	277.664	5036.04	493.832	2717.5	0	0	2812.14	100.498	6395.2	14980.5	4603.61	162.624	89850.2	3.06628e+06	184071	27373.5	4255.41	680.268	1123.63	0	16.9357	295.969	1690.88	47659.3	13.379	203.532	1.40533e+06	453618	26560.6	10.5962	13.9354	2.76542	2.36463e+06	1.76186e+06	22.3578	2708.18	263.522	31.9314	60.2374	8205.28	137.981
[truncated: 146 more columns]

## Sheet: S3
3xTg-PR/3xTg		Females					3xTg-PR/3xTg		Males
	FC	log2(FC)	raw.pval	#NAME?				FC	log2(FC)	raw.pval	#NAME?
3-2-Hydroxyethylindole (IEA)	2.4843	1.3129	0.0015734	2.8032			dGTP 2-Deoxyguanosine 5-triphosphate	0.18265	-2.4528	0.00080454	3.0945
D-Pantothenic acid	3.4949	1.8053	0.003017	2.5204			Creatine phosphate	0.17393	-2.5235	0.0011802	2.928
cis-Aconitic Acid	27.08	4.7591	0.029722	1.5269			SAH S-Adenosyl-L-homocysteine	0.11375	-3.1361	0.0013427	2.872
4-Methylaminobutyrate	2.1899	1.1308	0.04559	1.3411			Inosine triphosphate	0.11976	-3.0617	0.0015805	2.8012
3-Methyl-L-Histidine	2.0926	1.0653	0.047725	1.3213			Phosphocholine	0.1847	-2.4367	0.0018136	2.7415
Thymine	2.7994	1.4851	0.049301	1.3071			DL-2-Aminoadipic acid	0.13462	-2.8931	0.001827	2.7383
							B-Carotene	0.1138	-3.1355	0.002883	2.5402
							dGMP 2-Deoxyguanosine 5-monophosphate	0.081893	-3.6101	0.0035674	2.4476
							Uridine	0.2968	-1.7524	0.0037091	2.4307
							5-Deoxy-5-(methylthio)adenosine	0.091918	-3.4435	0.0039155	2.4072
							D-Fructose 6-phosphate	0.038694	-4.6917	0.004031	2.3946
							Cytidine	0.14975	-2.7393	0.004915	2.3085
							Phosphonoacetate	0.082565	-3.5983	0.0058789	2.2307
							Tryptophanamide	0.37164	-1.428	0.0059209	2.2276
							trans-Aconitic Acid	0.065276	-3.9373	0.0064362	2.1914
							N-Acetyl-D-galactosamine	0.25262	-1.9849	0.0067432	2.1711
							cAMP Adenosine 3-5-cyclic monophosphate	0.073945	-3.7574	0.0068213	2.1661
							N-Acetyl-L-Alanine	0.25924	-1.9476	0.0068799	2.1624
							L-Cystine	0.357	-1.486	0.007265	2.1388
							Thymidine	0.19846	-2.3331	0.007577	2.1205
							Hypotaurine	0.49064	-1.0273	0.0076138	2.1184
							S-2-Aminoethyl-L-cysteine	0.07218	-3.7923	0.0080328	2.0951
							Guanosine monophosphate	0.062761	-3.994	0.0081611	2.0882
							Trigonelline	0.068963	-3.858	0.0093009	2.0315
							NADH	0.052882	-4.2411	0.010633	1.9734
							Riboflavin	0.061325	-4.0274	0.012022	1.92
							Succinic Acid	0.073339	-3.7693	0.012225	1.9128
							O-Phospho-L-serine	0.10773	-3.2146	0.014523	1.8379
							Guanosine	0.14413	-2.7945	0.015683	1.8046
							Deoxycytidine	0.16646	-2.5868	0.016529	1.7817
							N-Acetylserotonin	0.32644	-1.6151	0.017314	1.7616
							Vanillin	0.3354	-1.576	0.01751	1.7567
							Carnosine	0.12981	-2.9456	0.018739	1.7273
							2-4-Quinolinediol	0.33741	-1.5674	0.019621	1.7073
							2-Deoxyguanosine	0.18329	-2.4478	0.019657	1.7065
							DL-Methionine sulfoxide	0.35327	-1.5012	0.020411	1.6901
							Citicoline	0.055006	-4.1843	0.023226	1.634
							L-Ascorbic acid	0.43154	-1.2124	0.023703	1.6252
							Sarcosine	0.0582	-4.1028	0.023758	1.6242
							CDP-ethanolamine	0.0029581	-8.4011	0.023989	1.62
							AICAR	0.0082572	-6.9201	0.024134	1.6174
							dCMP 2-Deoxycytidine 5-monophosphate	0.012717	-6.2971	0.024557	1.6098
							N-Acetyl-L-phenylalanine	0.17732	-2.4956	0.024559	1.6098
							Palmitic acid	0.21642	-2.2081	0.029083	1.5364
							Inosine	0.33554	-1.5754	0.030908	1.5099
							Aceturic acid	0.4111	-1.2825	0.03109	1.5074
							L-Arginine	0.0014346	-9.4452	0.033353	1.4769
							DHAP Dihydroxyacetone phosphate	0.13593	-2.8791	0.033958	1.4691
							Choline	0.29724	-1.7503	0.034252	1.4653
							Thiamine	0.04409	-4.5034	0.03777	1.4229
							L-Kynurenine	0.21111	-2.2439	0.045289	1.344
							Glycerol 2-phosphate	0.45337	-1.1412	0.045293	1.344
							L-Glutamic Acid	0.040486	-4.6264	0.047813	1.3205
							D-Mannose 6-phosphate/Beta-D-Glucose 6-phosphate	0.011188	-6.4819	0.050302	1.2984
							alpha-Ketoglutaric Acid	0.35066	-1.5118	0.052723	1.278

## Sheet: S4
NTg-PR/NTg		Females					NTg-PR/NTg		Males
	FC	log2(FC)	raw.pval	#NAME?				FC	log2(FC)	raw.pval	#NAME?
Aniline	4.7743	2.2553	5.4824e-05	4.261			Orotic Acid	0.46568	-1.1026	0.036873	1.4333
L-Asparagine	2.454	1.2951	0.0015859	2.7997			N,N-Dimethyl-1,4-phenylenediamine	0.49944	-1.0016	0.038847	1.4106
Imidazoleacetic acid	2.8101	1.4906	0.0016342	2.7867			D-Maltose	0.32117	-1.6386	0.041655	1.3803
L-Glutamine	2.1754	1.1213	0.0050461	2.297			O-Phosphorylethanolamine	0.49335	-1.0193	0.046222	1.3352
N-Methyl-D-aspartic acid	2.3565	1.2366	0.0056523	2.2478			S1P	0.4946	-1.0157	0.051136	1.2913
Betaine	2.7792	1.4747	0.0070461	2.1521
3-Ureidopropionic acid	2.9995	1.5847	0.0071743	2.1442
Citrulline	2.5679	1.3606	0.012049	1.919
Histamine	5.4889	2.4565	0.015441	1.8113
4-Methylaminobutyrate	2.0514	1.0366	0.019075	1.7195
Nicotinamide	2.5769	1.3656	0.024348	1.6135
N-Methyl-L-Alanine	3.3266	1.7341	0.025209	1.5984
L-Pipecolic acid	3.3376	1.7388	0.025312	1.5967
N-Acetylaspartate	2.3345	1.2231	0.025757	1.5891
Thymine	2.5247	1.3361	0.027707	1.5574
2-Hydroxypyridine	2.92	1.546	0.031524	1.5014
Thiamine	0.095844	-3.3832	0.03181	1.4974
L-Arginine	0.24337	-2.0388	0.032677	1.4858
Pyrazole	3.3341	1.7373	0.043834	1.3582
4-Hydroxybenzaldehyde	2.3424	1.228	0.045463	1.3423
N,N-Dimethyl-1,4-phenylenediamine	2.592	1.3741	0.048388	1.3153

## Sheet: S5
Metabolic Pathway	Group	Direction	P-Value (not adjusted)	Log P-Value
Pantothenate and CoA biosynthesis	Female 3xTg vs 3xTg PR	Down	0.0033127	2.4798
Galactose metabolism	Female 3xTg vs 3xTg PR	Up	0.022727	1.6435
Histidine metabolism	Female 3xTg vs 3xTg PR	Down	0.028968	1.5381
Inositol phosphate metabolism	Female 3xTg vs 3xTg PR	Up	0.034484	1.4624
Ascorbate and aldarate metabolism	Female 3xTg vs 3xTg PR	Up	0.034484	1.4624
Nicotinate and nicotinamide metabolism	Female 3xTg vs 3xTg PR	Down	0.039009	1.4088
Valine, leucine and isoleucine biosynthesis	Female 3xTg vs 3xTg PR	Up	0.041537	1.3816
Valine, leucine and isoleucine degradation	Female 3xTg vs 3xTg PR	Up	0.047241	1.3257
Glycerolipid metabolism	Female 3xTg vs 3xTg PR	Up	0.055183	1.2582
Tyrosine metabolism	Female 3xTg vs 3xTg PR	Up	0.062377	1.205
beta-Alanine metabolism	Female 3xTg vs 3xTg PR	Down	0.068136	1.1666
Alanine, aspartate and glutamate metabolism	Female 3xTg vs 3xTg PR	Down	0.074651	1.127
Lysine degradation	Female 3xTg vs 3xTg PR	NA	NA	NA
Propanoate metabolism	Female 3xTg vs 3xTg PR	NA	NA	NA
Phenylalanine, tyrosine and tryptophan biosynthesis	Female 3xTg vs 3xTg PR	NA	NA	NA
Phenylalanine metabolism	Female 3xTg vs 3xTg PR	NA	NA	NA
Pyrimidine metabolism	Female 3xTg vs 3xTg PR	NA	NA	NA
Pentose and glucuronate interconversions	Female 3xTg vs 3xTg PR	NA	NA	NA
Ubiquinone and other terpenoid-quinone biosynthesis	Female 3xTg vs 3xTg PR	NA	NA	NA
Tryptophan metabolism	Female 3xTg vs 3xTg PR	NA	NA	NA
Citrate cycle (TCA cycle)	Female 3xTg vs 3xTg PR	NA	NA	NA
Nitrogen metabolism	Female 3xTg vs 3xTg PR	NA	NA	NA
Arginine biosynthesis	Female 3xTg vs 3xTg PR	NA	NA	NA
Glyoxylate and dicarboxylate metabolism	Female 3xTg vs 3xTg PR	NA	NA	NA
Arginine and proline metabolism	Female 3xTg vs 3xTg PR	NA	NA	NA
Fatty acid degradation	Female 3xTg vs 3xTg PR	NA	NA	NA
Butanoate metabolism	Female 3xTg vs 3xTg PR	NA	NA	NA
Fructose and mannose metabolism	Female 3xTg vs 3xTg PR	NA	NA	NA
Pentose phosphate pathway	Female 3xTg vs 3xTg PR	NA	NA	NA
Glycolysis / Gluconeogenesis	Female 3xTg vs 3xTg PR	NA	NA	NA
Glycine, serine and threonine metabolism	Female 3xTg vs 3xTg PR	NA	NA	NA
Glutathione metabolism	Female 3xTg vs 3xTg PR	NA	NA	NA
Taurine and hypotaurine metabolism	Female 3xTg vs 3xTg PR	NA	NA	NA
Amino sugar and nucleotide sugar metabolism	Female 3xTg vs 3xTg PR	NA	NA	NA
Porphyrin metabolism	Female 3xTg vs 3xTg PR	NA	NA	NA
Starch and sucrose metabolism	Female 3xTg vs 3xTg PR	NA	NA	NA
Glycerophospholipid metabolism	Female 3xTg vs 3xTg PR	NA	NA	NA
Cysteine and methionine metabolism	Female 3xTg vs 3xTg PR	NA	NA	NA
Ether lipid metabolism	Female 3xTg vs 3xTg PR	NA	NA	NA
Vitamin B6 metabolism	Female 3xTg vs 3xTg PR	NA	NA	NA
Sphingolipid metabolism	Female 3xTg vs 3xTg PR	NA	NA	NA
Thiamine metabolism	Female 3xTg vs 3xTg PR	NA	NA	NA
Purine metabolism	Female 3xTg vs 3xTg PR	NA	NA	NA
Lipoic acid metabolism	Female 3xTg vs 3xTg PR	NA	NA	NA
Primary bile acid biosynthesis	Female 3xTg vs 3xTg PR	NA	NA	NA
Retinol metabolism	Female 3xTg vs 3xTg PR	NA	NA	NA
Riboflavin metabolism	Female 3xTg vs 3xTg PR	NA	NA	NA
Fatty acid biosynthesis	Female 3xTg vs 3xTg PR	NA	NA	NA
Fatty acid elongation	Female 3xTg vs 3xTg PR	NA	NA	NA
Biosynthesis of unsaturated fatty acids	Female 3xTg vs 3xTg PR	NA	NA	NA
D-Amino acid metabolism	Female 3xTg vs 3xTg PR	NA	NA	NA
Amino sugar and nucleotide sugar metabolism	Male 3xTg vs 3xTg PR	Down	0.001905	2.7201
Retinol metabolism	Male 3xTg vs 3xTg PR	Down	0.002883	2.5402
Fructose and mannose metabolism	Male 3xTg vs 3xTg PR	Down	0.004031	2.3946
Pentose phosphate pathway	Male 3xTg vs 3xTg PR	Down	0.004031	2.3946
Glycolysis / Gluconeogenesis	Male 3xTg vs 3xTg PR	Down	0.004031	2.3946
Cysteine and methionine metabolism	Male 3xTg vs 3xTg PR	Down	0.0079407	2.1001
Taurine and hypotaurine metabolism	Male 3xTg vs 3xTg PR	Down	0.0089736	2.047
Tryptophan metabolism	Male 3xTg vs 3xTg PR	Down	0.010458	1.9805
Riboflavin metabolism	Male 3xTg vs 3xTg PR	Down	0.012022	1.92
Butanoate metabolism	Male 3xTg vs 3xTg PR	Down	0.01456	1.8369
Inositol phosphate metabolism	Male 3xTg vs 3xTg PR	Up	0.014686	1.8331
Ascorbate and aldarate metabolism	Male 3xTg vs 3xTg PR	Up	0.014686	1.8331
Citrate cycle (TCA cycle)	Male 3xTg vs 3xTg PR	Down	0.017581	1.7549
Glycerophospholipid metabolism	Male 3xTg vs 3xTg PR	Down	0.019233	1.716
Glycine, serine and threonine metabolism	Male 3xTg vs 3xTg PR	Down	0.021184	1.674
Lipoic acid metabolism	Male 3xTg vs 3xTg PR	Down	0.021274	1.6721
Pyrimidine metabolism	Male 3xTg vs 3xTg PR	Down	0.021399	1.6696
Purine metabolism	Male 3xTg vs 3xTg PR	Down	0.024236	1.6155
Starch and sucrose metabolism	Male 3xTg vs 3xTg PR	Down	0.027476	1.561
Fatty acid biosynthesis	Male 3xTg vs 3xTg PR	Down	0.029083	1.5364
Fatty acid elongation	Male 3xTg vs 3xTg PR	Down	0.029083	1.5364
Biosynthesis of unsaturated fatty acids	Male 3xTg vs 3xTg PR	Down	0.029083	1.5364
Arginine and proline metabolism	Male 3xTg vs 3xTg PR	Down	0.032956	1.4821
Valine, leucine and isoleucine biosynthesis	Male 3xTg vs 3xTg PR	Up	0.035037	1.4555
Thiamine metabolism	Male 3xTg vs 3xTg PR	Down	0.03777	1.4229
Valine, leucine and isoleucine degradation	Male 3xTg vs 3xTg PR	Up	0.04529	1.344
Glutathione metabolism	Male 3xTg vs 3xTg PR	Down	0.052718	1.278
Galactose metabolism	Male 3xTg vs 3xTg PR	Up	0.059984	1.222
Propanoate metabolism	Male 3xTg vs 3xTg PR	Down	0.061355	1.2121
Glyoxylate and dicarboxylate metabolism	Male 3xTg vs 3xTg PR	Down	0.066811	1.1752
Porphyrin metabolism	Male 3xTg vs 3xTg PR	Down	0.070491	1.1519
Alanine, aspartate and glutamate metabolism	Male 3xTg vs 3xTg PR	Down	0.080613	1.0936
Ether lipid metabolism	Male 3xTg vs 3xTg PR	Down	0.0907	1.0424
Fatty acid degradation	Male 3xTg vs 3xTg PR	NA	NA	NA
Arginine biosynthesis	Male 3xTg vs 3xTg PR	NA	NA	NA
Phenylalanine, tyrosine and tryptophan biosynthesis	Male 3xTg vs 3xTg PR	NA	NA	NA
Phenylalanine metabolism	Male 3xTg vs 3xTg PR	NA	NA	NA
Primary bile acid biosynthesis	Male 3xTg vs 3xTg PR	NA	NA	NA
Sphingolipid metabolism	Male 3xTg vs 3xTg PR	NA	NA	NA
Nitrogen metabolism	Male 3xTg vs 3xTg PR	NA	NA	NA
D-Amino acid metabolism	Male 3xTg vs 3xTg PR	NA	NA	NA
Glycerolipid metabolism	Male 3xTg vs 3xTg PR	NA	NA	NA
Tyrosine metabolism	Male 3xTg vs 3xTg PR	NA	NA	NA
beta-Alanine metabolism	Male 3xTg vs 3xTg PR	NA	NA	NA
Ubiquinone and other terpenoid-quinone biosynthesis	Male 3xTg vs 3xTg PR	NA	NA	NA
Histidine metabolism	Male 3xTg vs 3xTg PR	NA	NA	NA
Nicotinate and nicotinamide metabolism	Male 3xTg vs 3xTg PR	NA	NA	NA
Vitamin B6 metabolism	Male 3xTg vs 3xTg PR	NA	NA	NA
Lysine degradation	Male 3xTg vs 3xTg PR	NA	NA	NA
Pantothenate and CoA biosynthesis	Male 3xTg vs 3xTg PR	NA	NA	NA
Pentose and glucuronate interconversions	Male 3xTg vs 3xTg PR	NA	NA	NA

## Sheet: S6
Metabolic Pathway	Group	Direction	P-Value (not adjusted)	Log P-Value
Nitrogen metabolism	Female 3xTg vs 3xTg PR	Up	0.0050461	2.297
Pantothenate and CoA biosynthesis	Female 3xTg vs 3xTg PR	Up	0.0078561	2.1048
Arginine biosynthesis	Female 3xTg vs 3xTg PR	Up	0.013726	1.8624
Pyrimidine metabolism	Female 3xTg vs 3xTg PR	Up	0.020849	1.6809
Arginine and proline metabolism	Female 3xTg vs 3xTg PR	Up	0.023658	1.626
Glyoxylate and dicarboxylate metabolism	Female 3xTg vs 3xTg PR	Up	0.023696	1.6253
Alanine, aspartate and glutamate metabolism	Female 3xTg vs 3xTg PR	Up	0.028127	1.5509
Histidine metabolism	Female 3xTg vs 3xTg PR	Up	0.028999	1.5376
Thiamine metabolism	Female 3xTg vs 3xTg PR	Down	0.03181	1.4974
Glycine, serine and threonine metabolism	Female 3xTg vs 3xTg PR	Up	0.036118	1.4423
beta-Alanine metabolism	Female 3xTg vs 3xTg PR	Up	0.038849	1.4106
Glutathione metabolism	Female 3xTg vs 3xTg PR	Down	0.051096	1.2916
Inositol phosphate metabolism	Female 3xTg vs 3xTg PR	Up	0.059311	1.2269
Ascorbate and aldarate metabolism	Female 3xTg vs 3xTg PR	Up	0.059311	1.2269
Sphingolipid metabolism	Female 3xTg vs 3xTg PR	Up	0.063814	1.1951
Ether lipid metabolism	Female 3xTg vs 3xTg PR	Down	0.067113	1.1732
Lysine degradation	Female 3xTg vs 3xTg PR	Up	0.081332	1.0897
Glycerophospholipid metabolism	Female 3xTg vs 3xTg PR	Down	0.090948	1.0412
Propanoate metabolism	Female 3xTg vs 3xTg PR	NA	NA	NA
Galactose metabolism	Female 3xTg vs 3xTg PR	NA	NA	NA
Cysteine and methionine metabolism	Female 3xTg vs 3xTg PR	NA	NA	NA
Purine metabolism	Female 3xTg vs 3xTg PR	NA	NA	NA
Fructose and mannose metabolism	Female 3xTg vs 3xTg PR	NA	NA	NA
Pentose phosphate pathway	Female 3xTg vs 3xTg PR	NA	NA	NA
Glycolysis / Gluconeogenesis	Female 3xTg vs 3xTg PR	NA	NA	NA
Glycerolipid metabolism	Female 3xTg vs 3xTg PR	NA	NA	NA
Porphyrin metabolism	Female 3xTg vs 3xTg PR	NA	NA	NA
Citrate cycle (TCA cycle)	Female 3xTg vs 3xTg PR	NA	NA	NA
Pentose and glucuronate interconversions	Female 3xTg vs 3xTg PR	NA	NA	NA
Nicotinate and nicotinamide metabolism	Female 3xTg vs 3xTg PR	NA	NA	NA
Fatty acid biosynthesis	Female 3xTg vs 3xTg PR	NA	NA	NA
Fatty acid elongation	Female 3xTg vs 3xTg PR	NA	NA	NA
Biosynthesis of unsaturated fatty acids	Female 3xTg vs 3xTg PR	NA	NA	NA
Amino sugar and nucleotide sugar metabolism	Female 3xTg vs 3xTg PR	NA	NA	NA
Riboflavin metabolism	Female 3xTg vs 3xTg PR	NA	NA	NA
Lipoic acid metabolism	Female 3xTg vs 3xTg PR	NA	NA	NA
Tryptophan metabolism	Female 3xTg vs 3xTg PR	NA	NA	NA
Starch and sucrose metabolism	Female 3xTg vs 3xTg PR	NA	NA	NA
Butanoate metabolism	Female 3xTg vs 3xTg PR	NA	NA	NA
Primary bile acid biosynthesis	Female 3xTg vs 3xTg PR	NA	NA	NA
Retinol metabolism	Female 3xTg vs 3xTg PR	NA	NA	NA
Fatty acid degradation	Female 3xTg vs 3xTg PR	NA	NA	NA
Valine, leucine and isoleucine biosynthesis	Female 3xTg vs 3xTg PR	NA	NA	NA
Phenylalanine, tyrosine and tryptophan biosynthesis	Female 3xTg vs 3xTg PR	NA	NA	NA
Phenylalanine metabolism	Female 3xTg vs 3xTg PR	NA	NA	NA
Taurine and hypotaurine metabolism	Female 3xTg vs 3xTg PR	NA	NA	NA
Valine, leucine and isoleucine degradation	Female 3xTg vs 3xTg PR	NA	NA	NA
Tyrosine metabolism	Female 3xTg vs 3xTg PR	NA	NA	NA
D-Amino acid metabolism	Female 3xTg vs 3xTg PR	NA	NA	NA
Vitamin B6 metabolism	Female 3xTg vs 3xTg PR	NA	NA	NA
Ubiquinone and other terpenoid-quinone biosynthesis	Female 3xTg vs 3xTg PR	NA	NA	NA
Propanoate metabolism	Male 3xTg vs 3xTg PR	Down	0.0031003	2.5086
beta-Alanine metabolism	Male 3xTg vs 3xTg PR	Down	0.032264	1.4913
Galactose metabolism	Male 3xTg vs 3xTg PR	Down	0.033656	1.4729
Pyrimidine metabolism	Male 3xTg vs 3xTg PR	Down	0.035975	1.444
Pantothenate and CoA biosynthesis	Male 3xTg vs 3xTg PR	Down	0.048681	1.3126
Sphingolipid metabolism	Male 3xTg vs 3xTg PR	Down	0.059997	1.2219
Inositol phosphate metabolism	Male 3xTg vs 3xTg PR	Down	0.062753	1.2024
Ascorbate and aldarate metabolism	Male 3xTg vs 3xTg PR	Down	0.062753	1.2024
Pentose and glucuronate interconversions	Male 3xTg vs 3xTg PR	Down	0.063834	1.1949
Phenylalanine, tyrosine and tryptophan biosynthesis	Male 3xTg vs 3xTg PR	Down	0.068934	1.1616
Phenylalanine metabolism	Male 3xTg vs 3xTg PR	Down	0.068934	1.1616
Nicotinate and nicotinamide metabolism	Male 3xTg vs 3xTg PR	Down	0.085104	1.07
Vitamin B6 metabolism	Male 3xTg vs 3xTg PR	Down	0.087267	1.0591
Histidine metabolism	Male 3xTg vs 3xTg PR	Down	0.090487	1.0434
Ubiquinone and other terpenoid-quinone biosynthesis	Male 3xTg vs 3xTg PR	Down	0.096566	1.0152
Arginine biosynthesis	Male 3xTg vs 3xTg PR	NA	NA	NA
Tryptophan metabolism	Male 3xTg vs 3xTg PR	NA	NA	NA
Starch and sucrose metabolism	Male 3xTg vs 3xTg PR	NA	NA	NA
Nitrogen metabolism	Male 3xTg vs 3xTg PR	NA	NA	NA
Glycerolipid metabolism	Male 3xTg vs 3xTg PR	NA	NA	NA
Arginine and proline metabolism	Male 3xTg vs 3xTg PR	NA	NA	NA
Taurine and hypotaurine metabolism	Male 3xTg vs 3xTg PR	NA	NA	NA
Fatty acid degradation	Male 3xTg vs 3xTg PR	NA	NA	NA
Primary bile acid biosynthesis	Male 3xTg vs 3xTg PR	NA	NA	NA
Purine metabolism	Male 3xTg vs 3xTg PR	NA	NA	NA
Alanine, aspartate and glutamate metabolism	Male 3xTg vs 3xTg PR	NA	NA	NA
Tyrosine metabolism	Male 3xTg vs 3xTg PR	NA	NA	NA
Glycerophospholipid metabolism	Male 3xTg vs 3xTg PR	NA	NA	NA
Thiamine metabolism	Male 3xTg vs 3xTg PR	NA	NA	NA
Lysine degradation	Male 3xTg vs 3xTg PR	NA	NA	NA
Glutathione metabolism	Male 3xTg vs 3xTg PR	NA	NA	NA
Glycine, serine and threonine metabolism	Male 3xTg vs 3xTg PR	NA	NA	NA
Valine, leucine and isoleucine biosynthesis	Male 3xTg vs 3xTg PR	NA	NA	NA
Valine, leucine and isoleucine degradation	Male 3xTg vs 3xTg PR	NA	NA	NA
Butanoate metabolism	Male 3xTg vs 3xTg PR	NA	NA	NA
Glyoxylate and dicarboxylate metabolism	Male 3xTg vs 3xTg PR	NA	NA	NA
Porphyrin metabolism	Male 3xTg vs 3xTg PR	NA	NA	NA
Retinol metabolism	Male 3xTg vs 3xTg PR	NA	NA	NA
Fructose and mannose metabolism	Male 3xTg vs 3xTg PR	NA	NA	NA
Pentose phosphate pathway	Male 3xTg vs 3xTg PR	NA	NA	NA
Glycolysis / Gluconeogenesis	Male 3xTg vs 3xTg PR	NA	NA	NA
Fatty acid biosynthesis	Male 3xTg vs 3xTg PR	NA	NA	NA
Fatty acid elongation	Male 3xTg vs 3xTg PR	NA	NA	NA
Biosynthesis of unsaturated fatty acids	Male 3xTg vs 3xTg PR	NA	NA	NA
Ether lipid metabolism	Male 3xTg vs 3xTg PR	NA	NA	NA
Citrate cycle (TCA cycle)	Male 3xTg vs 3xTg PR	NA	NA	NA
Amino sugar and nucleotide sugar metabolism	Male 3xTg vs 3xTg PR	NA	NA	NA
Lipoic acid metabolism	Male 3xTg vs 3xTg PR	NA	NA	NA
Cysteine and methionine metabolism	Male 3xTg vs 3xTg PR	NA	NA	NA
Riboflavin metabolism	Male 3xTg vs 3xTg PR	NA	NA	NA
D-Amino acid metabolism	Male 3xTg vs 3xTg PR	NA	NA	NA

## Sheet: S7
label	metaGroupId	groupId	goodPeakCount	medMz	medRt	maxQuality	adductName	isotopeLabel	compound	compoundId	formula	expectedRtDiff	ppmDiff	parent	06152022_Reji_AD_ProteinRestriction_metabolomics_neg_1	06152022_Reji_AD_ProteinRestriction_metabolomics_neg_2	06152022_Reji_AD_ProteinRestriction_metabolomics_neg_3	06152022_Reji_AD_ProteinRestriction_metabolomics_neg_4	06152022_Reji_AD_ProteinRestriction_metabolomics_neg_5	06152022_Reji_AD_ProteinRestriction_metabolomics_neg_6	06152022_Reji_AD_ProteinRestriction_metabolomics_neg_7	06152022_Reji_AD_ProteinRestriction_metabolomics_neg_8	06152022_Reji_AD_ProteinRestriction_metabolomics_neg_9	06152022_Reji_AD_ProteinRestriction_metabolomics_neg_10	06152022_Reji_AD_ProteinRestriction_metabolomics_neg_11	06152022_Reji_AD_ProteinRestriction_metabolomics_neg_12	06152022_Reji_AD_ProteinRestriction_metabolomics_neg_13	06152022_Reji_AD_ProteinRestriction_metabolomics_neg_14	06152022_Reji_AD_ProteinRestriction_metabolomics_neg_15	06152022_Reji_AD_ProteinRestriction_metabolomics_neg_16	06152022_Reji_AD_ProteinRestriction_metabolomics_neg_17	06152022_Reji_AD_ProteinRestriction_metabolomics_neg_19	06152022_Reji_AD_ProteinRestriction_metabolomics_neg_21	06152022_Reji_AD_ProteinRestriction_metabolomics_neg_22	06152022_Reji_AD_ProteinRestriction_metabolomics_neg_24	06152022_Reji_AD_ProteinRestriction_metabolomics_neg_25	06152022_Reji_AD_ProteinRestriction_metabolomics_neg_26	06152022_Reji_AD_ProteinRestriction_metabolomics_neg_27	06152022_Reji_AD_ProteinRestriction_metabolomics_neg_29	06152022_Reji_AD_ProteinRestriction_metabolomics_neg_30	06152022_Reji_AD_ProteinRestriction_metabolomics_neg_32	06152022_Reji_AD_ProteinRestriction_metabolomics_neg_33	06152022_Reji_AD_ProteinRestriction_metabolomics_neg_34	06152022_Reji_AD_ProteinRestriction_metabolomics_neg_35	06152022_Reji_AD_ProteinRestriction_metabolomics_neg_36	06152022_Reji_AD_ProteinRestriction_metabolomics_neg_37	06152022_Reji_AD_ProteinRestriction_metabolomics_neg_38	06152022_Reji_AD_ProteinRestriction_metabolomics_neg_40	06152022_Reji_AD_ProteinRestriction_metabolomics_neg_41
														Sample Name	Blank	1	2	3	4	5	6	Blank	7	8	9	10	11	12	Blank	13	14	16	18	Blank	20	21	22	23	Blank	25	27	28	29	30	31	Blank	32	34	35
														Sample id		1R	1n_F	1r_F	2R	2RL	3R		3N	3n_F	3L	4N	4l_F	4r_F		4R	5N	5R	5l_F		5R	6N	6R	6N		6l_F	7n_F	7l_F	7r_F	8l_F	8n_F		8r_F	9R	10rl_F
														Genotype		NTg	3xtg	3xtg	NTg	NTg	NTg		NTg	3xtg	NTg	NTg	3xtg	3xtg		NTg	3xTg	NTg	3xtg		3xtg	3xtg	NTg	NTg		3xtg	3xTg	3xTg	3xTg	NTg	NTg		NTg	3xTg	NTg
														Diet		PR	Control	Control	PR	PR	PR		PR	Control	PR	Control	Control	PR		Control	PR	Control	PR		PR	Control	Control	Control		PR	PR	PR	PR	Control	Control		Control	PR	Control
														Sex		Male	Female	Female	Male	Male	Male		Male	Female	Male	Male	Female	Female		Male	Male	Male	Female		Male	Male	Male	Male		Female	Female	Female	Female	Female	Female		Female	Male	Female
g	1	1	50	153.02	12.061	0.859331	[M-H]-	C12 PARENT	2_3-dihydroxybenzoic acid	C00196	C7H6O4	1.51948	1.39605	153.02	6786.53	6712364	2.07365e+06	1.24504e+06	1.88194e+06	2.47605e+06	2.26877e+06	4987.54	4906974	370362	810425	4585718	961834	613134	3947.98	1.18268e+06	684576	7.17511e+06	1.39301e+06	7747.38	2.55487e+06	9111507	1844483	592961	4599.38	1.1962e+06	905762	1.51418e+06	2.21988e+06	2.33266e+06	1.16409e+06	4649.39	507927	3.16094e+06	408401
g	2	2	56	132.03	3.517	0.838156	[M-H]-	C12 PARENT	aspartate	C00049	C4H7NO4	0.532656	0.462282	132.03	88136	4.15319e+06	3.54182e+06	6.38922e+06	4.17518e+06	3464750	4.68553e+06	70634	3.72366e+06	3.01583e+06	3802505	3.95927e+06	4.23191e+06	2.65464e+06	57116.8	5498562	5.39089e+06	6.32284e+06	3.32027e+06	59630	17661940	12342371	4.49535e+06	4770837	59123.4	3.116e+06	3968741	2439508	4.4863e+06	2443019	3.31564e+06	74656.5	3.54447e+06	4.6113e+06	3.81702e+06
g	3	3	59	146.046	3.565	0.855573	[M-H]-	C12 PARENT	glutamate	C00025	C5H9NO4	0.634594	0.313438	146.046	341728	10319585	7600832	16089768	11275901	5.96272e+06	6163498	299290	6.25588e+06	5.59614e+06	6.36284e+06	6.5934e+06	7671044	5.71333e+06	321373	7.29171e+06	12548216	7.45224e+06	5136093	339927	7.17755e+06	3806378	9077467	10948695	382486	7.14915e+06	4.57346e+06	6168180	4687094	7.6393e+06	8420526	391047	6987276	4738442	8936693
g	4	4	60	145.062	1.205	0.857714	[M-H]-	C12 PARENT	glutamine	C00064	C5H10N2O3	0.104701	0.736317	145.062	1.2305e+06	182836272	240165200	145431312	178736464	249280880	197858768	2.64236e+06	225565136	242634880	196555184	144892640	193258032	198011520	2.10622e+06	150740672	111597240	158174768	168764560	2.76384e+06	183487888	121826272	113810520	119195232	2767039	165019984	183757136	241640464	194783360	146194352	135376176	2897609	168715712	141279568	150857600
g	5	5	50	148.044	1.577	0.842186	[M-H]-	C12 PARENT	methionine	C00073	C5H11NO2S	0.076682	0.309208	148.044	0	20618838	15365688	11215707	16810790	12095544	14831355	0	8510297	13842748	12153581	5.43121e+06	10454533	8.18504e+06	0	12080563	8305212	4.24287e+06	6.44548e+06	2485.42	8822545	14414265	8523245	7.01912e+06	2440.41	6.08015e+06	8377860	9776617	8696636	15210227	6564248	0	11840561	13976907	7.82653e+06
g	6	6	41	221.06	1.209	0.854073	[M-H]-	C12 PARENT	cystathionine	C00542	C7H14N2O4S	0.208969	0.207077	221.06	0	71084	60308.4	41403	127237	168415	180997	2040.1	242280	61443.6	178637	105389	80785.8	259129	0	104674	113396	76108.2	155590	0	82020.9	202170	101468	154613	0	207408	81984.4	233542	170282	134062	98554.5	0	143078	196280	25546.4
g	7	7	55	131.083	1.231	0.835908	[M-H]-	C12 PARENT	ornithine	C00077	C5H12N2O2	0.231443	0.116406	131.083	10880.6	12404501	15909696	10530751	15109497	15854864	13852735	25979.4	11028851	13019452	14969587	12566353	16124555	23374394	17148.3	9321348	9375041	12148479	17070960	29207.3	13477111	19733190	11326656	12932083	29416.2	11712644	14051369	24575662	14838669	14047440	6.43433e+06	27851.2	12979357	16135044	7.06943e+06
g	8	8	51	173.104	1.029	0.856827	[M-H]-	C12 PARENT	arginine	C00062	C6H14N4O2	0.429097	0.528887	173.104	32176.8	1.55943e+06	1.28912e+06	551528	1.45295e+06	1.27585e+06	809620	25155.9	1.18331e+06	889349	772288	743303	1.33515e+06	1.20579e+06	27411.1	1.23434e+06	965650	936403	832295	30074.7	969341	1.14316e+06	1.015e+06	1.00254e+06	29075	980682	955552	1622695	853745	1299662	892114	35142.5	957758	1.09324e+06	1.26823e+06
g	9	9	50	145.014	11.592	0.852808	[M-H]-	C12 PARENT	a-ketoglutarate	C00026	C5H6O5	1.55836	0.315668	145.014	6543.11	2.4874e+06	3757136	714258	2.27091e+06	531753	248029	5310.22	124387	167905	646793	662693	216167	133356	4713.67	1.00288e+06	564881	226570	2.28955e+06	3742.33	1.46076e+06	803256	1.98078e+06	370400	9144.58	1.14578e+06	1255655	2985757	1301441	5891482	1648311	4669.34	3.13986e+06	1.52492e+06	3.60677e+06
g	10	10	60	117.019	9.758	0.840428	[M-H]-	C12 PARENT	succinate	C00042	C4H6O4	1.84202	0.717175	117.019	1719709	33163462	22985230	25180138	50117516	12480641	10402102	1519772	9749485	7.33299e+06	10615305	26981118	9189440	8.01573e+06	1451583	19235986	24230406	26707248	13277373	1401448	12536056	7.75601e+06	14964040	38493516	1.37456e+06	28199992	8.28394e+06	16498579	9668549	19917534	15871043	1441810	10973549	10963305	12177151
g	11	11	53	115.004	9.824	0.840433	[M-H]-	C12 PARENT	fumarate	C00122	C4H4O4	3.67635	0.132681	115.004	178609	8592795	23519410	14289216	26099818	12836448	10959243	205751	7.29415e+06	6.74627e+06	13438587	13473265	5.83513e+06	5.40895e+06	210740	10450589	13245981	10281488	12451773	197823	6254964	3902388	10592451	12628507	202987	10639041	5.45293e+06	14996020	7453346	15352632	8536075	215374	8827905	9871703	10221671
g	12	12	59	191.02	11.258	0.846616	[M-H]-	C12 PARENT	citrate	C00158	C6H8O7	2.34247	0.399403	191.02	86784.5	326764576	378566688	301359904	345998080	321962112	307384096	448582	279248000	251595760	319967392	265983344	317468704	387626784	913843	258844848	311521440	253995840	376889216	1.09249e+06	297471264	455332960	268034032	253635328	1.11008e+06	300650144	292787872	394415872	328895968	325328096	282043424	981526	317298912	288403872	280625184
g	13	13	58	133.014	9.826	0.839928	[M-H]-	C12 PARENT	malate	C00149|C00497|C00711	C4H6O5	2.87353	0.114715	133.014	969985	46325456	129015656	77179128	142216640	68037776	58880224	1.14847e+06	40519412	36483504	72665624	74313304	32373034	29708582	1.21918e+06	57576356	71959424	57698068	67935152	1.14292e+06	34504948	22695346	58945716	69741216	1229481	57367184	30467366	83777624	40038692	83521048	46607088	1.29593e+06	48190884	53710272	55135276
g	14	14	60	116.072	1.393	0.841313	[M-H]-	C12 PARENT	valine	C00183	C5H11NO2	0.393379	0.52584	116.072	689526	94352360	118998568	89883432	86853672	90990080	75399048	801125	57284880	91651640	69532152	48884476	78884096	72913296	647408	88041016	61877392	58817220	41389892	805111	66047008	63680492	71875368	67107084	784260	42740644	54994580	62744016	67322536	88413976	50135188	816438	70245512	85215160	55918164
g	15	15	16	482.961	11.872	0.854655	[M-H]-	C12 PARENT	UTP	C00075	C9H15N2O15P3	2.93816	1.51652	482.961	0	14179.4	50574.3	112236	32752.6	4525.02	40969.8	0	71112.3	5585.02	4410.85	35972.2	43019.6	0	0	156134	37997.6	311716	0	0	52431.2	0	150286	164036	0	3763.64	7175.29	0	0	15141.5	465545	3770.44	31665.9	34689.6	38186.5
g	16	16	60	243.062	1.747	0.852279	[M-H]-	C12 PARENT	uridine	C00299	C9H12N2O6	0.046518	0.188332	243.062	97284.3	24708536	8331982	11051803	22383374	7483232	5973412	90967.1	7.14983e+06	5.43322e+06	6.33973e+06	6.82805e+06	7.64925e+06	6.54848e+06	90927.3	16133800	7746864	10266495	3250566	115432	4163005	2.12985e+06	8028944	16995000	97734.6	5.92093e+06	4122992	6.74372e+06	4368383	9986180	8920148	102053	7173156	6.07871e+06	9418209
g	17	17	60	180.067	1.787	0.84869	[M-H]-	C12 PARENT	tyrosine	C00082	C9H11NO3	0.213367	0.508438	180.067	184622	34618308	39475184	25300830	45244656	39416196	25896650	182338	17468560	33446294	19893820	23510562	22382576	25035834	183232	24599606	19379202	19025616	20083794	174750	29329962	24117912	24727450	18666050	179277	20417550	19629460	25531846	16827630	38928500	24813202	192751	25845760	32534986	24463606
g	18	18	50	203.083	5.663	0.842311	[M-H]-	C12 PARENT	tryptophan	C00078|C00525|C00806	C11H12N2O2	1.83652	0.676223	203.083	3469.9	32590542	46876412	33428310	38977664	36266512	21808920	4557.83	26237890	31869274	23982694	15701651	25398048	33296904	2820.28	13731809	18332528	11394757	22501782	3192.81	24822998	25105992	19507386	6.85275e+06	3654.5	22046204	20626746	26013680	21921042	43788932	20051134	2593.95	37832036	27308138	27729570
g	19	19	59	118.051	1.238	0.855778	[M-H]-	C12 PARENT	threonine	C00188	C4H9NO3	0.237682	0.064628	118.051	246466	43772172	60058292	29466080	49105456	56951776	61208748	470252	35393632	47131280	49665228	38847428	29037928	30232870	453359	49098388	19465262	31046206	22145030	476084	45139904	51506356	37478548	35455828	476846	21887706	33003338	37247280	39035308	50378452	19395294	470343	53335884	53897356	27419498
g	20	20	53	114.056	1.302	0.839748	[M-H]-	C12 PARENT	proline	C00148	C5H9NO2	0.181714	0.602025	114.056	52100.3	6.56551e+06	8445849	7.60488e+06	8143570	6.96537e+06	6.10814e+06	81749.3	5.72565e+06	6856116	5.7908e+06	3.67377e+06	6484626	6.78285e+06	58616	4471392	5.88212e+06	4.74943e+06	6.69695e+06	81269.7	6.18287e+06	10001285	4391395	4.73327e+06	83561.5	4244188	5987476	6.23876e+06	5508216	6071054	2582281	82417.1	5688246	5.32937e+06	3814125
g	21	21	42	166.975	12.206	0.814479	[M-H]-	C12 PARENT	phosphoenolpyruvate	C00074	C3H5O6P	1.66354	0.548302	166.975	0	6.62118e+06	3.63507e+06	22132868	8.16538e+06	1.2244e+06	4.25947e+06	10741.4	6.28347e+06	1.22328e+06	1.0294e+06	7417352	1.69574e+06	526346	0	7.99852e+06	3.55496e+06	18683846	153917	0	746185	257228	4.66096e+06	21108168	4109.21	282905	346573	355084	392598	3488821	8655983	5442.71	2.26718e+06	789468	2.12409e+06
g	22	22	60	164.072	3.041	0.849121	[M-H]-	C12 PARENT	phenylalanine	C00079	C9H11NO2	0.759254	0.837007	164.072	233292	29845690	39334416	30389024	31006774	26426232	20475062	230086	18071890	27734240	19159554	20858250	23306442	24366504	197302	25847534	20564566	23545098	21574238	215709	21268190	25491392	18901518	21741678	202680	22399472	17189520	26242630	17997950	28816398	25305538	202756	22700442	21938002	18483686
g	23	23	47	121.041	2.416	0.846583	[M-H]-	C12 PARENT	nicotinamide	C00153	C6H6N2O	NA	0	121.041	6158.21	97870.2	60762.4	NA	62432.4	65260.7	70227.9	4170.01	42052.4	40548.3	43084.9	32954.1	63536.7	62336.6	2806.49	60726.2	65678.1	57839.3	36881.4	3131.87	41048.9	24921.1	34912.5	67878.1	2733.45	28731.5	24449.6	37582	51672	74820.9	60536.6	2902.78	48164.6	39378.3	59179.1
g	24	24	53	145.098	1.011	0.844857	[M-H]-	C12 PARENT	lysine	C00047	C6H14N2O2	0.211268	0.210324	145.098	60548.7	2.22168e+06	3.70116e+06	2165253	1.76081e+06	1.99287e+06	1.54772e+06	53640	1757998	2789513	1479023	1.20762e+06	2347854	2484331	62175.2	1.72381e+06	2232507	1.1746e+06	1.94439e+06	56238.2	2.22986e+06	2.69643e+06	1.37907e+06	1932958	58340.3	2.14348e+06	1.93428e+06	2.95958e+06	2010178	2.86738e+06	2.24179e+06	64154.3	2.3775e+06	2.05185e+06	2247451
g	25	25	60	130.087	1.882	0.83009	[M-H]-	C12 PARENT	leucine/isoleucine	C00123	C6H13NO2	0.018064	0.469186	130.087	702743	74159512	100867496	63868384	65659476	64939268	48087660	708935	45749088	81042296	42368780	36398356	56069504	58191060	619614	67516584	42534548	50549984	34185456	672185	57892512	47804844	37149060	52001920	651364	42362436	38472028	59967196	44583376	57957212	55891952	736429	43412652	57280416	34326420
g	26	26	50	154.062	1.079	0.836324	[M-H]-	C12 PARENT	histidine	C00135	C6H9N3O2	0.078866	0.99043	154.062	30882.6	7.17814e+06	8283316	6533272	5.25071e+06	6745590	5500007	37439.2	5.31403e+06	5322232	4241613	4.55311e+06	6.11321e+06	7.39125e+06	6093.97	5.33987e+06	5.56431e+06	4.83547e+06	7.00286e+06	18371.2	7340884	5.58635e+06	4.98382e+06	5.58529e+06	25508	6.17184e+06	5816598	8.14113e+06	5.69406e+06	5877628	4.29183e+06	7836.03	4590971	4.73438e+06	3.29856e+06
g	27	27	33	282.084	2.41	0.851588	[M-H]-	C12 PARENT	guanosine	C00387	C10H13N5O5	1.58951	0.649116	282.084	0	124564	5233.39	6942.23	74354.4	15845.1	33738.3	0	54990.4	0	59625.1	14468.9	7524.33	11571.9	0	33603.4	48358.1	57983.9	3609.03	0	13319.6	56731.7	35319.4	102395	0	20073.5	18140.2	15327.5	4528	79550.6	18275.2	0	4693.39	22328	14951.5
g	28	28	19	521.983	11.96	0.855153	[M-H]-	C12 PARENT	GTP	C00044	C10H16N5O14P3	2.97972	1.40315	521.983	0	10730.6	53570.8	75976.9	28231.2	5087.35	93472.5	0	109670	5537.58	6720.98	182397	53779.4	6483.33	0	274819	8463.05	668204	0	0	46732.8	0	206267	480567	0	0	7673.24	0	0	29006.9	624761	0	48467.7	42507.5	43125.3
g	29	29	35	362.051	8.86	0.855489	[M-H]-	C12 PARENT	GMP	C06193	C10H14N5O8P	1.64044	0.252873	362.051	0	2050763	39592.5	1.41148e+06	1.90047e+06	508500	1.23683e+06	0	1939267	10647.4	549625	1.04427e+06	230701	18850.8	0	1.63699e+06	1.17179e+06	3455435	16982.8	0	157909	40922.8	2.08252e+06	3.85351e+06	0	20717.6	53156.6	0	4428.22	302587	734628	0	87217.3	189198	451388
g	30	30	49	611.146	9.479	0.854517	[M-H]-	C12 PARENT	glutathione disulfide	C00127	C20H32N6O12S2	3.46128	1.89753	611.146	19417.4	140890	7735.09	19640.5	53867.8	16335.3	44047.8	47568.4	42335.1	25763.3	8647.24	8228.5	29977.6	24658.9	70750.3	23421.2	64635.4	7516.33	37348.4	79342.7	29081.4	21610.6	51836	6625.67	76515.8	60506.2	45166.2	17795.9	34472.7	124856	155708	82488.1	60242.2	41767.9	64157.8
g	31	31	13	306.076	6.177	0.84237	[M-H]-	C12 PARENT	glutathione	C00051	C10H17N3O6S	1.52274	0.598234	306.076	5274.99	54254.6	57717.3	10395.1	29582.3	30578.9	45416.8	19641.8	15454.5	44333.4	25178.1	9010.13	66542.3	21339.5	19890.5	9166.08	120741	16486.7	85665.6	23449.1	33396.7	12789	61569.6	24932.8	27174.3	72698.8	28888.4	29603.2	29391.5	50080.1	33996.1	36217.4	53430.5	20474.8	48306.9
g	32	32	36	442.017	10.755	0.854231	[M-H]-	C12 PARENT	GDP	C00035	C10H15N5O11P2	3.14504	0.069042	442.017	0	163454	37007.4	520958	433713	132334	482900	0	657703	18239.6	120117	307120	97585.2	6064.52	0	444740	176670	2.51441e+06	6344.31	0	74090.5	10822.4	1.34264e+06	1.58248e+06	0	7714.33	43056.9	0	5229.44	418706	1.04857e+06	0	200577	180214	265732
g	33	33	29	784.152	11.487	0.850177	[M-H]-	C12 PARENT	FAD	C00016	C27H33N9O15P2	3.51255	2.64643	784.152	0	36796.9	17503.4	0	16112.9	11128.4	39064.9	0	34587.8	15588	25781.2	6138.01	17026.1	14456.7	0	8370.82	26052.4	0	7467.65	0	42578.6	26060.1	28646.8	10540.4	0	20144.7	29764.5	11408.3	18277.7	25516.7	12153.6	0	29582.2	31706.4	17571.2
g	34	34	38	346.056	9.534	0.858289	[M-H]-	C12 PARENT	dGMP	C00362	C10H14N5O7P	1.46609	0.088187	346.056	5434.48	9027647	168061	5026488	11801271	2.84781e+06	9814982	12278.4	13733492	24919.8	1.36301e+06	6.84967e+06	465015	35530.1	12795.9	8.12161e+06	6042644	26425298	160160	10555.9	555792	11982.2	18381574	22541642	15454.6	30062.1	92918.6	0	8354.82	142624	3.04433e+06	8573.58	239139	345098	798670
g	35	35	39	505.988	11.967	0.854633	[M-H]-	C12 PARENT	ATP	C00002	C10H16N5O13P3	2.97315	1.08563	505.988	4562.29	129621	615308	652574	170769	80906.5	521321	5239.79	560108	85035.3	76986.8	800885	439400	75944.5	5636.25	1.93003e+06	148249	5400690	33194.1	6008.39	404753	11129.2	1.46915e+06	2436660	7270.78	31800.9	161342	3995.21	30276.3	205580	6.38618e+06	26935.1	449285	465686	452118
g	36	36	58	131.046	1.198	0.850804	[M-H]-	C12 PARENT	asparagine	C00152	C4H8N2O3	0.197718	0.815068	131.046	41609.8	6.84449e+06	11932855	6201664	9918025	10670885	6.50333e+06	96500	7.11456e+06	11464647	8813016	4943401	7.31975e+06	8111402	77829.4	5.63061e+06	5598218	5.04588e+06	8.11412e+06	93341.2	9560611	8957410	4.89015e+06	4968879	86753.1	7016188	7861896	10066512	7.62305e+06	8.34745e+06	5354138	82801.9	8303180	8425701	5.42759e+06
g	37	37	38	346.056	9.534	0.858289	[M-H]-	C12 PARENT	AMP	C00020	C10H14N5O7P	1.76609	0.088187	346.056	5434.48	9027647	168061	5026488	11801271	2.84781e+06	9814982	12278.4	13733492	24919.8	1.36301e+06	6.84967e+06	465015	35530.1	12795.9	8.12161e+06	6042644	26425298	160160	10555.9	555792	11982.2	18381574	22541642	15454.6	30062.1	92918.6	0	8354.82	142624	3.04433e+06	8573.58	239139	345098	798670
g	38	38	49	426.022	10.971	0.862202	[M-H]-	C12 PARENT	ADP	C00008	C10H15N5O10P2	2.82935	0.358169	426.022	5233.82	576245	366876	3174649	1.89193e+06	408547	1932986	16369.4	3.53035e+06	107767	270812	1202388	679662	90290	7207.12	2.8907e+06	1.36034e+06	17113282	102070	13990.6	469621	76115.8	9138100	6.42448e+06	18661.3	91807.8	290511	10584.1	75877.1	2.45913e+06	8555347	16595.2	1.00281e+06	835170	1.77445e+06
[truncated: 17 more columns]

## Sheet: S8
Name	group	2,3-Dihydroxybenzoate	aspartate	glutamate	glutamine	methionine	cystathionine	ornithine	arginine	a-ketoglutarate	succinate	fumarate	citrate	malate	valine	UTP	uridine	tyrosine	tryptophan	threonine	proline	phosphoenolpyruvate	phenylalanine	nicotinamide	lysine	L-leucine	histidine	guanosine	GTP	GMP	glutathione disulfide	glutathione	GDP	FAD	dGMP	ATP	asparagine	AMP	ADP
1	3xTg-PR_F	-2.30077	0.612483	1.05427	0.289435	0.130227	-0.4812	0.172265	0.242933	1.90113	1.20125	1.00993	0.0737657	1.03455	0.608367	0	1.20742	0.326022	0.484008	0.477397	0.363668	5.22291	0.548643	1.14142	0.166509	0.120519	-0.140006	1.5736	4.06533	6.62303	2.00532	0.870164	4.76912	-0.062964	7.72187	4.90675	0.428223	7.72187	5.14163
2	3xTg-PR_F	-3.39851	-1.50538	-1.62004	-0.395814	-1.18929	-0.672056	-0.0921756	-0.566106	-2.86406	-1.0156	-2.03933	-0.681796	-2.09523	-0.75015	0	-1.35373	-1.01049	-1.7104	-0.335826	-0.193069	-6.36873	-0.601182	-1.55176	-0.0262917	-0.220978	-0.326743	-0.803317	0	-6.57959	-2.9643	-0.667358	-5.39774	-0.756334	-8.07342	-7.89209	-0.463505	-8.07342	-4.81891
3	3xTg-PR_F	-0.482875	-1.16535	-1.09067	0.103233	-0.458887	-0.650704	0.340732	-0.168305	-1.47801	-0.421372	0.163545	-0.0881212	0.115227	-0.706455	0	-1.17862	-0.511881	-0.609177	0.468167	-0.313684	-5.17634	-0.820784	-0.0878273	-0.40818	-0.408301	-0.402221	-2.8294	0	-4.26335	-0.884738	-0.445622	-4.37813	-0.802877	-6.29048	-6.75407	0.0957142	-6.29048	-4.98119
4	3xTg-PR_F	-2.0798	-1.80246	-1.51082	-0.388094	-0.230947	-0.354247	-1.49972	-0.907136	-1.91915	-1.62696	-1.86858	-0.141388	-1.89402	-0.912825	0	-0.69535	-0.522001	-0.754433	-1.01915	-0.477452	-7.53166	-0.491701	-1.12256	-0.153829	-0.645355	-0.359014	-1.3387	0	0	-0.495931	-1.15366	0	-1.62933	0	-9.04905	-0.80391	0	-9.60443
5	3xTg-PR_F	0.607769	-0.422365	-0.944486	-0.0140324	-0.357061	0.787648	0.145327	-0.264048	-3.57197	-1.42995	-1.99659	-0.274532	-1.9873	-0.852454	0	-1.2218	-1.05816	-0.773456	-0.186449	0.0271067	-3.74866	-0.679701	-1.68661	-0.28461	-0.66441	-0.0402737	#NUM!	0	0	0.649882	0.32482	0	-0.410065	0	-5.34775	-0.164348	0	-3.63843
6	3xTg-PR_F	0.377382	-0.788771	-0.776385	0.169684	-0.389614	0.180666	0.340287	-0.299467	-2.631	-0.450302	-0.728488	-0.132592	-0.714851	-0.786	0	-0.866381	-0.236893	-0.589805	0.034395	-0.085068	-4.9718	-0.88863	-0.5479	-0.411693	-0.522204	-0.317262	-3.11605	0	-4.30933	1.01193	0.188611	-4.04761	-1.66519	-7.56757	-5.91379	-0.0247958	-7.56757	-4.25369
7	3xTg-PR-M	-1.12568	0.270409	-0.318955	-0.412561	-1.46683	0.609439	-0.0894217	-0.660889	-1.55137	-0.391805	0.418584	-0.329193	0.458467	-0.495082	0	-1.08462	-0.647107	-1.27817	-0.189461	-0.57614	0.854717	-0.42834	-0.94428	-0.582538	-0.606023	-0.504612	-1.35329	5.07798	0.23559	-2.85113	-1.16277	2.92138	-1.7767	0.866889	4.21515	-0.425638	0.866889	3.67373
8	3xTg-PR-M	-0.708922	-0.262791	0.446812	0.379843	1.17226	0.230487	0.374014	0.558859	1.42	0.987525	1.18426	0.411705	1.15975	0.37561	0	0.942041	1.03332	1.53636	0.35533	0.886895	-0.552285	0.483401	0.295705	0.247125	0.430395	0.0535156	0.608896	0	-0.345396	1.46406	0.287759	-1.51352	0.585329	-0.480369	-3.81741	0.960748	-0.480369	-1.95863
9	3xTg-PR-M	-0.313102	-0.531879	-0.472387	0.859781	0.697344	0.634988	0.443483	0.371331	-0.674438	-1.0181	0.160463	0.307832	0.0960637	0.442732	0	-0.638653	0.83436	1.43235	0.569188	0.661433	-3.28973	0.252788	0.359625	0.425737	0.414483	0.414947	-1.62148	0	-2.24743	-0.257366	0.335558	-3.22608	0.0513573	-2.53139	-4.89513	1.0663	-2.53139	-4.16992
10	3xTg-PR-M	-0.439232	-0.0964166	-0.424609	0.52648	0.991519	0.738928	0.248729	-0.284808	-1.77469	-1.28091	-0.0676354	0.240983	-0.112489	0.171569	0	-0.963759	0.228337	0.698635	0.673185	0.471967	-1.49113	-0.115315	0.465456	0.0610309	-0.0189416	0.120436	-0.531134	-1.95517	-0.965104	1.17371	0.90625	-1.35854	1.86298	-0.746254	-2.20728	0.351874	-0.746254	-1.92766
11	3xTg-PR-M	0.0798668	0.0789837	0.377622	-0.0879112	0.627599	0.682472	0.28821	0.0453338	0.725736	0.655258	1.06687	-0.109267	1.02775	0.761627	3.77243	1.1771	0.731175	0.568744	0.560737	-0.261758	0.824893	0.374371	-0.0299655	-0.122538	0.423914	-0.178194	-1.01079	4.83936	-0.120103	0.204433	-0.386045	1.43566	0.523239	-0.433314	3.7658	0.24555	-0.433314	0.69018
12	NTg-PR_F	-2.30077	0.612483	1.05427	0.289435	0.130227	-0.4812	0.172265	0.242933	1.90113	1.20125	1.00993	0.0737657	1.03455	0.608367	0	1.20742	0.326022	0.484008	0.477397	0.363668	5.22291	0.548643	1.14142	0.166509	0.120519	-0.140006	1.5736	4.06533	6.62303	2.00532	0.870164	4.76912	-0.062964	7.72187	4.90675	0.428223	7.72187	5.14163
13	NTg-PR_F	-3.39851	-1.50538	-1.62004	-0.395814	-1.18929	-0.672056	-0.0921756	-0.566106	-2.86406	-1.0156	-2.03933	-0.681796	-2.09523	-0.75015	0	-1.35373	-1.01049	-1.7104	-0.335826	-0.193069	-6.36873	-0.601182	-1.55176	-0.0262917	-0.220978	-0.326743	-0.803317	0	-6.57959	-2.9643	-0.667358	-5.39774	-0.756334	-8.07342	-7.89209	-0.463505	-8.07342	-4.81891
14	NTg-PR_F	-0.482875	-1.16535	-1.09067	0.103233	-0.458887	-0.650704	0.340732	-0.168305	-1.47801	-0.421372	0.163545	-0.0881212	0.115227	-0.706455	0	-1.17862	-0.511881	-0.609177	0.468167	-0.313684	-5.17634	-0.820784	-0.0878273	-0.40818	-0.408301	-0.402221	-2.8294	0	-4.26335	-0.884738	-0.445622	-4.37813	-0.802877	-6.29048	-6.75407	0.0957142	-6.29048	-4.98119
15	NTg-PR_F	-2.0798	-1.80246	-1.51082	-0.388094	-0.230947	-0.354247	-1.49972	-0.907136	-1.91915	-1.62696	-1.86858	-0.141388	-1.89402	-0.912825	0	-0.69535	-0.522001	-0.754433	-1.01915	-0.477452	-7.53166	-0.491701	-1.12256	-0.153829	-0.645355	-0.359014	-1.3387	0	0	-0.495931	-1.15366	0	-1.62933	0	-9.04905	-0.80391	0	-9.60443
16	NTg-PR_F	0.607769	-0.422365	-0.944486	-0.0140324	-0.357061	0.787648	0.145327	-0.264048	-3.57197	-1.42995	-1.99659	-0.274532	-1.9873	-0.852454	0	-1.2218	-1.05816	-0.773456	-0.186449	0.0271067	-3.74866	-0.679701	-1.68661	-0.28461	-0.66441	-0.0402737	0	0	0	0.649882	0.32482	0	-0.410065	0	-5.34775	-0.164348	0	-3.63843
17	NTg-PR_F	0.377382	-0.788771	-0.776385	0.169684	-0.389614	0.180666	0.340287	-0.299467	-2.631	-0.450302	-0.728488	-0.132592	-0.714851	-0.786	0	-0.866381	-0.236893	-0.589805	0.034395	-0.085068	-4.9718	-0.88863	-0.5479	-0.411693	-0.522204	-0.317262	-3.11605	0	-4.30933	1.01193	0.188611	-4.04761	-1.66519	-7.56757	-5.91379	-0.0247958	-7.56757	-4.25369
18	NTg-PR-M	-1.12568	0.270409	-0.318955	-0.412561	-1.46683	0.609439	-0.0894217	-0.660889	-1.55137	-0.391805	0.418584	-0.329193	0.458467	-0.495082	0	-1.08462	-0.647107	-1.27817	-0.189461	-0.57614	0.854717	-0.42834	-0.94428	-0.582538	-0.606023	-0.504612	-1.35329	5.07798	0.23559	-2.85113	-1.16277	2.92138	-1.7767	0.866889	4.21515	-0.425638	0.866889	3.67373
19	NTg-PR-M	-0.708922	-0.262791	0.446812	0.379843	1.17226	0.230487	0.374014	0.558859	1.42	0.987525	1.18426	0.411705	1.15975	0.37561	-2.32074	0.942041	1.03332	1.53636	0.35533	0.886895	-0.552285	0.483401	0.295705	0.247125	0.430395	0.0535156	0.608896	0	-0.345396	1.46406	0.287759	-1.51352	0.585329	-0.480369	-3.81741	0.960748	-0.480369	-1.95863
20	NTg-PR-M	-0.313102	-0.531879	-0.472387	0.859781	0.697344	0.634988	0.443483	0.371331	-0.674438	-1.0181	0.160463	0.307832	0.0960637	0.442732	-5.17636	-0.638653	0.83436	1.43235	0.569188	0.661433	-3.28973	0.252788	0.359625	0.425737	0.414483	0.414947	-1.62148	0	-2.24743	-0.257366	0.335558	-3.22608	0.0513573	-2.53139	-4.89513	1.0663	-2.53139	-4.16992
21	NTg-PR-M	-0.439232	-0.0964166	-0.424609	0.52648	0.991519	0.738928	0.248729	-0.284808	-1.77469	-1.28091	-0.0676354	0.240983	-0.112489	0.171569	-1.99779	-0.963759	0.228337	0.698635	0.673185	0.471967	-1.49113	-0.115315	0.465456	0.0610309	-0.0189416	0.120436	-0.531134	-1.95517	-0.965104	1.17371	0.90625	-1.35854	1.86298	-0.746254	-2.20728	0.351874	-0.746254	-1.92766
22	NTg-PR-M	0.673689	-0.427909	-0.403145	0.715553	0.19015	1.15964	-0.0801596	0.262703	-2.77036	-1.37439	-0.654972	0.102488	-0.651659	-0.224823	0	-0.704406	-0.339668	0.965369	-0.117063	0.378673	-0.930243	-0.295435	-0.274402	0.244821	-0.0908653	0.0708091	0.173658	0	0	1.11649	-0.648949	0	1.68738	0	-2.10375	0.481471	0	-1.05868
23	NTg-PR-M	-1.9244	-0.39768	-0.378688	0.516943	0.70425	0.719992	0.360592	-0.352915	-0.39189	-1.25164	0.226598	0.298866	0.191001	0.0547032	0	-0.877894	-0.152108	0.835711	0.371683	0.394996	-3.54	-0.211118	-0.239405	-0.00446804	-0.201607	-0.254385	0.290399	-5.75297	-2.13523	-1.17505	0.0551932	-3.36583	1.26343	-3.59444	-4.96677	0.790331	-3.59444	-4.76312

## Sheet: S9
Metabolic Pathway	Group	Direction	P-Value (not adjusted)	Log P-Value	Metabolic Pathway	Group	Direction	P-Value (not adjusted)	Log P-Value
Glycolysis / Gluconeogenesis	Female 3xTg vs 3xTg PR	Down	0.0009053	3.0432	Glycolysis / Gluconeogenesis	Female NTg vs NTg PR	Down	5.01e-05	4.3004
Cysteine and methionine metabolism	Female 3xTg vs 3xTg PR	Up	0.0014202	2.8477	Purine metabolism	Female NTg vs NTg PR	Down	0.0003662	3.4363
Folate biosynthesis	Female 3xTg vs 3xTg PR	Down	0.0014962	2.825	beta-Alanine metabolism	Female NTg vs NTg PR	Up	0.00076104	3.1186
Pyrimidine metabolism	Female 3xTg vs 3xTg PR	Down	0.0058465	2.2331	Folate biosynthesis	Female NTg vs NTg PR	Down	0.00096742	3.0144
Purine metabolism	Female 3xTg vs 3xTg PR	Down	0.010902	1.9625	Lysine degradation	Female NTg vs NTg PR	Up	0.0012469	2.9042
Glycine, serine and threonine metabolism	Female 3xTg vs 3xTg PR	Up	0.013809	1.8598	Biotin metabolism	Female NTg vs NTg PR	Up	0.0012469	2.9042
Pyruvate metabolism	Female 3xTg vs 3xTg PR	NA	NA	NA	Pyrimidine metabolism	Female NTg vs NTg PR	Down	0.0015953	2.7972
Arginine and proline metabolism	Female 3xTg vs 3xTg PR	NA	NA	NA	D-Glutamine and D-glutamate metabolism	Female NTg vs NTg PR	Up	0.0030417	2.5169
Histidine metabolism	Female 3xTg vs 3xTg PR	NA	NA	NA	Aminoacyl-tRNA biosynthesis	Female NTg vs NTg PR	Up	0.0058562	2.2324
Citrate cycle (TCA cycle)	Female 3xTg vs 3xTg PR	NA	NA	NA	Citrate cycle (TCA cycle)	Female NTg vs NTg PR	Up	0.0083937	2.076
beta-Alanine metabolism	Female 3xTg vs 3xTg PR	NA	NA	NA	Glycine, serine and threonine metabolism	Female NTg vs NTg PR	Up	0.0098124	2.0082
Glyoxylate and dicarboxylate metabolism	Female 3xTg vs 3xTg PR	NA	NA	NA	Cysteine and methionine metabolism	Female NTg vs NTg PR	Up	0.010907	1.9623
Nitrogen metabolism	Female 3xTg vs 3xTg PR	NA	NA	NA	Arginine biosynthesis	Female NTg vs NTg PR	Up	0.010939	1.961
Porphyrin and chlorophyll metabolism	Female 3xTg vs 3xTg PR	NA	NA	NA	Arginine and proline metabolism	Female NTg vs NTg PR	Up	0.012363	1.9079
Glutathione metabolism	Female 3xTg vs 3xTg PR	NA	NA	NA	Alanine, aspartate and glutamate metabolism	Female NTg vs NTg PR	Up	0.013037	1.8848
D-Glutamine and D-glutamate metabolism	Female 3xTg vs 3xTg PR	NA	NA	NA	Glyoxylate and dicarboxylate metabolism	Female NTg vs NTg PR	Up	0.013352	1.8744
Arginine biosynthesis	Female 3xTg vs 3xTg PR	NA	NA	NA	Valine, leucine and isoleucine degradation	Female NTg vs NTg PR	Up	0.015499	1.8097
Alanine, aspartate and glutamate metabolism	Female 3xTg vs 3xTg PR	NA	NA	NA	Valine, leucine and isoleucine biosynthesis	Female NTg vs NTg PR	Up	0.018592	1.7307
Valine, leucine and isoleucine degradation	Female 3xTg vs 3xTg PR	NA	NA	NA	Histidine metabolism	Female NTg vs NTg PR	Up	0.022961	1.639
Aminoacyl-tRNA biosynthesis	Female 3xTg vs 3xTg PR	NA	NA	NA	Phenylalanine, tyrosine and tryptophan biosynthesis	Female NTg vs NTg PR	Up	0.025464	1.5941
Butanoate metabolism	Female 3xTg vs 3xTg PR	NA	NA	NA	Phenylalanine metabolism	Female NTg vs NTg PR	Up	0.025464	1.5941
Valine, leucine and isoleucine biosynthesis	Female 3xTg vs 3xTg PR	NA	NA	NA	Nitrogen metabolism	Female NTg vs NTg PR	Up	0.029092	1.5362
Pantothenate and CoA biosynthesis	Female 3xTg vs 3xTg PR	NA	NA	NA	Pyruvate metabolism	Female NTg vs NTg PR	Down	0.041797	1.3789
Riboflavin metabolism	Female 3xTg vs 3xTg PR	NA	NA	NA	Ubiquinone and other terpenoid-quinone biosynthesis	Female NTg vs NTg PR	Up	0.058862	1.2302
Tryptophan metabolism	Female 3xTg vs 3xTg PR	NA	NA	NA	Glutathione metabolism	Female NTg vs NTg PR	NA	0.10506	0.97858
Ubiquinone and other terpenoid-quinone biosynthesis	Female 3xTg vs 3xTg PR	NA	NA	NA	Tyrosine metabolism	Female NTg vs NTg PR	NA	0.17628	0.75379
Propanoate metabolism	Female 3xTg vs 3xTg PR	NA	NA	NA	Butanoate metabolism	Female NTg vs NTg PR	NA	0.25177	0.599
Nicotinate and nicotinamide metabolism	Female 3xTg vs 3xTg PR	NA	NA	NA	Pantothenate and CoA biosynthesis	Female NTg vs NTg PR	NA	0.30808	0.51134
Phenylalanine, tyrosine and tryptophan biosynthesis	Female 3xTg vs 3xTg PR	NA	NA	NA	Tryptophan metabolism	Female NTg vs NTg PR	NA	0.32276	0.49112
Phenylalanine metabolism	Female 3xTg vs 3xTg PR	NA	NA	NA	Riboflavin metabolism	Female NTg vs NTg PR	NA	0.41447	0.38251
Lysine degradation	Female 3xTg vs 3xTg PR	NA	NA	NA	Porphyrin and chlorophyll metabolism	Female NTg vs NTg PR	NA	0.70926	0.14919
Biotin metabolism	Female 3xTg vs 3xTg PR	NA	NA	NA	Propanoate metabolism	Female NTg vs NTg PR	NA	0.74106	0.13015
Tyrosine metabolism	Female 3xTg vs 3xTg PR	NA	NA	NA	Nicotinate and nicotinamide metabolism	Female NTg vs NTg PR	NA	0.95011	0.022226
Arginine and proline metabolism	Male 3xTg vs 3xTg PR	Down	0.00085647	3.0673	Folate biosynthesis	Male NTg vs NTg PR	Down	0.00086171	3.0646
Aminoacyl-tRNA biosynthesis	Male 3xTg vs 3xTg PR	Down	0.012856	1.8909	Purine metabolism	Male NTg vs NTg PR	Down	0.0054605	2.2628
Cysteine and methionine metabolism	Male 3xTg vs 3xTg PR	Down	0.013812	1.8598	Tryptophan metabolism	Male NTg vs NTg PR	Up	0.0094397	2.025
Arginine biosynthesis	Male 3xTg vs 3xTg PR	Down	0.020671	1.6846	Glycolysis / Gluconeogenesis	Male NTg vs NTg PR	Down	0.010654	1.9725
Lysine degradation	Male 3xTg vs 3xTg PR	Down	0.030988	1.5088	Pyrimidine metabolism	Male NTg vs NTg PR	Down	0.01486	1.828
Biotin metabolism	Male 3xTg vs 3xTg PR	Down	0.030988	1.5088	Cysteine and methionine metabolism	Male NTg vs NTg PR	Up	0.038752	1.4117
Glyoxylate and dicarboxylate metabolism	Male 3xTg vs 3xTg PR	Down	0.033113	1.48	Riboflavin metabolism	Male NTg vs NTg PR	Up	0.040901	1.3883
Alanine, aspartate and glutamate metabolism	Male 3xTg vs 3xTg PR	Down	0.033851	1.4704	Aminoacyl-tRNA biosynthesis	Male NTg vs NTg PR	NA	NA	NA
Phenylalanine, tyrosine and tryptophan biosynthesis	Male 3xTg vs 3xTg PR	Down	0.037111	1.4305	Pyruvate metabolism	Male NTg vs NTg PR	NA	NA	NA
Phenylalanine metabolism	Male 3xTg vs 3xTg PR	Down	0.037111	1.4305	Arginine and proline metabolism	Male NTg vs NTg PR	NA	NA	NA
Tryptophan metabolism	Male 3xTg vs 3xTg PR	Down	0.046064	1.3366	Ubiquinone and other terpenoid-quinone biosynthesis	Male NTg vs NTg PR	NA	NA	NA
Glycine, serine and threonine metabolism	Male 3xTg vs 3xTg PR	NA	NA	NA	Glutathione metabolism	Male NTg vs NTg PR	NA	NA	NA
D-Glutamine and D-glutamate metabolism	Male 3xTg vs 3xTg PR	NA	NA	NA	Lysine degradation	Male NTg vs NTg PR	NA	NA	NA
Ubiquinone and other terpenoid-quinone biosynthesis	Male 3xTg vs 3xTg PR	NA	NA	NA	Biotin metabolism	Male NTg vs NTg PR	NA	NA	NA
Pyrimidine metabolism	Male 3xTg vs 3xTg PR	NA	NA	NA	Nitrogen metabolism	Male NTg vs NTg PR	NA	NA	NA
Valine, leucine and isoleucine biosynthesis	Male 3xTg vs 3xTg PR	NA	NA	NA	Glycine, serine and threonine metabolism	Male NTg vs NTg PR	NA	NA	NA
Valine, leucine and isoleucine degradation	Male 3xTg vs 3xTg PR	NA	NA	NA	Citrate cycle (TCA cycle)	Male NTg vs NTg PR	NA	NA	NA
Nicotinate and nicotinamide metabolism	Male 3xTg vs 3xTg PR	NA	NA	NA	Valine, leucine and isoleucine biosynthesis	Male NTg vs NTg PR	NA	NA	NA
beta-Alanine metabolism	Male 3xTg vs 3xTg PR	NA	NA	NA	Valine, leucine and isoleucine degradation	Male NTg vs NTg PR	NA	NA	NA
Purine metabolism	Male 3xTg vs 3xTg PR	NA	NA	NA	Phenylalanine, tyrosine and tryptophan biosynthesis	Male NTg vs NTg PR	NA	NA	NA
Citrate cycle (TCA cycle)	Male 3xTg vs 3xTg PR	NA	NA	NA	Phenylalanine metabolism	Male NTg vs NTg PR	NA	NA	NA
Nitrogen metabolism	Male 3xTg vs 3xTg PR	NA	NA	NA	Glyoxylate and dicarboxylate metabolism	Male NTg vs NTg PR	NA	NA	NA
Pantothenate and CoA biosynthesis	Male 3xTg vs 3xTg PR	NA	NA	NA	Alanine, aspartate and glutamate metabolism	Male NTg vs NTg PR	NA	NA	NA
Glutathione metabolism	Male 3xTg vs 3xTg PR	NA	NA	NA	Nicotinate and nicotinamide metabolism	Male NTg vs NTg PR	NA	NA	NA
Histidine metabolism	Male 3xTg vs 3xTg PR	NA	NA	NA	Tyrosine metabolism	Male NTg vs NTg PR	NA	NA	NA
Tyrosine metabolism	Male 3xTg vs 3xTg PR	NA	NA	NA	D-Glutamine and D-glutamate metabolism	Male NTg vs NTg PR	NA	NA	NA
Butanoate metabolism	Male 3xTg vs 3xTg PR	NA	NA	NA	Arginine biosynthesis	Male NTg vs NTg PR	NA	NA	NA
Folate biosynthesis	Male 3xTg vs 3xTg PR	NA	NA	NA	Propanoate metabolism	Male NTg vs NTg PR	NA	NA	NA
Propanoate metabolism	Male 3xTg vs 3xTg PR	NA	NA	NA	Pantothenate and CoA biosynthesis	Male NTg vs NTg PR	NA	NA	NA
Porphyrin and chlorophyll metabolism	Male 3xTg vs 3xTg PR	NA	NA	NA	beta-Alanine metabolism	Male NTg vs NTg PR	NA	NA	NA
Riboflavin metabolism	Male 3xTg vs 3xTg PR	NA	NA	NA	Histidine metabolism	Male NTg vs NTg PR	NA	NA	NA
Glycolysis / Gluconeogenesis	Male 3xTg vs 3xTg PR	NA	NA	NA	Butanoate metabolism	Male NTg vs NTg PR	NA	NA	NA
Pyruvate metabolism	Male 3xTg vs 3xTg PR	NA	NA	NA	Porphyrin and chlorophyll metabolism	Male NTg vs NTg PR	NA	NA	NA

## Sheet: S10
Females	3xTg	3xTg	3xTg	3xTg	3xTg	3xTg	3xTg-PR	3xTg-PR	3xTg-PR	3xTg-PR	3xTg-PR	3xTg-PR	3xTg	3xTg	3xTg	3xTg	3xTg	3xTg	3xTg-PR	3xTg-PR	3xTg-PR	3xTg-PR	3xTg-PR	3xTg-PR
	1R_Co	1L_Co	1N_Co	4L_Co	4R_Co	9R_Co	3R_Co	3L_Co	3N_Co	2R_Co	2N_Co	7R_Co	1R_Hi	1L_Hi	1N_Hi	4L_Hi	4R_Hi	9R_Hi	3R_Hi	3L_Hi	3N_Hi	2R_Hi	2N_Hi	7R_Hi
ACar 14:0	796.014	1077.55	1415.2	581.304	1367.85	750.185	919.025	1140.22	836.824	969.775	1247.42	1315.67	808.424	1091.58	1060.52	1409.06	1418.77	1475.16	1180.52	1701.01	1067.6	1550.43	1503.4	1052.76
ACar 16:0	1223.8	1353.1	1538.64	1218.9	1832.94	955.738	1201.37	1337.46	1091.63	2016.51	1709.72	1352.7	872.167	1349.33	1208.65	1837.46	2232.06	1725.89	1488.15	2002.44	1113.21	1857.46	1988.04	1276.58
ACar 16:1	425.534	341.429	316.948	276.099	459.134	254.839	340.744	379.49	353.908	433.352	451.168	362.075	285.123	554.021	419.328	448.193	492.644	605.268	476.205	624.668	354.108	482.069	511.768	376.631
ACar 18:0	533.276	589.838	766.267	711.369	778.415	484.981	413.98	545.271	692.635	523.971	779.739	623.759	589.31	546.897	517.621	912.163	909.496	1209.78	693.474	824.828	841.69	1008.59	631.61	773.285
ACar 18:1	878.278	1140.37	1170.74	1143.41	1646.71	752.247	951.56	1053.19	720.942	897.641	1504.62	937.089	360.471	360.471	360.471	360.471	360.471	360.471	360.471	360.471	360.471	360.471	360.471	360.471
ACar 20:4	876.661	950.475	868.61	976.857	895.897	570.65	864.215	986.344	649.699	827.208	1122	817.903	1293.6	1196.92	960.187	1428.57	925.502	873.608	1109.94	1298.2	977.824	1107.89	1591.63	926.492
Cer_ADS d40:0	0.0300813	0.0316396	0.030262	0.0281049	0.0239951	0.0248171	0.0272835	0.0264273	0.0278914	0.0258129	0.0207016	0.0232577	0.0305799	0.0293114	0.0191427	0.0234997	0.0275032	0.0209972	0.0272617	0.0219133	0.0297675	0.0280751	0.0259163	0.0194237
Cer_ADS d42:0	0.0229624	0.0232589	0.0258657	0.0180368	0.0141234	0.021987	0.0241611	0.0220618	0.0227846	0.0199766	0.0184024	0.0185578	0.0244478	0.0232672	0.0190026	0.0217408	0.016365	0.0183697	0.0229856	0.0213645	0.0235456	0.0182491	0.0189207	0.021804
Cer_NDS d16:0_26:1	0.0227642	0.0255538	0.0367222	0.0312782	0.0212001	0.0256987	0.0280005	0.0262996	0.0290595	0.0308872	0.0481433	0.0267784	0.0336691	0.0323293	0.0241524	0.0266687	0.0330929	0.0278669	0.0331657	0.0316452	0.0269798	0.0351744	0.0340154	0.0208113
Cer_NDS d18:0_18:0	0.0047374	0.00291116	0.00442568	0.00230708	0.00322974	0.0058167	0.00383836	0.00368911	0.00450306	0.00412322	0.00504996	0.00419888	0.00366349	0.00397919	0.00510991	0.00362332	0.00228077	0.00238492	0.00374713	0.00288174	0.00324041	0.00355567	0.00335433	0.00392803
Cer_NDS d43:2	0.00861286	0.0131394	0.0154882	0.00696219	0.012223	0.0100304	0.0111949	0.0117052	0.0112541	0.0108308	0.0128569	0.0110645	0.0125576	0.0166314	0.0120845	0.0144295	0.0205777	0.0184719	0.0176731	0.0173863	0.0137608	0.021505	0.0195199	0.0123574
Cer_NP t18:0_24:1	0.0288178	0.0332012	0.0310187	0.0279147	0.0258168	0.0288696	0.0291499	0.0270048	0.0281161	0.025392	0.039272	0.0242852	0.0318291	0.0326893	0.0193735	0.0285079	0.0297409	0.0245613	0.0329145	0.0248618	0.0310241	0.0298235	0.0464706	0.02484
Cer_NS d18:1_18:0	1.41548	1.10193	1.28024	0.417099	0.658524	1.58252	1.54174	1.14899	1.56771	1.32371	1.27763	1.11363	1.33861	1.14362	1.13336	1.30168	0.458453	0.779914	1.25889	1.16034	1.26667	1.13182	1.13266	1.12297
Cer_NS d18:1_21:0	0.0353621	0.0449331	0.0507997	0.0100836	0.0375247	0.0388021	0.0364266	0.0336967	0.0380905	0.0345606	0.0407653	0.0315104	0.0347016	0.0372382	0.0272658	0.0315276	0.040436	0.0475148	0.0353182	0.0392979	0.0387803	0.0489218	0.0347114	0.0271268
Cer_NS d18:1_23:0	0.026269	0.0240281	0.0357938	0.0142162	0.0205626	0.0285132	0.0277644	0.0252202	0.0346387	0.0282238	0.0327689	0.0231388	0.0269821	0.0257259	0.0209989	0.024805	0.0256282	0.029286	0.0310846	0.0313746	0.0244444	0.0304236	0.0255881	0.0214884
Cer_NS d18:1_24:1	0.00335745	0.00361673	0.00387844	0.00693374	0.00753694	0.00346799	0.00183634	0.00373093	0.00243977	0.00398028	0.00345691	0.00454234	0.00332242	0.00378038	0.00468329	0.00332341	0.00378523	0.0032498	0.00318847	0.00339407	0.00285995	0.00457207	0.00413476	0.00384414
Cer_NS d18:1_24:1_2	0.00401028	0.00348366	0.00379041	0.00505084	0.00501969	0.00469452	0.00287369	0.00405463	0.00368058	0.00452486	0.00440617	0.0040303	0.00331276	0.00380024	0.00469798	0.00332341	0.00378523	0.00325824	0.00314337	0.00339812	0.00287626	0.00461612	0.00413476	0.00384414
Cer_NS d18:2_18:0	0.0071913	0.00511709	0.00688712	0.0018452	0.00608559	0.00821846	0.00479832	0.00669872	0.00691946	0.00770519	0.00756436	0.00694005	0.00745992	0.0045432	0.00680601	0.0047788	0.00363932	0.0044743	0.00509934	0.00486613	0.00397139	0.00503196	0.00438973	0.00549616
Cer_NS d38:1	0.00505059	0.00294356	0.00380701	0.00303998	0.00465233	0.00473308	0.00326798	0.00502076	0.00462815	0.00492496	0.00473032	0.00422799	0.00147178	0.00147178	0.00147178	0.00147178	0.00147178	0.00147178	0.00147178	0.00147178	0.00147178	0.00147178	0.00147178	0.00147178
CL 72:4	0.0252222	0.0214467	0.0190476	0.0417006	0.0296433	0.0272155	0.0139966	0.0182897	0.0232968	0.0206264	0.0214424	0.0271682	0.00699831	0.00699831	0.00699831	0.00699831	0.00699831	0.00699831	0.00699831	0.00699831	0.00699831	0.00699831	0.00699831	0.00699831
CL 74:7	0.0133229	0.0125542	0.00983748	0.0141184	0.0154472	0.0162079	0.00822739	0.0134574	0.0135648	0.0103771	0.0124014	0.0140891	0.00411369	0.00411369	0.00411369	0.00411369	0.00411369	0.00411369	0.00411369	0.00411369	0.00411369	0.00411369	0.00411369	0.00411369
DG 16:0_18:1	0.00327119	0.00668679	0.00540299	0.0185052	0.0127799	0.00163559	0.0040283	0.0159279	0.00606427	0.00921399	0.0106865	0.0350602	0.00163559	0.00163559	0.00163559	0.00163559	0.00163559	0.00163559	0.00163559	0.00163559	0.00163559	0.00163559	0.00163559	0.00163559
DG 16:0_20:4	0.00523806	0.0057719	0.0106341	0.020986	0.0133236	0.00261903	0.00611215	0.0226038	0.0127412	0.0122726	0.0118223	0.0398562	0.028268	0.0120418	0.0184548	0.0191227	0.012886	0.0227458	0.0161896	0.0173978	0.0188796	0.00902912	0.0166989	0.00920308
DG 18:0_18:1	0.00286649	0.00490821	0.00733982	0.0142336	0.010525	0.00143325	0.00290725	0.0115994	0.00537262	0.0064326	0.00769378	0.0269485	0.00143325	0.00143325	0.00143325	0.00143325	0.00143325	0.00143325	0.00143325	0.00143325	0.00143325	0.00143325	0.00143325	0.00143325
EtherPC 16:0e_20:4	0.340664	0.243946	0.330514	0.221855	0.748004	0.2909	0.265223	0.282826	0.218782	0.239738	0.275951	0.270097	0.260657	0.339237	0.43104	0.335904	0.49625	0.415383	0.293025	0.212303	0.204032	0.307554	0.20068	0.243671
EtherPC 16:1e_16:0	0.872566	0.573991	0.666768	0.384304	0.785681	0.872656	0.646836	0.632558	0.568828	0.665506	0.887642	0.671206	0.508888	0.520317	0.709328	0.685536	0.523939	0.453424	0.563712	0.626676	0.460211	0.47685	0.531622	0.664862
EtherPC 18:0e_16:0	0.652112	0.469431	0.503826	0.482691	0.868825	0.550509	0.54508	0.564405	0.489222	0.492104	0.526769	0.574826	0.448207	0.414289	0.41973	0.554848	0.45469	0.37926	0.409186	0.368703	0.329122	0.401035	0.362623	0.376382
EtherPC 18:0e_18:1	0.480897	0.637467	0.582912	0.659499	1.45485	0.547421	0.312234	0.518186	0.300193	0.372702	0.389155	0.717943	0.326175	0.540176	0.500873	0.505542	1.08748	0.647137	0.55677	0.494674	0.351822	0.618551	0.513436	0.422161
EtherPC 18:1e_16:0	0.513252	0.530737	0.482539	0.527353	0.490373	0.394755	0.292824	0.549384	0.281347	0.309764	0.371828	0.6015	0.329015	0.450255	0.345885	0.412539	0.653348	0.542862	0.476346	0.31158	0.342643	0.450008	0.419949	0.331467
EtherPC 18:1e_16:0_2	2.35936	1.72986	1.82608	1.21365	3.43049	2.18696	2.09272	2.04803	1.70282	1.88185	1.95695	2.18286	1.73062	1.69132	2.01298	2.30299	1.99414	1.69183	1.63601	1.70871	1.24491	1.64572	1.60803	1.72858
EtherPC 18:1e_20:4	0.275832	0.269359	0.183417	0.192387	0.367132	0.376741	0.196045	0.211814	0.207399	0.231041	0.275094	0.348837	0.178261	0.208667	0.286675	0.257294	0.201562	0.226381	0.244493	0.231851	0.149418	0.179727	0.188363	0.207374
EtherPE 16:1e_20:4	13.5678	11.9598	15.6038	7.66045	16.551	17.1563	13.6445	10.0649	11.7379	12.276	12.0428	12.3976	9.65548	9.03794	10.7324	11.7221	11.8207	8.63079	11.0463	11.3517	7.73013	9.24213	7.88586	10.0505
EtherPE 16:1e_22:4	11.6511	9.44754	10.1227	4.34791	14.8626	14.3217	11.9555	9.20476	9.61113	10.5769	8.84857	11.1452	9.00399	8.89872	11.7492	12.1112	9.0489	9.32731	8.97706	8.99219	6.05519	8.47853	6.19893	9.72233
EtherPE 16:1e_22:6	33.4442	24.4358	27.052	15.5764	38.0214	32.766	25.9407	26.3605	22.1195	24.2823	25.4376	27.9702	21.6367	22.9998	27.3407	28.4137	23.6062	20.5883	23.3764	22.1916	18.9154	21.9156	21.2235	26.0242
EtherPE 18:1e_18:1	15.8374	19.5266	17.9802	26.0701	41.2499	15.8836	10.1845	17.114	8.74523	13.0318	14.1523	20.1217	10.6082	14.9258	13.5536	15.1565	30.8578	16.9974	15.6101	14.5371	12.3976	17.1935	16.1139	13.5306
EtherPE 18:1e_20:1	7.20411	8.98295	8.18869	16.3204	20.9665	6.49261	3.81398	7.30715	3.5655	5.57638	6.34087	9.60147	4.78895	6.98123	6.51391	7.54591	19.1915	9.30885	6.82935	6.31686	5.08382	7.68714	7.25474	6.13279
EtherPE 18:1e_20:4	22.7445	15.5812	18.9124	10.4065	21.4117	22.6621	17.2686	18.464	13.853	19.0403	17.8555	15.6849	16.2323	12.1295	12.9234	16.0625	11.7039	13.8444	14.9706	15.2902	11.2392	11.4507	12.0814	15.5889
EtherPE 18:1e_22:6	41.1227	25.3857	25.9627	26.5033	41.4872	30.6755	27.0914	32.6456	23.9574	28.2755	29.5431	31.0931	24.9269	24.7545	30.7488	34.5443	25.344	22.6545	24.1929	24.8953	22.2636	22.9272	24.7886	28.1152
EtherPE 18:2e_18:1	18.604	20.6044	18.236	25.5851	41.1851	17.8246	11.7878	18.881	9.88712	14.1512	16.1367	21.4514	11.8935	16.5547	17.4618	16.9887	24.2864	18.107	17.081	16.0833	11.8468	16.8535	16.8705	15.5575
EtherPE 18:2e_20:4	16.639	17.4185	16.1515	13.3051	33.2565	16.451	12.5755	15.4271	10.6874	13.8999	13.9449	18.1127	12.3091	15.2495	16.2586	16.0496	22.8591	16.1437	13.985	13.5209	10.4278	15.6732	12.9589	13.584
EtherPE 18:2e_22:4	12.5595	11.2595	11.0976	11.384	25.3117	10.4232	7.67437	11.4253	6.90208	9.37588	9.35209	13.1757	8.62429	10.8765	13.195	12.737	16.5578	12.2436	9.20664	9.28241	6.88324	11.0375	8.85245	10.0828
EtherPE 18:2e_22:6	14.482	10.8279	10.1352	6.66158	18.406	11.6949	9.13006	11.5003	8.16214	9.28081	10.2788	11.7299	9.10323	10.0461	10.993	12.8039	11.1258	9.68702	9.02441	8.88324	7.54558	9.06611	8.98579	10.1204
EtherPE 22:5e_22:6	2.84516	2.81994	3.64216	1.44229	4.47331	2.78659	2.84478	2.86495	2.49718	1.89099	2.37404	3.35857	2.64604	3.56427	2.47123	3.60446	4.68125	3.42625	2.81834	2.21649	1.88767	3.11114	2.17013	2.26707
HexCer_AP t58:2	0.0476921	0.0477869	0.0608464	0.0359122	0.0620778	0.0462106	0.0348121	0.0490857	0.0387223	0.0320787	0.0541587	0.0674442	0.0433803	0.0658824	0.0572767	0.0506483	0.0741979	0.0507685	0.0582962	0.0583485	0.0463951	0.0556172	0.0629307	0.0509329
HexCer_AP t58:3	0.0485696	0.0621208	0.0538731	0.0425593	0.0786985	0.0469202	0.0352823	0.0479021	0.0413884	0.0463716	0.052047	0.0678336	0.0446034	0.06425	0.0576076	0.0476516	0.0770153	0.0544589	0.0549223	0.0515796	0.044491	0.071636	0.0717369	0.0403928
HexCer_AP t60:3	0.0470267	0.0850808	0.0625447	0.0710894	0.0698464	0.0468107	0.0385507	0.0579182	0.0373199	0.0470563	0.0477652	0.0818128	0.0491351	0.0725215	0.0613357	0.056613	0.0959968	0.0613813	0.063545	0.0587684	0.0536794	0.0761647	0.0710086	0.0530475
HexCer_NDS d40:1	0.618823	0.862838	0.835222	0.781382	1.01796	0.620218	0.413354	0.741913	0.47152	0.641166	0.662616	0.821636	0.660563	0.946195	0.744576	0.710719	1.08115	0.898226	0.720214	0.725167	0.713137	0.91346	0.824577	0.647418
HexCer_NDS d40:2	0.176077	0.333472	0.275901	0.211489	0.429285	0.209839	0.14967	0.225194	0.136152	0.181984	0.185163	0.250792	0.222037	0.378745	0.276297	0.223121	0.415068	0.366508	0.261923	0.241486	0.212416	0.366023	0.256274	0.187761
HexCer_NDS d41:1	0.46919	0.526068	0.531242	0.453646	0.541132	0.439677	0.338267	0.475551	0.403767	0.469759	0.488189	0.505198	0.432471	0.555437	0.486839	0.468193	0.591811	0.523672	0.482841	0.519583	0.503256	0.556401	0.551581	0.440996
HexCer_NDS d42:2	5.30654	8.71697	8.29745	8.18781	10.0192	5.77979	4.63704	7.65985	4.23517	6.24496	5.95079	7.84493	5.65086	8.13518	6.88801	5.92341	11.177	8.77421	8.28726	7.60666	7.48847	10.8507	9.03631	6.32087
HexCer_NS d18:1_16:0	0.00480951	0.00567879	0.00629387	0.00501408	0.0100755	0.00604862	0.00338034	0.00489644	0.00405501	0.00456789	0.00527889	0.00567591	0.00360439	0.0075036	0.00696761	0.00467086	0.00615017	0.0057982	0.00519668	0.00494293	0.00338396	0.00667792	0.00514026	0.00474162
HexCer_NS d18:1_18:0	0.0687258	0.0528628	0.0460855	0.0152386	0.0873055	0.0667461	0.0412666	0.0152386	0.0152386	0.0608685	0.0703481	0.0672188	0.0415841	0.0382992	0.0905626	0.0304772	0.0152386	0.0514836	0.0152386	0.0509207	0.0152386	0.0152386	0.0485767	0.063218
HexCer_NS d18:1_20:0	0.0127496	0.0160465	0.0157159	0.0229759	0.0318313	0.0135325	0.00827085	0.0144079	0.00807107	0.0155997	0.0125884	0.0162737	0.0120539	0.0212638	0.0219134	0.0156173	0.0266396	0.0232603	0.0165897	0.0153664	0.0129736	0.0238216	0.0155557	0.0128528
HexCer_NS d18:1_22:0	0.0188544	0.024623	0.012182	0.0372296	0.047285	0.0212184	0.0168721	0.0236985	0.010533	0.0213287	0.0232847	0.0268339	0.0198457	0.0304368	0.0298068	0.0206925	0.0258118	0.0275142	0.0212525	0.0177089	0.0190217	0.0267579	0.0135597	0.0171299
HexCer_NS d18:1_22:1	0.0446708	0.035963	0.037747	0.0457083	0.0612034	0.0447139	0.0239871	0.0372146	0.0290669	0.0357485	0.0369511	0.0364958	0.032384	0.0389973	0.0440563	0.0336325	0.0460349	0.0376733	0.0316038	0.0381447	0.0278008	0.0381999	0.0359715	0.0358785
HexCer_NS d18:1_22:1_2	0.00400949	0.0213572	0.0172737	0.0265958	0.0509001	0.0170048	0.00810289	0.015494	0.00801898	0.0161261	0.0161372	0.0191168	0.0157848	0.0329192	0.0251627	0.016436	0.0483699	0.0345654	0.0164456	0.0234519	0.01558	0.0328237	0.0200605	0.00400949
HexCer_NS d18:1_23:0	0.0186181	0.0169397	0.0159386	0.0290561	0.0280566	0.0197295	0.00982086	0.0167111	0.0132746	0.0158517	0.0181568	0.0179367	0.0132317	0.0167568	0.0182777	0.0141888	0.0190413	0.0173638	0.0154602	0.0126784	0.0108067	0.0153649	0.0148153	0.0121141
HexCer_NS d18:1_23:1	0.0221308	0.0137883	0.0048249	0.0197827	0.0222829	0.0192582	0.00964981	0.0171537	0.0145626	0.0166717	0.0175479	0.0172074	0.0150668	0.0172043	0.0209682	0.0146513	0.0185959	0.0172421	0.015361	0.0167572	0.0135299	0.0170939	0.0175906	0.0179412
HexCer_NS d18:1_24:0	1.05061	1.47242	1.56591	2.01758	1.73392	0.993257	0.771073	1.38583	0.867244	1.1881	1.3073	1.59428	0.385536	0.385536	0.385536	0.385536	0.385536	0.385536	0.385536	0.385536	0.385536	0.385536	0.385536	0.385536
HexCer_NS d18:1_24:1	0.0249489	0.0188341	0.0265865	0.0331831	0.0296037	0.0238118	0.0157087	0.0283598	0.0205728	0.0264514	0.025689	0.0235748	0.0175086	0.0176768	0.0256916	0.0183902	0.0246894	0.0186666	0.0185673	0.0198244	0.0177491	0.0197096	0.0209559	0.0214753
HexCer_NS d18:1_24:2	0.0454154	0.0629037	0.0580236	0.0901705	0.114305	0.0546213	0.0326198	0.0577599	0.0377091	0.0536464	0.0496746	0.0585525	0.0416388	0.0591173	0.0622373	0.0475906	0.121766	0.0664006	0.0593376	0.0603583	0.0420653	0.0891967	0.0613476	0.0511999
HexCer_NS d34:1	0.00851245	0.00966936	0.0106468	0.00790978	0.0158096	0.00990363	0.0069733	0.00951337	0.00863418	0.00683305	0.00958144	0.0109423	0.0179457	0.0232629	0.023152	0.017102	0.023654	0.0278964	0.020396	0.0185475	0.0155295	0.0286492	0.0213389	0.0152562
HexCer_NS d36:1	0.131022	0.180255	0.16159	0.163151	0.202015	0.129153	0.102243	0.15901	0.115302	0.144277	0.147858	0.173203	0.10673	0.175606	0.129449	0.113192	0.161565	0.171026	0.151756	0.144595	0.119017	0.190135	0.149024	0.121998
HexCer_NS d38:1	0.141135	0.17955	0.173742	0.140539	0.225638	0.131693	0.102872	0.146667	0.107073	0.13873	0.132095	0.176476	0.160933	0.22828	0.182836	0.162938	0.193364	0.213143	0.152134	0.144791	0.153917	0.213033	0.166752	0.138549
HexCer_NS d40:5	0.00206291	0.00412583	0.00206291	0.0157179	0.00206291	0.00206291	0.00206291	0.00206291	0.00206291	0.00206291	0.00206291	0.00206291	0.00206291	0.00206291	0.00206291	0.00206291	0.00206291	0.00206291	0.00206291	0.00206291	0.00206291	0.00206291	0.00206291	0.00206291
HexCer_NS d42:3	0.192722	0.259281	0.29664	0.151533	0.302075	0.20403	0.194614	0.285553	0.19004	0.22457	0.208455	0.256359	0.227357	0.269032	0.249395	0.214488	0.371094	0.303496	0.268825	0.24963	0.280917	0.381061	0.337729	0.228627
HexCer_NS d43:1	0.0501849	0.0719774	0.0801043	0.0881375	0.0779726	0.052042	0.0418305	0.0690521	0.0467039	0.0732067	0.0803523	0.0803858	0.0533856	0.0681479	0.0644021	0.0640919	0.105649	0.081187	0.0961293	0.0836361	0.0874979	0.0991074	0.101383	0.0614737
LPC 0:0/16:0	0.00573878	0.00909934	0.00730077	0.00912319	0.00727654	0.00706529	0.00647318	0.008149	0.00722187	0.00658142	0.00941423	0.00827657	0.00517866	0.00872141	0.00768497	0.00609092	0.00607944	0.00626144	0.00697776	0.00765395	0.00440543	0.00918028	0.00699905	0.00499931
LPC 0:0/18:1	0.00674175	0.013977	0.0117161	0.0112035	0.00955456	0.0111785	0.00915741	0.0128038	0.00931942	0.00972965	0.00877344	0.00954447	0.00668034	0.0137391	0.00861346	0.00865441	0.0131378	0.0103764	0.0100394	0.0107445	0.00627432	0.0182595	0.00941289	0.00763431
LPC 0:0/22:6	0.00400178	0.00518324	0.00411929	0.00535152	0.00340841	0.00398931	0.00264768	0.00413124	0.00367387	0.00439536	0.0027988	0.0032059	0.00132384	0.00132384	0.00132384	0.00132384	0.00132384	0.00132384	0.00132384	0.00132384	0.00132384	0.00132384	0.00132384	0.00132384
LPC 16:0/0:0	0.0165256	0.0294213	0.0239912	0.0181161	0.0242088	0.0262308	0.0238884	0.0223074	0.0221252	0.0264807	0.0173	0.0243918	1.36687	1.60353	1.34392	1.33078	1.26335	1.45547	1.13046	1.25639	1.01064	1.33151	0.876449	1.07319
LPC 18:0/0:0	0.0155481	0.0299921	0.0292077	0.0236685	0.0244346	0.024161	0.0215935	0.0213965	0.0214247	0.0267829	0.0191886	0.0311975	0.0194158	0.0315514	0.0286274	0.0218409	0.0231916	0.0319909	0.0231731	0.0284297	0.0181837	0.0289355	0.0237628	0.0213116
LPC 18:1/0:0	0.0060789	0.0127342	0.0120865	0.0109261	0.0108336	0.0100042	0.00900188	0.00964396	0.00853431	0.0106376	0.00694071	0.00903616	0.00745705	0.0111987	0.00874278	0.00945934	0.0144193	0.00978463	0.010704	0.0117402	0.00784381	0.0106579	0.0126378	0.0109855
LPC 20:4/0:0	0.00271773	0.00485063	0.00375402	0.00335918	0.00234562	0.00370274	0.00294344	0.00305301	0.00348117	0.0043125	0.00315934	0.00241089	0.00117281	0.00117281	0.00117281	0.00117281	0.00117281	0.00117281	0.00117281	0.00117281	0.00117281	0.00117281	0.00117281	0.00117281
LPE 17:0	0.0214618	0.0164912	0.0230817	0.0261316	0.0356396	0.0250405	0.0164389	0.0188598	0.0158239	0.0194478	0.0187445	0.0178379	0.0144488	0.0133806	0.0114346	0.0166715	0.022523	0.0158	0.0155239	0.0121905	0.0121168	0.017252	0.0112642	0.0125726
LPE 18:2	0.0605472	0.0672423	0.0643986	0.101434	0.0934756	0.0629951	0.049586	0.0647229	0.0441662	0.0462651	0.0602229	0.0691921	0.0220831	0.0220831	0.0220831	0.0220831	0.0220831	0.0220831	0.0220831	0.0220831	0.0220831	0.0220831	0.0220831	0.0220831
OxPI 16:0_20:4+3O	0.189923	0.134085	0.0771453	0.13234	0.0918649	0.116651	0.0805226	0.17333	0.0854653	0.168442	0.104618	0.125924	0.0385727	0.0385727	0.0385727	0.0385727	0.0385727	0.0385727	0.0385727	0.0385727	0.0385727	0.0385727	0.0385727	0.0385727
PA 21:1_20:4	0.00498589	0.00395092	0.0109182	0.00422343	0.00369993	0.0074635	0.0181121	0.0079257	0.00713473	0.00738552	0.0183018	0.00482307	0.00184997	0.00184997	0.00184997	0.00184997	0.00184997	0.00184997	0.00184997	0.00184997	0.00184997	0.00184997	0.00184997	0.00184997
PC 15:0_16:0	0.0188521	0.0189591	0.0156204	0.0202584	0.0162184	0.0164724	0.0118371	0.0213735	0.0143783	0.0166174	0.0163511	0.0146722	0.0177403	0.0139697	0.0155024	0.0166767	0.0124033	0.0124202	0.0158911	0.015551	0.0151926	0.0151174	0.020509	0.013568
PC 15:0_18:0	0.0554461	0.0597327	0.0565869	0.0385498	0.0689277	0.0780583	0.0627361	0.0543817	0.0677884	0.062955	0.0607031	0.0696959	0.0192749	0.0192749	0.0192749	0.0192749	0.0192749	0.0192749	0.0192749	0.0192749	0.0192749	0.0192749	0.0192749	0.0192749
PC 16:0_16:0	4.11336	3.1967	2.76051	2.50847	3.12773	3.76569	2.62644	3.48657	3.36868	3.59344	3.57881	3.47727	3.85373	3.15412	3.64577	3.07137	1.74795	2.39003	3.38771	2.94612	3.17202	2.51993	3.13121	3.79451
PC 16:0_16:1	0.297115	0.289893	0.210496	0.174665	0.261332	0.250645	0.197879	0.291896	0.255919	0.233927	0.215304	0.242109	0.264521	0.221908	0.237611	0.239888	0.207767	0.220867	0.256472	0.230637	0.235574	0.207007	0.19731	0.23139
PC 16:0_18:0	0.811504	0.626685	0.604624	0.777444	0.632742	0.668432	0.543305	0.703941	0.708145	0.6884	0.740001	0.672939	0.737598	0.578683	0.660746	0.812874	0.4387	0.542954	0.664456	0.71237	0.668182	0.52692	0.654265	0.697446
PC 16:0_18:1	5.91558	4.85753	4.10299	6.30606	6.65221	5.39245	3.36022	5.09448	4.24085	4.9833	5.05497	5.36516	10.0918	11.4019	14.4163	14.6703	15.6109	11.67	2.61057	1.30529	8.91698	11.0241	10.4353	1.30529
PC 16:0_18:2	0.19951	0.188305	0.149059	0.158092	0.154043	0.13981	0.164052	0.205907	0.186104	0.172396	0.247541	0.174904	0.167104	0.172047	0.144923	0.181052	0.141526	0.148532	0.182731	0.192016	0.200503	0.163324	0.262594	0.16287
PC 16:0_19:1	0.116409	0.141508	0.11249	0.17855	0.206126	0.0924283	0.0684562	0.117449	0.0811764	0.0950726	0.0994009	0.129584	0.0342281	0.0342281	0.0342281	0.0342281	0.0342281	0.0342281	0.0342281	0.0342281	0.0342281	0.0342281	0.0342281	0.0342281
PC 16:0_20:4	1.72826	1.46099	1.3499	0.790613	1.17202	1.45814	1.36795	1.51365	1.53413	1.55941	1.38078	1.48207	6.36499	7.29206	9.63966	9.07666	7.20471	6.89392	7.09519	7.28868	5.18468	6.60802	5.90956	8.1745
PC 16:0_22:4	0.0937746	0.0891427	0.0798372	0.0526229	0.0854618	0.099458	0.0806633	0.0863457	0.0837743	0.0797468	0.0911284	0.0688732	0.0263114	0.0263114	0.0263114	0.0263114	0.0263114	0.0263114	0.0263114	0.0263114	0.0263114	0.0263114	0.0263114	0.0263114
PC 16:0_22:5	0.0664916	0.0241512	0.0592847	0.0772791	0.0882608	0.0625196	0.0625688	0.0241512	0.0483024	0.048341	0.0241512	0.0637292	0.0241512	0.0241512	0.0241512	0.0241512	0.0241512	0.0241512	0.0241512	0.0241512	0.0241512	0.0241512	0.0241512	0.0241512
PC 16:0_22:6	0.564734	0.226236	0.399549	0.942119	0.431253	0.311676	0.312041	0.479336	0.377647	0.383369	0.379217	0.401775	9.83463	9.74645	10.8442	13.4997	12.6297	10.0582	10.4089	9.53936	9.59027	10.057	11.2583	10.3299
PC 17:0_16:1	0.0288666	0.0312748	0.0302713	0.0305245	0.039625	0.0364963	0.0230132	0.0274113	0.0307603	0.033346	0.0328809	0.0259141	0.0115066	0.0115066	0.0115066	0.0115066	0.0115066	0.0115066	0.0115066	0.0115066	0.0115066	0.0115066	0.0115066	0.0115066
PC 18:0_18:1	1.57769	1.97986	1.50876	2.66745	2.77418	1.35486	1.00655	1.60271	1.27962	1.38838	1.4943	1.85552	1.51884	1.78515	1.80381	1.76986	2.41722	1.9725	1.55591	1.93474	1.40545	1.70942	1.55273	1.71578
PC 18:0_20:4	0.782504	0.693894	0.64277	0.551609	0.800442	0.854666	0.615114	0.657666	0.700094	0.741502	0.73582	0.76199	0.789846	0.719527	0.918566	0.676588	0.479785	0.581209	0.704656	0.692347	0.614001	0.540943	0.596684	0.819128
PC 18:0_22:6	0.375962	0.357413	0.342772	1.1511	0.362533	0.277509	0.254566	0.3165	0.305198	0.275322	0.304774	0.284038	0.327756	0.274662	0.254858	0.356693	0.424154	0.300364	0.32052	0.337122	0.345061	0.283196	0.335272	0.281247
PC 18:1_20:1	0.0721533	0.0696701	0.0462645	0.156566	0.0800431	0.0376676	0.0203051	0.0434847	0.0237465	0.0274942	0.0378721	0.0657135	0.0474186	0.046323	0.0498909	0.0433755	0.0900906	0.0452864	0.0374333	0.0448527	0.0420817	0.0304623	0.0493364	0.0469592
PC 18:1_20:4	0.41752	0.378067	0.344278	0.235146	0.315516	0.421113	0.350544	0.366244	0.395246	0.362457	0.370216	0.357845	0.396435	0.389365	0.416504	0.366168	0.238182	0.291454	0.372637	0.366797	0.325784	0.307386	0.324208	0.399802
PC 18:1_22:6	0.101283	0.0930042	0.0821983	0.199054	0.0892511	0.0699655	0.0620316	0.0801753	0.0763681	0.0719177	0.0754574	0.0669322	0.0793359	0.0738528	0.0657496	0.0831396	0.0942637	0.065712	0.0804033	0.079615	0.0889592	0.0725149	0.0929871	0.0762937
PC 22:4_22:6	0.0336044	0.0330553	0.021707	0.0542086	0.0363318	0.0270093	0.00904581	0.0276411	0.0213059	0.0252314	0.0321294	0.0366685	0.029378	0.0303453	0.0308774	0.0229126	0.0270867	0.0290184	0.0252588	0.0234983	0.0316288	0.024356	0.0268215	0.0294081
PC 22:6_22:6	0.00940146	0.00734017	0.00668617	0.0329169	0.0121926	0.0080835	0.00435778	0.00765682	0.00610009	0.00739421	0.00705113	0.00911453	0.00883278	0.00944935	0.008608	0.00622687	0.0112245	0.00684084	0.00825151	0.00665564	0.00752065	0.00734605	0.0098812	0.00862297
PC 30:0	0.0869397	0.0802854	0.0718293	0.0632531	0.0808666	0.0701584	0.0567091	0.0871853	0.0682035	0.0769094	0.0752652	0.0781776	0.0283546	0.0283546	0.0283546	0.0283546	0.0283546	0.0283546	0.0283546	0.0283546	0.0283546	0.0283546	0.0283546	0.0283546
PC 31:0	0.00506052	0.0165416	0.0121415	0.00506052	0.00506052	0.0126858	0.010121	0.0201581	0.0106101	0.0140391	0.0137644	0.0106343	0.00506052	0.00506052	0.00506052	0.00506052	0.00506052	0.00506052	0.00506052	0.00506052	0.00506052	0.00506052	0.00506052	0.00506052
PC 34:3	0.0175777	0.0140814	0.00971266	0.0226663	0.0187683	0.0172617	0.0109784	0.0122344	0.0120181	0.0118634	0.0158734	0.0129507	0.0147052	0.0121993	0.0176671	0.0100605	0.0123029	0.011438	0.0124642	0.00997851	0.0126461	0.0107614	0.0124304	0.0128234
PC 34:4	0.00301974	0.00603948	0.00301974	0.00997747	0.00301974	0.00301974	0.0106674	0.0112076	0.00818997	0.00986655	0.0111417	0.0144311	0.00301974	0.00301974	0.00301974	0.00301974	0.00301974	0.00301974	0.00301974	0.00301974	0.00301974	0.00301974	0.00301974	0.00301974
PC 35:4	0.0243875	0.0178878	0.0142998	0.0189837	0.020753	0.0186605	0.013475	0.0201137	0.0173784	0.0198467	0.0179172	0.0209064	0.0189591	0.0168469	0.0205571	0.013615	0.0144671	0.0145665	0.0210818	0.0120519	0.0171263	0.0133559	0.0189739	0.0198429
PC 36:0	0.0190975	0.00444947	0.0162412	0.0369483	0.00444947	0.0205712	0.00889894	0.0185122	0.0136341	0.0162263	0.0201009	0.00444947	0.0158262	0.0220244	0.0347502	0.0178352	0.0337436	0.0219455	0.0230741	0.0211835	0.0174017	0.0232497	0.0214603	0.024323
PC 36:3	0.439395	0.0521276	0.0521276	0.104255	0.317386	0.0521276	0.262818	0.0521276	0.0521276	0.0521276	0.0521276	0.0521276	0.0521276	0.0521276	0.0521276	0.0521276	0.0521276	0.0521276	0.0521276	0.0521276	0.0521276	0.0521276	0.0521276	0.0521276
PC 37:4	0.0189734	0.0176374	0.0148007	0.0165561	0.021484	0.0164745	0.0117601	0.0154452	0.0136318	0.0132822	0.0159575	0.0159232	0.0146705	0.0166719	0.018805	0.0125792	0.0156498	0.0136715	0.0155656	0.0121316	0.015015	0.0151132	0.0159559	0.0175404
PC 38:3	0.0234174	0.0269101	0.027887	0.0497277	0.0328302	0.024955	0.0243214	0.0288442	0.0251187	0.0280568	0.0282315	0.0309666	0.0117087	0.0117087	0.0117087	0.0117087	0.0117087	0.0117087	0.0117087	0.0117087	0.0117087	0.0117087	0.0117087	0.0117087
PC 39:6	0.011438	0.00287013	0.0105517	0.016451	0.00995226	0.00287013	0.00574026	0.0104114	0.00925048	0.0089638	0.010004	0.00959051	0.0113684	0.0106679	0.00918873	0.00919449	0.011804	0.00985325	0.0119092	0.00873073	0.0135226	0.00771482	0.013277	0.01187
PC 40:1	0.0140143	0.0159807	0.0124865	0.0354048	0.0276688	0.0153867	0.00836099	0.0160742	0.0106034	0.0112473	0.0158829	0.018586	0.0111924	0.0156956	0.0202071	0.0113445	0.0203105	0.0143281	0.01377	0.00962568	0.0134679	0.00972493	0.0157044	0.0183689
PC 40:4	0.0846219	0.101408	0.104714	0.0950994	0.111826	0.0780622	0.0648142	0.0759137	0.0759094	0.0772083	0.0963305	0.0795279	0.0692573	0.0669814	0.0662432	0.0666327	0.0859939	0.0845362	0.0793048	0.0781337	0.0821538	0.0714032	0.0583606	0.0733733
PC 40:5	0.00612247	0.0192149	0.0219399	0.0393433	0.0173088	0.0122449	0.00612247	0.0228914	0.00612247	0.0146368	0.0191197	0.0226311	0.00612247	0.00612247	0.00612247	0.00612247	0.00612247	0.00612247	0.00612247	0.00612247	0.00612247	0.00612247	0.00612247	0.00612247
PC 41:1	0.00400979	0.00169083	0.00606153	0.0165064	0.0103559	0.00370228	0.00169083	0.0041172	0.00338166	0.00169083	0.00546273	0.00674803	0.00169083	0.00169083	0.00169083	0.00169083	0.00169083	0.00169083	0.00169083	0.00169083	0.00169083	0.00169083	0.00169083	0.00169083
PC 41:2	0.00128931	0.00714106	0.0060742	0.0116921	0.0125836	0.00128931	0.00128931	0.00612385	0.00257863	0.00128931	0.00576199	0.00775436	0.00128931	0.00128931	0.00128931	0.00128931	0.00128931	0.00128931	0.00128931	0.00128931	0.00128931	0.00128931	0.00128931	0.00128931
PC 42:10	0.0142881	0.0128922	0.00969778	0.0274476	0.0189651	0.0157794	0.008718	0.0122337	0.00950331	0.0135452	0.0103371	0.013632	0.004359	0.004359	0.004359	0.004359	0.004359	0.004359	0.004359	0.004359	0.004359	0.004359	0.004359	0.004359
PC 42:4	0.0103358	0.0120016	0.0128808	0.0124038	0.0178431	0.011218	0.00888014	0.010643	0.00870202	0.0124626	0.00435101	0.0127175	0.00435101	0.00435101	0.00435101	0.00435101	0.00435101	0.00435101	0.00435101	0.00435101	0.00435101	0.00435101	0.00435101	0.00435101
PE 10:0_26:2	0.112517	0.116595	0.0949967	0.144853	0.131252	0.105601	0.0897578	0.111396	0.10491	0.0962481	0.0912817	0.108327	0.0448789	0.0448789	0.0448789	0.0448789	0.0448789	0.0448789	0.0448789	0.0448789	0.0448789	0.0448789	0.0448789	0.0448789
PE 16:0_16:1	0.00563546	0.00491858	0.00356269	0.00751686	0.00611157	0.00629881	0.00286228	0.00533427	0.00410634	0.00513463	0.00437019	0.00499621	0.00143114	0.00143114	0.00143114	0.00143114	0.00143114	0.00143114	0.00143114	0.00143114	0.00143114	0.00143114	0.00143114	0.00143114
PE 16:0_18:1	0.0927594	0.087651	0.063798	0.114918	0.105744	0.0745166	0.0598714	0.0836558	0.0782489	0.0751672	0.0700362	0.0835426	0.0299357	0.0299357	0.0299357	0.0299357	0.0299357	0.0299357	0.0299357	0.0299357	0.0299357	0.0299357	0.0299357	0.0299357
PE 16:0_20:3	0.00644444	0.00644444	0.00644444	0.00644444	0.00644444	0.00644444	0.00644444	0.00644444	0.00644444	0.00644444	0.00644444	0.0128889	0.00644444	0.00644444	0.00644444	0.00644444	0.00644444	0.00644444	0.00644444	0.00644444	0.00644444	0.00644444	0.00644444	0.00644444
PE 16:0_22:6	1.17251	0.982372	0.927585	0.49808	0.750412	0.963914	0.960495	1.02288	1.0553	1.05916	0.942318	0.994147	6.40522	7.33734	10.1275	10.6752	8.31971	7.4125	8.06861	8.82789	6.74535	7.14118	8.74398	9.84609
PE 18:0_18:1	0.116179	0.132592	0.101067	0.162792	0.205388	0.104907	0.0649215	0.117013	0.082931	0.0986919	0.103623	0.138546	10.0424	12.3054	13.5913	13.5079	20.744	13.3902	10.7613	10.7715	8.14321	12.8123	10.4564	11.7005
PE 18:0_20:1	0.0143406	0.0141362	0.00998765	0.0331782	0.0265361	0.0136757	0.00755716	0.0119216	0.00980856	0.0143054	0.0118039	0.0220184	0.0119167	0.0152597	0.0187768	0.00844652	0.0178653	0.0147808	0.0118679	0.00945727	0.0111076	0.01031	0.014179	0.0151571
PE 18:0_20:4	0.625499	0.622857	0.511497	0.480929	0.672996	0.710542	0.561841	0.541344	0.633444	0.639311	0.573826	0.674175	0.650453	0.621606	0.703756	0.582209	0.530671	0.525174	0.576877	0.584262	0.497354	0.522771	0.460764	0.652515
PE 18:0_22:4	0.163535	0.149969	0.136102	0.163155	0.213878	0.156497	0.110814	0.137413	0.133021	0.128959	0.14296	0.147881	0.155191	0.126602	0.166403	0.139052	0.16262	0.145679	0.131634	0.131155	0.118414	0.121769	0.120414	0.147043
PE 18:0_22:6	1.26011	1.03201	0.863161	1.07199	1.1506	1.00536	0.759375	1.1067	0.925601	0.971695	1.01083	1.02984	1.11266	0.920788	1.04697	1.00651	0.900233	0.849679	0.977657	0.924162	1.07428	0.811445	1.09328	1.08762
PE 18:1_20:4	0.340576	0.314626	0.289405	0.282887	0.308123	0.306264	0.26411	0.31013	0.31357	0.297058	0.289819	0.314957	0.331266	0.296498	0.3212	0.255887	0.244088	0.229341	0.312196	0.278404	0.302722	0.27526	0.295602	0.321112
PE 18:1_22:6	0.276261	0.241126	0.218118	0.162773	0.196902	0.260117	0.221179	0.229128	0.259956	0.238125	0.232358	0.22504	0.261742	0.229304	0.251313	0.243882	0.146554	0.184545	0.234403	0.238733	0.216549	0.189275	0.206673	0.254496
PE 18:2_20:4	0.036359	0.0384165	0.0256571	0.0480711	0.0397704	0.0314344	0.029195	0.0369404	0.0292748	0.0369559	0.0388977	0.0396942	0.0364999	0.0350934	0.0427363	0.0287987	0.0261941	0.0256984	0.0324075	0.0293087	0.0364783	0.0268179	0.0383145	0.0393722
PE 20:1_22:6	0.0167497	0.0170369	0.0140816	0.0191922	0.0290292	0.026436	0.00966959	0.0221274	0.0149687	0.0183734	0.0207558	0.0234526	0.00483479	0.00483479	0.00483479	0.00483479	0.00483479	0.00483479	0.00483479	0.00483479	0.00483479	0.00483479	0.00483479	0.00483479
PE 20:3_22:6	0.0283023	0.0262851	0.0119262	0.0379934	0.0295752	0.0304258	0.0238525	0.0329239	0.0119262	0.0314652	0.0119262	0.0303007	0.0119262	0.0119262	0.0119262	0.0119262	0.0119262	0.0119262	0.0119262	0.0119262	0.0119262	0.0119262	0.0119262	0.0119262
PE 22:4_22:6	0.0446419	0.0491017	0.0353797	0.0778716	0.0488696	0.0318825	0.0261655	0.046982	0.0327281	0.0369066	0.0380789	0.0436475	13.8702	17.7007	17.1318	16.966	52.5156	24.2583	19.37	19.4716	10.0498	26.9158	17.2017	13.5766
PE 22:6_22:6	0.0149832	0.011462	0.00844382	0.0375183	0.0164141	0.0132706	0.00757619	0.0115088	0.00923621	0.0127463	0.0115487	0.0127778	1.76827	1.68854	1.62638	1.96128	3.73766	1.75689	1.50477	1.59231	1.29952	1.91575	1.87239	1.45388
PE 34:0	0.0136659	0.00699221	0.0083595	0.00801479	0.00890249	0.00771208	0.00497382	0.0089701	0.010094	0.0110135	0.00885833	0.0106559	0.00248691	0.00248691	0.00248691	0.00248691	0.00248691	0.00248691	0.00248691	0.00248691	0.00248691	0.00248691	0.00248691	0.00248691
PE 36:4	0.173593	0.171303	0.134601	0.135171	0.148944	0.13941	0.143519	0.173167	0.165328	0.150749	0.187882	0.159679	0.0673006	0.0673006	0.0673006	0.0673006	0.0673006	0.0673006	0.0673006	0.0673006	0.0673006	0.0673006	0.0673006	0.0673006
PE 39:7	0.0119223	0.0107026	0.0085127	0.0111106	0.0134839	0.0130027	0.00640982	0.0100074	0.00954059	0.0098528	0.0119576	0.0116576	0.00320491	0.00320491	0.00320491	0.00320491	0.00320491	0.00320491	0.00320491	0.00320491	0.00320491	0.00320491	0.00320491	0.00320491
PE 40:8	0.00606136	0.00598632	0.00567522	0.00903616	0.00735198	0.00751189	0.00601631	0.00839952	0.00640651	0.00676536	0.00941243	0.00772718	0.00283761	0.00283761	0.00283761	0.00283761	0.00283761	0.00283761	0.00283761	0.00283761	0.00283761	0.00283761	0.00283761	0.00283761
PG 16:0_20:4	0.0535141	0.0420493	0.0339786	0.0251256	0.0438277	0.0439209	0.0299495	0.0428054	0.0390044	0.0388475	0.0413897	0.0410485	0.0125628	0.0125628	0.0125628	0.0125628	0.0125628	0.0125628	0.0125628	0.0125628	0.0125628	0.0125628	0.0125628	0.0125628
PG 18:1_22:2	0.285659	0.402554	0.337015	0.317306	0.530342	0.202702	0.182598	0.367566	0.208492	0.266907	0.290834	0.375652	0.0912991	0.0912991	0.0912991	0.0912991	0.0912991	0.0912991	0.0912991	0.0912991	0.0912991	0.0912991	0.0912991	0.0912991
PG 20:1_22:5	0.0724959	0.109629	0.10483	0.313736	0.154145	0.0627362	0.382985	0.078685	0.0410734	0.0792329	0.0853864	0.118593	0.0205367	0.0205367	0.0205367	0.0205367	0.0205367	0.0205367	0.0205367	0.0205367	0.0205367	0.0205367	0.0205367	0.0205367
PG 22:1_22:5	0.117683	0.214875	0.0758355	0.527242	0.108234	0.336592	0.702076	0.132331	0.0667532	0.133997	0.124066	0.188195	0.0333766	0.0333766	0.0333766	0.0333766	0.0333766	0.0333766	0.0333766	0.0333766	0.0333766	0.0333766	0.0333766	0.0333766
PS 16:0_18:1	0.0299126	0.0254767	0.0221413	0.0248704	0.0358062	0.0296949	0.0161042	0.0245059	0.0208582	0.0255371	0.0289261	0.0272427	0.00805209	0.00805209	0.00805209	0.00805209	0.00805209	0.00805209	0.00805209	0.00805209	0.00805209	0.00805209	0.00805209	0.00805209
PS 18:0_18:1	0.103846	0.127378	0.0928417	0.194639	0.206745	0.103535	0.0548734	0.104516	0.0758025	0.0907973	0.0942546	0.125665	0.135615	0.128662	0.168867	0.165954	0.177246	0.161285	0.175916	0.199516	0.118369	0.185734	0.178592	0.151907
PS 18:0_22:4	0.045425	0.0452618	0.0377893	0.0387684	0.0598168	0.0440525	0.0321842	0.0410534	0.0392899	0.0490737	0.047613	0.0501729	0.0460686	0.0448859	0.0532864	0.0409758	0.0454195	0.0441909	0.043049	0.0439963	0.0347038	0.0459515	0.0397031	0.0522946
PS 18:0_22:6	0.517563	0.433702	0.364882	0.308535	0.423989	0.429411	0.351685	0.461099	0.447414	0.427206	0.423156	0.435277	0.461472	0.391359	0.453396	0.433501	0.291996	0.334698	0.427443	0.396143	0.429319	0.337478	0.433754	0.459388
PS 18:1_18:1	0.0687532	0.0682463	0.0561621	0.115848	0.0782435	0.0719026	0.0454821	0.0663961	0.0652209	0.0665334	0.065279	0.062111	0.0717261	0.0655325	0.0813771	0.0491895	0.0634511	0.0515593	0.0669492	0.0499208	0.0664951	0.055938	0.0679098	0.0807199
PS 18:1_20:1	0.0658577	0.0446912	0.0420752	0.0590792	0.0685057	0.0519486	0.0358001	0.0522428	0.0448368	0.0553896	0.0521539	0.0581546	0.0179001	0.0179001	0.0179001	0.0179001	0.0179001	0.0179001	0.0179001	0.0179001	0.0179001	0.0179001	0.0179001	0.0179001
PS 18:1_20:4	0.0616058	0.0655805	0.0483043	0.088647	0.0846143	0.0604674	0.0385153	0.0555656	0.0490585	0.057583	0.0556074	0.0656776	0.0576391	0.0608894	0.0699076	0.0445381	0.0637839	0.0561279	0.0594347	0.047241	0.0555068	0.0476249	0.0526397	0.0619669
PS 18:1_22:6	0.0141372	0.0128261	0.0119211	0.0135769	0.0139577	0.0130973	0.00771576	0.0118709	0.0120723	0.012023	0.0139246	0.01421	8.96633	9.00253	7.95909	10.5541	10.4422	8.38092	8.58926	6.95275	6.53176	8.0509	8.53285	7.05509
PS 22:4_22:6	0.0206349	0.0212547	0.0170171	0.018861	0.0209985	0.019874	0.0121266	0.0172846	0.0139213	0.017611	0.0167785	0.0190549	0.02499	0.0200541	0.0250946	0.0140709	0.0156431	0.0157371	0.019026	0.0146181	0.0194956	0.0150451	0.019989	0.0194088
PS 22:6_22:6	0.0111076	0.0117632	0.00733368	0.0296355	0.014556	0.00940435	0.00614593	0.00946161	0.00852289	0.0116825	0.0100907	0.0105925	0.0111353	0.0121572	0.0129202	0.00778248	0.0132811	0.00852761	0.0118977	0.00730462	0.00980686	0.00901543	0.00944085	0.0149506
PS 24:4_22:6	0.0100003	0.00730731	0.00611526	0.0102146	0.010152	0.00649645	0.00609926	0.00655309	0.00593057	0.0076265	0.00721823	0.00812159	0.00772149	0.00743101	0.00831061	0.00497302	0.00673282	0.00627333	0.00740999	0.00480841	0.00567815	0.00658069	0.0065421	0.00706505
PS 39:6	0.337533	0.267572	0.258538	0.14297	0.329916	0.272156	0.20212	0.233714	0.228008	0.300239	0.237844	0.258075	0.0714849	0.0714849	0.0714849	0.0714849	0.0714849	0.0714849	0.0714849	0.0714849	0.0714849	0.0714849	0.0714849	0.0714849
PS 40:1	0.00779996	0.0117287	0.00809857	0.0134902	0.0125536	0.00824323	0.0041461	0.00889173	0.00590582	0.007201	0.00867629	0.0102812	0.00207305	0.00207305	0.00207305	0.00207305	0.00207305	0.00207305	0.00207305	0.00207305	0.00207305	0.00207305	0.00207305	0.00207305
PS 40:2	0.00799582	0.0130762	0.00758387	0.0172586	0.0194048	0.00901504	0.00690154	0.00974708	0.0076683	0.00765906	0.00898465	0.0125138	0.00345077	0.00345077	0.00345077	0.00345077	0.00345077	0.00345077	0.00345077	0.00345077	0.00345077	0.00345077	0.00345077	0.00345077
PS 40:7	0.0302555	0.0256236	0.0216955	0.0325241	0.0386622	0.031112	0.0154481	0.0255641	0.0174903	0.019046	0.0225488	0.0258002	0.01212	0.0113618	0.01572	0.0120375	0.0087201	0.00708838	0.0106287	0.00955254	0.0113377	0.00996061	0.009194	0.0136991
PS 42:2	0.00807709	0.00837215	0.00745574	0.0160903	0.0128245	0.00745567	0.00532353	0.0102229	0.00709624	0.00837475	0.00870069	0.0115709	0.00266176	0.00266176	0.00266176	0.00266176	0.00266176	0.00266176	0.00266176	0.00266176	0.00266176	0.00266176	0.00266176	0.00266176
PS 42:5	0.607271	0.41138	0.414787	0.240577	0.417694	0.306999	0.274238	0.391644	0.211855	0.105927	0.501153	0.397144	0.105927	0.105927	0.105927	0.105927	0.105927	0.105927	0.105927	0.105927	0.105927	0.105927	0.105927	0.105927
PS 42:7	0.0101624	0.00849749	0.00638473	0.0127627	0.0118657	0.0109267	0.00519988	0.00869653	0.0075649	0.00767933	0.00779163	0.0110212	0.00259994	0.00259994	0.00259994	0.00259994	0.00259994	0.00259994	0.00259994	0.00259994	0.00259994	0.00259994	0.00259994	0.00259994
SHexCer d18:1_24:1	4041.77	7019.82	6242.4	8541.99	8563.86	4008.99	3929.76	5841.6	3686.92	4509.98	5793.54	6064.31	3530.69	6931.35	5263.05	7882.62	10297.2	8318.92	5727.46	8740.05	5108.17	8130.24	5809.35	5061.07
SHexCer d34:1	0.362188	0.415197	0.367547	0.199948	0.3005	0.344175	0.395057	0.364629	0.325268	0.380887	0.360964	0.384867	0.438144	0.479007	0.394212	0.36212	0.349537	0.377104	0.422606	0.344985	0.344745	0.507322	0.442695	0.301286
SHexCer d36:0	0.106898	0.115858	0.109678	0.179514	0.153796	0.085244	0.119791	0.0629454	0.0694734	0.0996421	0.0576883	0.0896685	0.126589	0.160201	0.0728943	0.0539118	0.149161	0.0776747	0.075365	0.103526	0.079389	0.103662	0.0796258	0.107479
SHexCer d36:1	9.23901	9.34606	8.94376	6.71331	8.41315	9.07356	8.59539	9.07838	8.75939	9.17683	8.27167	8.97367	8.89932	9.5033	8.81399	8.51139	7.99007	8.19075	8.88596	8.74062	8.55571	9.50311	9.32255	8.20222
SHexCer d36:2	0.250741	0.299766	0.297846	0.181337	0.272389	0.256633	0.26615	0.266628	0.270713	0.252967	0.249866	0.287067	0.295947	0.328773	0.281293	0.280913	0.371342	0.320261	0.313325	0.30928	0.343735	0.373729	0.404548	0.300245
SHexCer d40:1	0.849199	1.43211	1.24012	1.43185	1.64443	0.825456	0.637614	1.11038	0.621224	0.90512	0.960824	1.32773	0.914148	1.50408	1.18567	0.981535	1.86477	1.49132	1.33483	1.21279	1.14654	1.70405	1.43588	1.02852
SHexCer d41:1	0.533416	0.803126	0.887952	0.757938	0.702451	0.569978	0.567843	0.594681	0.453933	0.615387	0.777297	0.746758	0.226966	0.226966	0.226966	0.226966	0.226966	0.226966	0.226966	0.226966	0.226966	0.226966	0.226966	0.226966
SHexCer d41:2	0.613364	1.03691	0.759152	0.840839	1.1432	0.645828	0.477692	0.726842	0.438662	0.677057	0.674939	0.863487	0.658899	1.06252	0.862777	0.658233	1.09289	1.02049	0.837204	0.849068	0.639478	1.08407	0.851918	0.639998
SHexCer d42:1	1.34089	1.87683	2.46767	2.14296	1.99718	1.22384	1.13151	1.95854	1.1783	1.54033	1.7569	2.37797	1.53363	2.42588	1.82052	1.8587	2.91486	1.92235	2.25844	2.0215	2.12691	2.25224	2.24041	1.57724
SHexCer d42:2	5.48461	9.88573	8.56555	9.89641	11.0958	5.62298	4.34627	7.46214	4.04255	6.2155	6.49293	9.10896	5.97533	9.86754	7.81697	6.41584	11.5929	9.72402	9.01866	8.08965	7.474	11.4246	9.71558	6.72487
SHexCer d42:3	927.094	1164.71	1307.03	983.375	1559.19	906.875	673.279	1109.25	969.84	1127.59	1317.27	1269.38	0.275203	0.384655	0.35954	0.276491	0.50599	0.398082	0.372469	0.378216	0.34543	0.490009	0.447199	0.337337
SHexCer d43:2	0.501776	0.821816	0.710668	0.786422	0.776601	0.564825	0.469529	0.614283	0.429638	0.574051	0.611095	0.711854	0.542481	0.76751	0.579441	0.50828	1.00578	0.804938	0.762532	0.68431	0.61025	1.00543	0.786016	0.539151
SM d18:1_18:0	1.05426	0.734488	0.944215	0.649332	0.805527	1.20006	0.920989	1.00155	1.12718	1.16544	1.01306	0.86127	1.06709	1.08575	1.08466	0.997817	0.563793	0.711387	0.885015	0.975758	0.86501	0.942738	0.867013	0.879567
SM d34:0	0.00328822	0.00268572	0.00366835	0.00477819	0.00425117	0.00428752	0.00324441	0.00395449	0.00370436	0.00414396	0.00446199	0.00364208	0.00134286	0.00134286	0.00134286	0.00134286	0.00134286	0.00134286	0.00134286	0.00134286	0.00134286	0.00134286	0.00134286	0.00134286
SM d34:1	0.0414939	0.0351679	0.0440145	0.052352	0.0440991	0.0424203	0.0353669	0.0406741	0.0407974	0.0443602	0.0425638	0.0368351	0.0399783	0.0478865	0.048143	0.0419569	0.0335024	0.0396111	0.0390282	0.0419626	0.0343252	0.0466004	0.0371158	0.0322521
SM d36:0	0.0072574	0.00571965	0.00762183	0.00715479	0.0117457	0.0114931	0.0100626	0.00805343	0.0101536	0.00779766	0.00962113	0.00676039	0.00285983	0.00285983	0.00285983	0.00285983	0.00285983	0.00285983	0.00285983	0.00285983	0.00285983	0.00285983	0.00285983	0.00285983
SM d36:2	0.136471	0.117296	0.117775	0.0489109	0.0999667	0.145367	0.149718	0.144161	0.169651	0.159393	0.112602	0.103642	0.0244555	0.0244555	0.0244555	0.0244555	0.0244555	0.0244555	0.0244555	0.0244555	0.0244555	0.0244555	0.0244555	0.0244555
SM d38:1	0.179011	0.123958	0.160739	0.159191	0.146959	0.172353	0.150553	0.173077	0.18536	0.186241	0.173902	0.146753	0.176575	0.174501	0.16368	0.202637	0.130647	0.140949	0.151402	0.185883	0.154317	0.169543	0.165285	0.138332
SM d40:1	0.0318989	0.0661192	0.0508061	0.103648	0.0707518	0.0252703	0.0190913	0.0427763	0.0228428	0.0434125	0.034473	0.00866437	0.0173287	0.0361365	0.018098	0.0433964	0.03931	0.0338387	0.0294137	0.0364331	0.0332322	0.0692857	0.0617782	0.0299032
SM d42:2	0.0350559	0.0392363	0.0388159	0.0783702	0.0638594	0.0304344	0.0200056	0.0377727	0.0252223	0.0328518	0.0363686	0.0356718	0.0264156	0.0416715	0.0391895	0.0304201	0.0907516	0.0464112	0.0359402	0.0357808	0.029549	0.0561093	0.0373086	0.0303127
SQDG 18:0_20:4	2.98342	1.86154	1.29024	2.7145	1.60612	1.43675	1.03994	2.45436	1.10233	1.88616	1.58236	1.40905	0.519969	0.519969	0.519969	0.519969	0.519969	0.519969	0.519969	0.519969	0.519969	0.519969	0.519969	0.519969
SQDG 18:0_22:6	0.569916	0.414365	0.251659	0.761424	0.362051	0.231422	0.182194	0.457415	0.196145	0.296444	0.291343	0.262677	0.091097	0.347552	0.292068	0.41315	0.091097	0.304257	0.318077	0.244198	0.091097	0.091097	0.850436	0.377153
SQDG 38:5	1.56504	1.12266	0.787535	2.80204	1.0131	0.59619	0.240061	1.45933	0.480122	0.98231	0.804439	0.841017	0.240061	0.240061	0.240061	0.240061	0.240061	0.240061	0.240061	0.240061	0.240061	0.240061	0.240061	0.240061
TG 14:0_16:0_16:0	0.00411362	0.00297757	0.00292548	0.00331861	0.00278867	0.00322809	0.00214157	0.00330789	0.00325524	0.00355303	0.00290531	0.00280734	0.00107078	0.00107078	0.00107078	0.00107078	0.00107078	0.00107078	0.00107078	0.00107078	0.00107078	0.00107078	0.00107078	0.00107078
TG 14:0_16:0_18:2	0.0023452	0.00438026	0.00553794	0.00327672	0.00169048	0.00402071	0.00204412	0.00435054	0.00571017	0.00492556	0.00440022	0.00267154	0.000845238	0.000845238	0.000845238	0.000845238	0.000845238	0.000845238	0.000845238	0.000845238	0.000845238	0.000845238	0.000845238	0.000845238
TG 16:0_16:0_16:0	0.0175113	0.00896991	0.0120447	0.00800673	0.00958218	0.0155334	0.00958807	0.0122477	0.0140066	0.0144737	0.0124375	0.0102487	0.013326	0.0107626	0.0104624	0.01214	0.00766892	0.0114647	0.0105725	0.0103701	0.0110161	0.0124984	0.0101141	0.013887
TG 16:0_16:0_16:1	0.00477469	0.00540842	0.00692831	0.00590346	0.00537086	0.0068816	0.00445822	0.00717327	0.00691714	0.00820063	0.00540012	0.00497626	0.00222911	0.00222911	0.00222911	0.00222911	0.00222911	0.00222911	0.00222911	0.00222911	0.00222911	0.00222911	0.00222911	0.00222911
TG 16:0_16:0_18:1	0.0227969	0.0313303	0.0377298	0.0286359	0.0216905	0.0347393	0.0235958	0.0318356	0.0507902	0.0387358	0.0326474	0.0277566	0.021137	0.0330309	0.0206679	0.0280685	0.0183348	0.0345864	0.018066	0.0387405	0.0320093	0.0417152	0.0265149	0.0287619
TG 16:0_16:1_18:1	0.00862726	0.0170426	0.0154268	0.0117337	0.00763624	0.0116546	0.00878268	0.0149931	0.0234519	0.0190356	0.0175771	0.00956234	0.00381812	0.00381812	0.00381812	0.00381812	0.00381812	0.00381812	0.00381812	0.00381812	0.00381812	0.00381812	0.00381812	0.00381812
TG 16:0_18:0_18:1	0.0216496	0.0186639	0.0198665	0.0214536	0.0154663	0.0222544	0.0186126	0.0217095	0.0248181	0.0248962	0.0181531	0.0200984	0.00773316	0.00773316	0.00773316	0.00773316	0.00773316	0.00773316	0.00773316	0.00773316	0.00773316	0.00773316	0.00773316	0.00773316
TG 16:0_18:1_18:1	0.0240547	0.0556132	0.0674333	0.0398778	0.0300309	0.0398713	0.0269628	0.0440468	0.128661	0.0787432	0.0694151	0.0326401	0.0202395	0.049444	0.0263733	0.0306399	0.0246799	0.0468901	0.0174268	0.0647274	0.0657928	0.0975226	0.0395771	0.0371729
TG 16:0_18:1_18:2	0.0105578	0.0241194	0.0251877	0.0138327	0.0082043	0.0163286	0.00999885	0.0170879	0.0648322	0.040416	0.0379828	0.0138365	0.00410215	0.00410215	0.00410215	0.00410215	0.00410215	0.00410215	0.00410215	0.00410215	0.00410215	0.00410215	0.00410215	0.00410215
TG 16:1_18:1_18:2	0.00646802	0.0100862	0.0131043	0.00685636	0.00478358	0.010162	0.00639698	0.0110996	0.0287712	0.0238148	0.017676	0.00758999	0.00239179	0.00239179	0.00239179	0.00239179	0.00239179	0.00239179	0.00239179	0.00239179	0.00239179	0.00239179	0.00239179	0.00239179
TG 18:1_18:1_18:1	0.017618	0.0436191	0.0619038	0.029311	0.016866	0.0298719	0.0190523	0.0348433	0.137047	0.0867599	0.0755661	0.0254996	0.012855	0.0357716	0.0201352	0.0183075	0.0154913	0.0338973	0.0106143	0.0501096	0.0647925	0.11473	0.031658	0.0250271
TG 18:1_18:1_18:2	0.010422	0.0223272	0.0298221	0.00938108	0.00649829	0.0144597	0.00911874	0.0173683	0.0756696	0.0552903	0.0493988	0.0125335	0.0117476	0.0113673	0.0108631	0.01141	0.00758315	0.0116443	0.00833842	0.0147223	0.0171214	0.0183528	0.0126101	0.0133507
TG 18:2_18:2_18:2	0.0032457	0.00412657	0.00518387	0.0034326	0.00288216	0.00333128	0.00259471	0.00396634	0.00942495	0.00881607	0.0082327	0.00406869	0.00319774	0.00306363	0.00266572	0.00204018	0.00203809	0.00289766	0.00171136	0.00268272	0.0059749	0.0107519	0.0050089	0.0040474
TG 50:3	0.00480726	0.00896567	0.00985092	0.00533753	0.00316184	0.00657025	0.00448112	0.00742658	0.0134022	0.0118909	0.00922459	0.00526977	0.00225504	0.00686976	0.00368323	0.00304494	0.00313488	0.00562761	0.00232108	0.00817991	0.00713539	0.0123755	0.00471023	0.00481157
TG 53:3	0.00104794	0.00222546	0.00209587	0.00104794	0.00104794	0.00104794	0.00104794	0.00104794	0.00407394	0.00104794	0.00104794	0.00104794	0.00104794	0.00104794	0.00104794	0.00104794	0.00104794	0.00104794	0.00104794	0.00104794	0.00104794	0.00104794	0.00104794	0.00104794
TG 54:5	0.00566922	0.0106378	0.0152645	0.00793178	0.00595104	0.00760806	0.00442637	0.0096322	0.0299947	0.0296649	0.023459	0.00986617	0.00221319	0.00221319	0.00221319	0.00221319	0.00221319	0.00221319	0.00221319	0.00221319	0.00221319	0.00221319	0.00221319	0.00221319
TG 54:6	0.00843483	0.00870516	0.0102763	0.0103268	0.00726623	0.00865205	0.00703055	0.00833066	0.00818258	0.0106499	0.00850715	0.0075772	0.00351527	0.00351527	0.00351527	0.00351527	0.00351527	0.00351527	0.00351527	0.00351527	0.00351527	0.00351527	0.00351527	0.00351527
TG 56:7	0.00798633	0.00906037	0.010361	0.0133642	0.00788643	0.0093988	0.007149	0.00941227	0.0143537	0.0142719	0.0116836	0.00808449	0.0035745	0.0035745	0.0035745	0.0035745	0.0035745	0.0035745	0.0035745	0.0035745	0.0035745	0.0035745	0.0035745	0.0035745
TG 58:10	0.00324222	0.00397817	0.00348384	0.00333542	0.00223931	0.00321339	0.00277892	0.00431689	0.00337356	0.00481902	0.00283352	0.00326494	0.00111965	0.00111965	0.00111965	0.00111965	0.00111965	0.00111965	0.00111965	0.00111965	0.00111965	0.00111965	0.00111965	0.00111965
TG 60:10	0.00397166	0.00330121	0.00439003	0.00539509	0.0034805	0.00476687	0.0035003	0.00361817	0.00368473	0.00502644	0.00398336	0.00413512	0.00165061	0.00165061	0.00165061	0.00165061	0.00165061	0.00165061	0.00165061	0.00165061	0.00165061	0.00165061	0.00165061	0.00165061
ACar 12:0	118.091	118.091	118.091	118.091	118.091	118.091	118.091	118.091	118.091	118.091	118.091	118.091	288.473	423.206	392.181	376.42	442.889	499.548	385.542	385.57	236.181	485.133	394.535	249.136
ACar 14:1	74.2611	74.2611	74.2611	74.2611	74.2611	74.2611	74.2611	74.2611	74.2611	74.2611	74.2611	74.2611	148.522	264.922	180.231	254.274	224.699	310.437	182.38	250.769	166.246	426.77	327.129	165.756
BMP 20:4_22:6	0.00124874	0.00124874	0.00124874	0.00124874	0.00124874	0.00124874	0.00124874	0.00124874	0.00124874	0.00124874	0.00124874	0.00124874	0.00443693	0.00414847	0.00431533	0.00313884	0.00249748	0.00300272	0.00353266	0.00304254	0.00336565	0.0029633	0.00365247	0.00452518
BMP 22:6_22:6	0.00348316	0.00348316	0.00348316	0.00348316	0.00348316	0.00348316	0.00348316	0.00348316	0.00348316	0.00348316	0.00348316	0.00348316	0.0126052	0.00883163	0.0123666	0.00697758	0.00813465	0.00818779	0.00767505	0.00696633	0.00902401	0.00703559	0.00939864	0.00992435
Cer_ADS d25:0_15:0	0.00995532	0.00995532	0.00995532	0.00995532	0.00995532	0.00995532	0.00995532	0.00995532	0.00995532	0.00995532	0.00995532	0.00995532	0.0297177	0.0292663	0.0199106	0.0234997	0.0275032	0.0239575	0.0272413	0.0226683	0.0299455	0.0282578	0.0258195	0.0203395
Cer_ADS d26:0_16:1	0.0022087	0.0022087	0.0022087	0.0022087	0.0022087	0.0022087	0.0022087	0.0022087	0.0022087	0.0022087	0.0022087	0.0022087	0.00476471	0.00676083	0.0104929	0.00599965	0.0103057	0.00763463	0.0102549	0.00546095	0.00441741	0.00953481	0.00475437	0.00541552
Cer_NDS d16:0_25:1	0.0104995	0.0104995	0.0104995	0.0104995	0.0104995	0.0104995	0.0104995	0.0104995	0.0104995	0.0104995	0.0104995	0.0104995	0.0270212	0.0257259	0.0209989	0.024805	0.0256282	0.029286	0.0303843	0.0313746	0.0244444	0.0304236	0.0255881	0.0214884
Cer_NDS d16:0_26:2	0.101907	0.101907	0.101907	0.101907	0.101907	0.101907	0.101907	0.101907	0.101907	0.101907	0.101907	0.101907	0.236302	0.266166	0.203815	0.216941	0.351093	0.290597	0.279366	0.276953	0.24406	0.396517	0.323111	0.205542
Cer_NDS d40:1	0.0365338	0.0365338	0.0365338	0.0365338	0.0365338	0.0365338	0.0365338	0.0365338	0.0365338	0.0365338	0.0365338	0.0365338	0.106514	0.0992244	0.0895539	0.0993319	0.0937507	0.106985	0.104258	0.117708	0.0959127	0.117734	0.0993919	0.0730675
Cer_NDS d41:2	0.0100461	0.0100461	0.0100461	0.0100461	0.0100461	0.0100461	0.0100461	0.0100461	0.0100461	0.0100461	0.0100461	0.0100461	0.0263611	0.0218638	0.0211113	0.0222492	0.0326552	0.0296266	0.0269434	0.0316876	0.02733	0.0373797	0.0236999	0.0200921
Cer_NS d18:1_20:0	0.0855354	0.0855354	0.0855354	0.0855354	0.0855354	0.0855354	0.0855354	0.0855354	0.0855354	0.0855354	0.0855354	0.0855354	0.275758	0.221163	0.186294	0.274188	0.171071	0.205294	0.227709	0.220491	0.304445	0.221454	0.274994	0.199485
Cer_NS d18:2_20:0	0.00148252	0.00148252	0.00148252	0.00148252	0.00148252	0.00148252	0.00148252	0.00148252	0.00148252	0.00148252	0.00148252	0.00148252	0.0044627	0.00423273	0.00649433	0.00296504	0.00323986	0.0030035	0.00399856	0.00351447	0.00355313	0.00389266	0.00516672	0.00470117
Cer_NS d20:1_18:0	0.00172672	0.00172672	0.00172672	0.00172672	0.00172672	0.00172672	0.00172672	0.00172672	0.00172672	0.00172672	0.00172672	0.00172672	0.00489301	0.00428172	0.0044442	0.00451832	0.00355307	0.00345344	0.00362011	0.00381633	0.00480345	0.00390118	0.00417779	0.00450812
CL 72:10	0.0214874	0.0214874	0.0214874	0.0214874	0.0214874	0.0214874	0.0214874	0.0214874	0.0214874	0.0214874	0.0214874	0.0214874	0.0506517	0.0528582	0.0481273	0.0558492	0.0499064	0.0451128	0.0559824	0.0458534	0.0594416	0.0429749	0.0495171	0.0452194
DG 18:0_20:4	0.017622	0.017622	0.017622	0.017622	0.017622	0.017622	0.017622	0.017622	0.017622	0.017622	0.017622	0.017622	0.0968805	0.068077	0.0656031	0.0936952	0.064968	0.125587	0.0680132	0.0977297	0.0698467	0.0407339	0.0716095	0.035244
DG 18:0_22:6	0.00217812	0.00217812	0.00217812	0.00217812	0.00217812	0.00217812	0.00217812	0.00217812	0.00217812	0.00217812	0.00217812	0.00217812	0.0102929	0.00653851	0.00654274	0.00888854	0.0062046	0.0125146	0.00621214	0.00830247	0.0102069	0.00525863	0.0092357	0.00435624
DG 18:1_18:1	0.00172723	0.00172723	0.00172723	0.00172723	0.00172723	0.00172723	0.00172723	0.00172723	0.00172723	0.00172723	0.00172723	0.00172723	0.00593996	0.00543887	0.00476885	0.00495916	0.00489594	0.00719526	0.00387239	0.00465977	0.00677942	0.00434279	0.00434855	0.00345446
EtherPE 16:1e_18:1	3.33089	3.33089	3.33089	3.33089	3.33089	3.33089	3.33089	3.33089	3.33089	3.33089	3.33089	3.33089	6.96659	8.3792	9.90671	10.3232	12.2114	9.51396	9.57296	8.36522	6.66178	8.44105	8.42032	8.77402
EtherPE 18:1e_20:3	0.910637	0.910637	0.910637	0.910637	0.910637	0.910637	0.910637	0.910637	0.910637	0.910637	0.910637	0.910637	2.25159	2.40826	2.86202	2.9364	3.29656	2.8513	2.4106	2.39745	1.82127	2.45151	2.06417	2.46213
EtherPE 18:1e_22:1	0.266783	0.266783	0.266783	0.266783	0.266783	0.266783	0.266783	0.266783	0.266783	0.266783	0.266783	0.266783	0.537961	0.731041	0.788159	0.902387	1.7386	0.890015	0.690347	0.572554	0.533567	0.797211	0.705718	0.67519
EtherPE 18:1e_22:4	6.51078	6.51078	6.51078	6.51078	6.51078	6.51078	6.51078	6.51078	6.51078	6.51078	6.51078	6.51078	17.023	17.6604	21.1196	22.1056	24.0131	19.9481	17.5801	17.6958	13.0216	18.491	15.2006	17.2772
EtherPE 18:2e_20:1	4.10968	4.10968	4.10968	4.10968	4.10968	4.10968	4.10968	4.10968	4.10968	4.10968	4.10968	4.10968	8.21937	12.5943	12.4461	13.1785	28.8443	15.8214	12.2708	10.8915	8.57398	13.3103	12.3586	10.4458
EtherPE 18:2e_24:1	0.0913086	0.0913086	0.0913086	0.0913086	0.0913086	0.0913086	0.0913086	0.0913086	0.0913086	0.0913086	0.0913086	0.0913086	0.227183	0.267169	0.310247	0.335783	0.847182	0.389733	0.286666	0.274887	0.182617	0.347006	0.293265	0.271491
FA 16:0	0.0544471	0.0544471	0.0544471	0.0544471	0.0544471	0.0544471	0.0544471	0.0544471	0.0544471	0.0544471	0.0544471	0.0544471	0.161313	0.162837	0.128591	0.171618	0.122815	0.155376	0.124534	0.136302	0.12827	0.123993	0.108894	0.1174
FA 18:0	0.0921802	0.0921802	0.0921802	0.0921802	0.0921802	0.0921802	0.0921802	0.0921802	0.0921802	0.0921802	0.0921802	0.0921802	0.309394	0.314336	0.237978	0.335024	0.18436	0.255598	0.229066	0.231463	0.347656	0.222347	0.207037	0.194762
FA 18:1	0.0534306	0.0534306	0.0534306	0.0534306	0.0534306	0.0534306	0.0534306	0.0534306	0.0534306	0.0534306	0.0534306	0.0534306	0.179486	0.237471	0.127342	0.158575	0.106861	0.148194	0.12242	0.139073	0.117853	0.155059	0.125384	0.123865
FA 18:2	0.00507922	0.00507922	0.00507922	0.00507922	0.00507922	0.00507922	0.00507922	0.00507922	0.00507922	0.00507922	0.00507922	0.00507922	0.0161192	0.0472185	0.0113368	0.0152308	0.0101584	0.0204923	0.0104351	0.0233317	0.0156002	0.0217904	0.0217614	0.0234922
FA 22:4	0.00864548	0.00864548	0.00864548	0.00864548	0.00864548	0.00864548	0.00864548	0.00864548	0.00864548	0.00864548	0.00864548	0.00864548	0.0401101	0.0402431	0.0231288	0.03295	0.0207786	0.036437	0.028778	0.0334679	0.022311	0.0289905	0.0242215	0.017291
FAHFA 18:1_18:0	0.00636275	0.00636275	0.00636275	0.00636275	0.00636275	0.00636275	0.00636275	0.00636275	0.00636275	0.00636275	0.00636275	0.00636275	0.0187181	0.0283633	0.014313	0.0151923	0.0131855	0.0177663	0.0152013	0.0160182	0.0127255	0.0186752	0.0139296	0.0132402
HBMP 56:6	0.00334347	0.00334347	0.00334347	0.00334347	0.00334347	0.00334347	0.00334347	0.00334347	0.00334347	0.00334347	0.00334347	0.00334347	0.00668694	0.0095476	0.00817652	0.00774526	0.0179845	0.0103153	0.0111108	0.0089522	0.00714266	0.011034	0.0106328	0.00747029
HexCer_NDS d42:1	0.501585	0.501585	0.501585	0.501585	0.501585	0.501585	0.501585	0.501585	0.501585	0.501585	0.501585	0.501585	1.00317	1.38281	1.2024	1.15049	2.35127	1.42413	1.48646	1.37529	1.46065	1.55157	1.59705	1.16554
HexCer_NDS d43:2	0.0825096	0.0825096	0.0825096	0.0825096	0.0825096	0.0825096	0.0825096	0.0825096	0.0825096	0.0825096	0.0825096	0.0825096	0.165019	0.239732	0.193729	0.167165	0.380063	0.297398	0.250956	0.231879	0.210241	0.353532	0.251461	0.185613
HexCer_NS d18:2_24:1	0.00978511	0.00978511	0.00978511	0.00978511	0.00978511	0.00978511	0.00978511	0.00978511	0.00978511	0.00978511	0.00978511	0.00978511	0.0195702	0.0300566	0.0294476	0.0237437	0.0473011	0.0287778	0.0262055	0.0291598	0.020262	0.0390983	0.0267188	0.0250342
HexCer_NS d38:2	0.00463307	0.00463307	0.00463307	0.00463307	0.00463307	0.00463307	0.00463307	0.00463307	0.00463307	0.00463307	0.00463307	0.00463307	0.0122218	0.0182493	0.0160729	0.00463307	0.0122814	0.0162981	0.0135965	0.00926613	0.0143589	0.0184417	0.00463307	0.0140518
HexCer_NS d43:2	0.0789285	0.0789285	0.0789285	0.0789285	0.0789285	0.0789285	0.0789285	0.0789285	0.0789285	0.0789285	0.0789285	0.0789285	0.163867	0.238895	0.193718	0.157857	0.380493	0.297315	0.250893	0.229004	0.210373	0.353491	0.251358	0.185817
LPC 0:0/20:4	0.00183711	0.00183711	0.00183711	0.00183711	0.00183711	0.00183711	0.00183711	0.00183711	0.00183711	0.00183711	0.00183711	0.00183711	0.00570199	0.00644786	0.00634423	0.00625848	0.00476366	0.00494313	0.00559895	0.00470098	0.00369766	0.00707459	0.00528195	0.00367422
LPE 16:0	0.135195	0.135195	0.135195	0.135195	0.135195	0.135195	0.135195	0.135195	0.135195	0.135195	0.135195	0.135195	0.356863	0.370367	0.298015	0.37918	0.338994	0.306625	0.367695	0.308372	0.307319	0.362639	0.281923	0.27039
LPE 18:0	1.21376	1.21376	1.21376	1.21376	1.21376	1.21376	1.21376	1.21376	1.21376	1.21376	1.21376	1.21376	3.47701	3.49432	2.69646	3.74053	2.54023	2.94107	2.89953	2.90078	2.54011	3.0732	2.44811	2.42753
LPE 18:1	0.0914599	0.0914599	0.0914599	0.0914599	0.0914599	0.0914599	0.0914599	0.0914599	0.0914599	0.0914599	0.0914599	0.0914599	0.203869	0.277441	0.18292	0.231871	0.391408	0.258232	0.228854	0.200875	0.203337	0.232978	0.190401	0.20077
LPE 18:1_2	0.0585285	0.0585285	0.0585285	0.0585285	0.0585285	0.0585285	0.0585285	0.0585285	0.0585285	0.0585285	0.0585285	0.0585285	0.200397	0.212924	0.160434	0.208197	0.191782	0.168631	0.15715	0.137601	0.145281	0.143505	0.117057	0.163775
LPE 20:4	0.182259	0.182259	0.182259	0.182259	0.182259	0.182259	0.182259	0.182259	0.182259	0.182259	0.182259	0.182259	0.536874	0.641224	0.500564	0.554623	0.505785	0.526802	0.540241	0.60672	0.435653	0.520245	0.364518	0.410676
LPE 22:4	0.0108873	0.0108873	0.0108873	0.0108873	0.0108873	0.0108873	0.0108873	0.0108873	0.0108873	0.0108873	0.0108873	0.0108873	0.0217745	0.0639259	0.0469725	0.0459737	0.0397718	0.0373445	0.0286337	0.06965	0.0274368	0.0338195	0.0272845	0.0554357
LPE 22:4_2	0.0331449	0.0331449	0.0331449	0.0331449	0.0331449	0.0331449	0.0331449	0.0331449	0.0331449	0.0331449	0.0331449	0.0331449	0.0858069	0.121072	0.0899943	0.104801	0.134717	0.109054	0.114427	0.092904	0.0816806	0.109647	0.0662898	0.0912598
LPE 22:5	0.0182837	0.0182837	0.0182837	0.0182837	0.0182837	0.0182837	0.0182837	0.0182837	0.0182837	0.0182837	0.0182837	0.0182837	0.0473999	0.0569225	0.0469011	0.0621906	0.068785	0.0578105	0.0514455	0.0462709	0.0365673	0.0490807	0.0452775	0.0416049
LPE 22:6	0.238246	0.238246	0.238246	0.238246	0.238246	0.238246	0.238246	0.238246	0.238246	0.238246	0.238246	0.238246	0.578926	0.688408	0.477653	0.711326	0.709375	0.476492	0.64586	0.64671	0.554082	0.590209	0.487324	0.547838
LPI 18:0	0.0375835	0.0375835	0.0375835	0.0375835	0.0375835	0.0375835	0.0375835	0.0375835	0.0375835	0.0375835	0.0375835	0.0375835	0.0375835	0.0856453	0.0856361	0.137764	0.0375835	0.0865364	0.101382	0.075167	0.0375835	0.0375835	0.205306	0.0949665
LPS 18:0	0.0624675	0.0624675	0.0624675	0.0624675	0.0624675	0.0624675	0.0624675	0.0624675	0.0624675	0.0624675	0.0624675	0.0624675	0.19195	0.227669	0.155588	0.219865	0.201827	0.174043	0.171131	0.147081	0.158347	0.156042	0.124935	0.171863
PA 16:0_16:1	0.00576501	0.00576501	0.00576501	0.00576501	0.00576501	0.00576501	0.00576501	0.00576501	0.00576501	0.00576501	0.00576501	0.00576501	0.0118546	0.0207332	0.0145221	0.0170048	0.0503649	0.0242976	0.0176161	0.01153	0.0129187	0.0163966	0.0174181	0.0142501
PA 16:0_20:4	0.0355596	0.0355596	0.0355596	0.0355596	0.0355596	0.0355596	0.0355596	0.0355596	0.0355596	0.0355596	0.0355596	0.0355596	0.0750818	0.12216	0.108014	0.110124	0.281847	0.144894	0.0991522	0.0748089	0.0711193	0.108984	0.104273	0.0870244
PC 14:0_16:0	0.0285924	0.0285924	0.0285924	0.0285924	0.0285924	0.0285924	0.0285924	0.0285924	0.0285924	0.0285924	0.0285924	0.0285924	0.0750372	0.067915	0.0770078	0.0770165	0.0571848	0.0682177	0.0764522	0.0713552	0.0732828	0.0678724	0.0763609	0.0802764
PC 16:0_17:0	0.0188692	0.0188692	0.0188692	0.0188692	0.0188692	0.0188692	0.0188692	0.0188692	0.0188692	0.0188692	0.0188692	0.0188692	0.0681229	0.0527941	0.0739568	0.0464001	0.0389475	0.0528183	0.0580388	0.0549499	0.0479304	0.0494824	0.0377384	0.065768
PC 16:0_17:1	0.00612365	0.00612365	0.00612365	0.00612365	0.00612365	0.00612365	0.00612365	0.00612365	0.00612365	0.00612365	0.00612365	0.00612365	0.00612365	0.00612365	0.00612365	0.00612365	0.00612365	0.00612365	0.00612365	0.0122473	0.00612365	0.00612365	0.00612365	0.00612365
PC 16:0_18:2_2	0.014775	0.014775	0.014775	0.014775	0.014775	0.014775	0.014775	0.014775	0.014775	0.014775	0.014775	0.014775	0.0445457	0.0384884	0.049695	0.0354275	0.0295499	0.0330212	0.0375961	0.0363907	0.0384219	0.0366014	0.0385695	0.0390983
PC 16:0_22:6_2	0.0241442	0.0241442	0.0241442	0.0241442	0.0241442	0.0241442	0.0241442	0.0241442	0.0241442	0.0241442	0.0241442	0.0241442	0.0656691	0.0694624	0.0743032	0.0504012	0.0664013	0.0563321	0.066454	0.0482884	0.060403	0.0517974	0.0628556	0.064844
PC 16:1_22:6	0.00136568	0.00136568	0.00136568	0.00136568	0.00136568	0.00136568	0.00136568	0.00136568	0.00136568	0.00136568	0.00136568	0.00136568	0.00384861	0.00382553	0.00561506	0.00283118	0.00273137	0.00389649	0.00380827	0.00339875	0.00444096	0.00345114	0.00492692	0.00355305
PC 18:0_20:1	0.0124242	0.0124242	0.0124242	0.0124242	0.0124242	0.0124242	0.0124242	0.0124242	0.0124242	0.0124242	0.0124242	0.0124242	0.0248484	0.0396248	0.0464101	0.0339196	0.0797103	0.0521447	0.0381441	0.0348129	0.0348636	0.039603	0.0363981	0.0370237
PC 18:1_18:1	0.0773711	0.0773711	0.0773711	0.0773711	0.0773711	0.0773711	0.0773711	0.0773711	0.0773711	0.0773711	0.0773711	0.0773711	0.250688	0.203633	0.261509	0.154742	0.275296	0.189981	0.240736	0.205047	0.223631	0.202369	0.257544	0.225706
PC 18:1_18:2	0.0341065	0.0341065	0.0341065	0.0341065	0.0341065	0.0341065	0.0341065	0.0341065	0.0341065	0.0341065	0.0341065	0.0341065	0.0845636	0.0830593	0.0771651	0.0781373	0.073763	0.0682129	0.0929529	0.0803656	0.0862367	0.0752903	0.0862428	0.0830451
PC 20:0_18:1	0.0128775	0.0128775	0.0128775	0.0128775	0.0128775	0.0128775	0.0128775	0.0128775	0.0128775	0.0128775	0.0128775	0.0128775	0.025755	0.0419462	0.0464101	0.0352268	0.0846851	0.0521447	0.0381441	0.0348129	0.0353005	0.039603	0.0407027	0.0370237
PC 20:1_22:6	0.00516906	0.00516906	0.00516906	0.00516906	0.00516906	0.00516906	0.00516906	0.00516906	0.00516906	0.00516906	0.00516906	0.00516906	0.0133048	0.0103381	0.0108049	0.0118462	0.0193878	0.0126336	0.0152625	0.0115606	0.0122508	0.0105822	0.0158266	0.0134845
PC 20:4_22:4	0.00433145	0.00433145	0.00433145	0.00433145	0.00433145	0.00433145	0.00433145	0.00433145	0.00433145	0.00433145	0.00433145	0.00433145	0.0139006	0.0268555	0.0140966	0.00896653	0.0120295	0.0223011	0.0115402	0.00883801	0.012133	0.0086629	0.012703	0.00986323
PC 20:4_22:6	0.00432637	0.00432637	0.00432637	0.00432637	0.00432637	0.00432637	0.00432637	0.00432637	0.00432637	0.00432637	0.00432637	0.00432637	0.0131838	0.0112654	0.015239	0.00898825	0.00997983	0.00986027	0.0148731	0.00865274	0.0108952	0.0121267	0.0138552	0.0146989
PC 23:0_18:1	2.89463	2.89463	2.89463	2.89463	2.89463	2.89463	2.89463	2.89463	2.89463	2.89463	2.89463	2.89463	5.78927	8.28898	9.66789	10.3085	18.1402	9.88087	9.67186	9.16314	7.28403	8.79444	8.89645	9.18283
PC 24:0_18:1	0.282526	0.282526	0.282526	0.282526	0.282526	0.282526	0.282526	0.282526	0.282526	0.282526	0.282526	0.282526	0.565051	0.79192	0.960768	1.00723	1.91829	1.00819	0.993048	0.846463	0.719017	0.921681	0.96576	0.917736
PC 31:1	0.0025696	0.0025696	0.0025696	0.0025696	0.0025696	0.0025696	0.0025696	0.0025696	0.0025696	0.0025696	0.0025696	0.0025696	0.00686832	0.0070449	0.008506	0.00556177	0.00800611	0.00690793	0.00781093	0.00577102	0.00759332	0.00513921	0.00773179	0.00745275
PC 35:0	0.0322832	0.0322832	0.0322832	0.0322832	0.0322832	0.0322832	0.0322832	0.0322832	0.0322832	0.0322832	0.0322832	0.0322832	0.0826006	0.0757825	0.0997328	0.0781063	0.0947349	0.0976583	0.0808145	0.0820246	0.0724547	0.0777747	0.0645663	0.0927812
PC 36:2	0.0435276	0.0435276	0.0435276	0.0435276	0.0435276	0.0435276	0.0435276	0.0435276	0.0435276	0.0435276	0.0435276	0.0435276	0.0870551	0.108694	0.129312	0.0965701	0.168281	0.119054	0.104871	0.120806	0.0965818	0.109887	0.116153	0.108094
PC 36:5	0.00272805	0.00272805	0.00272805	0.00272805	0.00272805	0.00272805	0.00272805	0.00272805	0.00272805	0.00272805	0.00272805	0.00272805	0.00686869	0.00615584	0.0082825	0.00612881	0.00587796	0.0054561	0.0085284	0.00593522	0.00718536	0.00602297	0.00563506	0.00717034
PC 38:5	0.0256617	0.0256617	0.0256617	0.0256617	0.0256617	0.0256617	0.0256617	0.0256617	0.0256617	0.0256617	0.0256617	0.0256617	0.0619116	0.0555143	0.0658915	0.0629781	0.0707262	0.0759134	0.0602298	0.0535995	0.0598134	0.0513233	0.0792124	0.0543781
PC 40:2	0.015401	0.015401	0.015401	0.015401	0.015401	0.015401	0.015401	0.015401	0.015401	0.015401	0.015401	0.015401	0.0308019	0.0341326	0.0419488	0.0350481	0.0592365	0.0395598	0.0392359	0.0337	0.0323204	0.0382855	0.0414743	0.0521947
PC 40:5_2	0.0159095	0.0159095	0.0159095	0.0159095	0.0159095	0.0159095	0.0159095	0.0159095	0.0159095	0.0159095	0.0159095	0.0159095	0.0441863	0.0441837	0.0513347	0.0379489	0.0404754	0.041348	0.036602	0.0412929	0.0318191	0.0409381	0.035537	0.0511043
PC 41:7	0.00109506	0.00109506	0.00109506	0.00109506	0.00109506	0.00109506	0.00109506	0.00109506	0.00109506	0.00109506	0.00109506	0.00109506	0.00109506	0.00109506	0.00109506	0.00219013	0.00109506	0.00109506	0.00109506	0.00109506	0.00109506	0.00109506	0.00109506	0.00109506
PC 42:2	0.00244241	0.00244241	0.00244241	0.00244241	0.00244241	0.00244241	0.00244241	0.00244241	0.00244241	0.00244241	0.00244241	0.00244241	0.00563078	0.00590644	0.00795021	0.00587661	0.0104708	0.00690599	0.00730129	0.00636246	0.00587224	0.00488483	0.00690309	0.00779181
PC 44:2	0.000957153	0.000957153	0.000957153	0.000957153	0.000957153	0.000957153	0.000957153	0.000957153	0.000957153	0.000957153	0.000957153	0.000957153	0.00334283	0.00206727	0.00306185	0.00191431	0.00366962	0.00267622	0.00348087	0.00224771	0.00312666	0.00249839	0.00330769	0.00353342
PE 14:1_22:4	0.00598605	0.00598605	0.00598605	0.00598605	0.00598605	0.00598605	0.00598605	0.00598605	0.00598605	0.00598605	0.00598605	0.00598605	0.016134	0.014502	0.0179173	0.0119721	0.0132717	0.0136264	0.0165356	0.0120015	0.0122009	0.0123457	0.0131744	0.0175096
PE 16:0_18:2	0.560275	0.560275	0.560275	0.560275	0.560275	0.560275	0.560275	0.560275	0.560275	0.560275	0.560275	0.560275	0.560275	0.560275	0.560275	0.560275	0.560275	0.560275	0.560275	0.560275	1.12055	0.560275	0.560275	0.560275
PE 16:0_20:4	0.0637985	0.0637985	0.0637985	0.0637985	0.0637985	0.0637985	0.0637985	0.0637985	0.0637985	0.0637985	0.0637985	0.0637985	0.156934	0.160556	0.146405	0.162185	0.127597	0.14066	0.159795	0.164437	0.159364	0.137814	0.191292	0.147845
PE 16:1_18:2	0.00179517	0.00179517	0.00179517	0.00179517	0.00179517	0.00179517	0.00179517	0.00179517	0.00179517	0.00179517	0.00179517	0.00179517	0.00565804	0.00511019	0.00704579	0.00406205	0.00422646	0.00359033	0.00589033	0.00408862	0.00456474	0.0042372	0.00509948	0.00685447
PE 18:1_20:1	0.66985	0.66985	0.66985	0.66985	0.66985	0.66985	0.66985	0.66985	0.66985	0.66985	0.66985	0.66985	1.97983	2.19833	2.99664	3.10073	5.86079	3.25886	1.89952	1.3397	1.68762	2.46385	2.30278	1.99682
PE 18:2_18:2	0.689489	0.689489	0.689489	0.689489	0.689489	0.689489	0.689489	0.689489	0.689489	0.689489	0.689489	0.689489	1.93167	2.10609	1.83893	2.24284	3.35233	2.35573	2.01813	1.72943	1.46512	2.22602	2.03149	1.37898
PE 22:5_22:6	0.00389993	0.00389993	0.00389993	0.00389993	0.00389993	0.00389993	0.00389993	0.00389993	0.00389993	0.00389993	0.00389993	0.00389993	0.0185206	0.00851135	0.0207738	0.0125819	0.00779986	0.0118009	0.0143586	0.0103971	0.0132204	0.00993168	0.0154524	0.0155957
PE 22:5_22:6_2	0.000732784	0.000732784	0.000732784	0.000732784	0.000732784	0.000732784	0.000732784	0.000732784	0.000732784	0.000732784	0.000732784	0.000732784	0.00238096	0.00254086	0.00228347	0.00146557	0.00263096	0.00169453	0.00165331	0.0017977	0.00223422	0.00177932	0.00198833	0.00202502
PE 3:0_18:0	0.0800423	0.0800423	0.0800423	0.0800423	0.0800423	0.0800423	0.0800423	0.0800423	0.0800423	0.0800423	0.0800423	0.0800423	0.174432	0.195976	0.213989	0.268639	0.160085	0.178941	0.293477	0.204072	0.170761	0.214159	0.185419	0.253738
PE 37:6	0.00295739	0.00295739	0.00295739	0.00295739	0.00295739	0.00295739	0.00295739	0.00295739	0.00295739	0.00295739	0.00295739	0.00295739	0.00668753	0.00987935	0.0100845	0.0069238	0.00664623	0.0068498	0.00741671	0.00591477	0.00786511	0.00717669	0.0110635	0.0091619
PE 38:5	0.0875704	0.0875704	0.0875704	0.0875704	0.0875704	0.0875704	0.0875704	0.0875704	0.0875704	0.0875704	0.0875704	0.0875704	0.275724	0.21595	0.335903	0.177283	0.196047	0.187246	0.242782	0.184523	0.210352	0.175141	0.253393	0.322693
PE 39:6	0.00538246	0.00538246	0.00538246	0.00538246	0.00538246	0.00538246	0.00538246	0.00538246	0.00538246	0.00538246	0.00538246	0.00538246	0.0139395	0.0120709	0.0139415	0.012513	0.0121058	0.0119106	0.0125493	0.0107649	0.0136103	0.0117535	0.0184066	0.0163291
PE 42:4	0.00395353	0.00395353	0.00395353	0.00395353	0.00395353	0.00395353	0.00395353	0.00395353	0.00395353	0.00395353	0.00395353	0.00395353	0.011476	0.010199	0.0151438	0.00793663	0.0145768	0.0104178	0.0124815	0.00829821	0.00790705	0.00801438	0.0104607	0.012089
PE 42:8	0.0207241	0.0207241	0.0207241	0.0207241	0.0207241	0.0207241	0.0207241	0.0207241	0.0207241	0.0207241	0.0207241	0.0207241	0.0726267	0.0606411	0.0822973	0.0565277	0.0414482	0.0471684	0.0601493	0.0487422	0.0599567	0.0436866	0.0656132	0.0759939
PG 18:1_18:1	0.208387	0.208387	0.208387	0.208387	0.208387	0.208387	0.208387	0.208387	0.208387	0.208387	0.208387	0.208387	0.416774	0.644172	0.46435	0.598896	1.43186	0.811411	0.598586	0.521902	0.574741	0.631296	0.585145	0.471074
PG 18:1_20:4	0.00827738	0.00827738	0.00827738	0.00827738	0.00827738	0.00827738	0.00827738	0.00827738	0.00827738	0.00827738	0.00827738	0.00827738	0.0219759	0.0224247	0.0273513	0.017956	0.0165548	0.0205852	0.0248169	0.0174286	0.0190386	0.0193584	0.0202342	0.0253251
PG 22:6_22:6	0.230576	0.230576	0.230576	0.230576	0.230576	0.230576	0.230576	0.230576	0.230576	0.230576	0.230576	0.230576	0.761449	0.740854	0.642453	0.862708	1.15773	0.707772	0.790187	0.642219	1.84696	1.06371	1.68495	0.461152
PI 18:1_20:4	13.2212	13.2212	13.2212	13.2212	13.2212	13.2212	13.2212	13.2212	13.2212	13.2212	13.2212	13.2212	31.1855	37.989	45.0746	40.5536	36.3267	34.4296	35.4366	40.1872	26.4423	36.4673	33.84	41.7892
PS 16:0_20:4	0.00694075	0.00694075	0.00694075	0.00694075	0.00694075	0.00694075	0.00694075	0.00694075	0.00694075	0.00694075	0.00694075	0.00694075	0.0209079	0.0211516	0.0263168	0.0140907	0.0142475	0.0150972	0.0185602	0.0149459	0.0138815	0.0154568	0.0202591	0.0253509
PS 16:0_22:6	0.00216602	0.00216602	0.00216602	0.00216602	0.00216602	0.00216602	0.00216602	0.00216602	0.00216602	0.00216602	0.00216602	0.00216602	0.00978046	0.00915784	0.0105297	0.00481992	0.00433205	0.0050424	0.00823169	0.00597716	0.00743764	0.00686534	0.00774665	0.00838562
PS 16:1_18:1	0.00261941	0.00261941	0.00261941	0.00261941	0.00261941	0.00261941	0.00261941	0.00261941	0.00261941	0.00261941	0.00261941	0.00261941	0.0107472	0.00951311	0.0103325	0.00590107	0.0116079	0.00753211	0.010105	0.00523881	0.00835756	0.00743707	0.00938243	0.00915655
PS 18:0_20:4	0.0167016	0.0167016	0.0167016	0.0167016	0.0167016	0.0167016	0.0167016	0.0167016	0.0167016	0.0167016	0.0167016	0.0167016	0.036488	0.0397935	0.0530534	0.0334031	0.0546622	0.0403249	0.0381754	0.0371447	0.0361153	0.0395979	0.047394	0.0475053
PS 34:1	0.00692612	0.00692612	0.00692612	0.00692612	0.00692612	0.00692612	0.00692612	0.00692612	0.00692612	0.00692612	0.00692612	0.00692612	0.0239355	0.0184296	0.0251526	0.0181707	0.0138522	0.0176063	0.0223064	0.0163448	0.0211771	0.0169626	0.0220057	0.026995
PS 36:3	0.0067181	0.0067181	0.0067181	0.0067181	0.0067181	0.0067181	0.0067181	0.0067181	0.0067181	0.0067181	0.0067181	0.0067181	0.0067181	0.0134362	0.0067181	0.0067181	0.0067181	0.0067181	0.0067181	0.0067181	0.0067181	0.0067181	0.0067181	0.0067181
PS 38:2	0.0140814	0.0140814	0.0140814	0.0140814	0.0140814	0.0140814	0.0140814	0.0140814	0.0140814	0.0140814	0.0140814	0.0140814	0.0598497	0.0384041	0.0639729	0.0334305	0.0295455	0.0340465	0.049456	0.0281627	0.0470403	0.0326798	0.0490261	0.06079
PS 42:1	0.00103432	0.00103432	0.00103432	0.00103432	0.00103432	0.00103432	0.00103432	0.00103432	0.00103432	0.00103432	0.00103432	0.00103432	0.00442834	0.0036989	0.0053494	0.00331556	0.00550789	0.00341957	0.00443429	0.00308764	0.00374969	0.00206864	0.00429274	0.00474736
PS 42:10	0.00148917	0.00148917	0.00148917	0.00148917	0.00148917	0.00148917	0.00148917	0.00148917	0.00148917	0.00148917	0.00148917	0.00148917	0.00589562	0.00577506	0.00507694	0.00351357	0.00297833	0.00352833	0.00521059	0.00314224	0.00447641	0.00409031	0.00418535	0.00563562
PS 42:6	0.00145102	0.00145102	0.00145102	0.00145102	0.00145102	0.00145102	0.00145102	0.00145102	0.00145102	0.00145102	0.00145102	0.00145102	0.00503759	0.0032861	0.00482897	0.00290203	0.00538034	0.00406846	0.00474699	0.00350814	0.00487138	0.0031774	0.00357244	0.00436011
PS 42:9	0.0211598	0.0211598	0.0211598	0.0211598	0.0211598	0.0211598	0.0211598	0.0211598	0.0211598	0.0211598	0.0211598	0.0211598	0.0750592	0.0528362	0.079566	0.0436954	0.0468648	0.0459673	0.0594414	0.0448725	0.0539027	0.0423197	0.0659958	0.078789
PS 44:9	0.00685072	0.00685072	0.00685072	0.00685072	0.00685072	0.00685072	0.00685072	0.00685072	0.00685072	0.00685072	0.00685072	0.00685072	0.0205441	0.0190799	0.0267892	0.0149026	0.0161395	0.0176368	0.0199957	0.0137014	0.015101	0.0159782	0.0210338	0.0236931
SM d17:0_20:1	0.00897042	0.00897042	0.00897042	0.00897042	0.00897042	0.00897042	0.00897042	0.00897042	0.00897042	0.00897042	0.00897042	0.00897042	0.0204844	0.0314884	0.0451475	0.0179408	0.0304064	0.0267439	0.0227998	0.0233282	0.0184344	0.0310657	0.0257353	0.0286789
SM d33:1	0.00109505	0.00109505	0.00109505	0.00109505	0.00109505	0.00109505	0.00109505	0.00109505	0.00109505	0.00109505	0.00109505	0.00109505	0.00346271	0.00438036	0.00479074	0.00230187	0.00313882	0.00362864	0.00297444	0.0021901	0.00273057	0.00365555	0.00300639	0.00289264
SM d38:1_2	0.0665187	0.0665187	0.0665187	0.0665187	0.0665187	0.0665187	0.0665187	0.0665187	0.0665187	0.0665187	0.0665187	0.0665187	0.0665187	0.166553	0.0665187	0.0665187	0.0665187	0.0665187	0.0665187	0.0665187	0.0665187	0.162491	0.0665187	0.133037
SM d38:2	0.0112159	0.0112159	0.0112159	0.0112159	0.0112159	0.0112159	0.0112159	0.0112159	0.0112159	0.0112159	0.0112159	0.0112159	0.0112159	0.0112159	0.0112159	0.0112159	0.0112159	0.0112159	0.0112159	0.0112159	0.0112159	0.0112159	0.0224317	0.0112159
SQDG 18:1_22:6	0.0632769	0.0632769	0.0632769	0.0632769	0.0632769	0.0632769	0.0632769	0.0632769	0.0632769	0.0632769	0.0632769	0.0632769	0.0632769	0.189126	0.169981	0.268887	0.0632769	0.128226	0.17082	0.126554	0.0632769	0.0632769	0.336308	0.28682
TG 14:0_16:0_18:1	0.00143872	0.00143872	0.00143872	0.00143872	0.00143872	0.00143872	0.00143872	0.00143872	0.00143872	0.00143872	0.00143872	0.00143872	0.00369046	0.00449497	0.00331359	0.00420788	0.00310797	0.00533855	0.00424717	0.0088023	0.00287745	0.00596272	0.00484943	0.00497229
TG 16:0_18:0_18:0	0.00273167	0.00273167	0.00273167	0.00273167	0.00273167	0.00273167	0.00273167	0.00273167	0.00273167	0.00273167	0.00273167	0.00273167	0.00830459	0.00825501	0.0069181	0.00553784	0.00574856	0.00594381	0.00557222	0.00546334	0.00659625	0.00625508	0.00927672	0.00760826
TG 16:0_18:0_18:1_2	0.00701854	0.00701854	0.00701854	0.00701854	0.00701854	0.00701854	0.00701854	0.00701854	0.00701854	0.00701854	0.00701854	0.00701854	0.0176501	0.0197571	0.0163592	0.0179424	0.0149028	0.0215689	0.0140371	0.0206926	0.0195688	0.0249716	0.020034	0.0192134
TG 18:0_18:0_18:1	0.00212284	0.00212284	0.00212284	0.00212284	0.00212284	0.00212284	0.00212284	0.00212284	0.00212284	0.00212284	0.00212284	0.00212284	0.00581572	0.00686928	0.00648694	0.00676929	0.00668239	0.00712799	0.00424567	0.00563096	0.00540343	0.00665889	0.00830444	0.00756704
TG 18:1_18:2_18:2	0.00143808	0.00143808	0.00143808	0.00143808	0.00143808	0.00143808	0.00143808	0.00143808	0.00143808	0.00143808	0.00143808	0.00143808	0.00289298	0.0110551	0.00465889	0.00306884	0.00387081	0.00566306	0.00287615	0.00594455	0.0164187	0.0324741	0.0144643	0.00645241
TG 52:3	0.00298485	0.00298485	0.00298485	0.00298485	0.00298485	0.00298485	0.00298485	0.00298485	0.00298485	0.00298485	0.00298485	0.00298485	0.00915958	0.020593	0.00969557	0.012202	0.00822246	0.0171484	0.0059697	0.0229164	0.0347244	0.0492269	0.0200772	0.0139707
TG 52:4	0.00144824	0.00144824	0.00144824	0.00144824	0.00144824	0.00144824	0.00144824	0.00144824	0.00144824	0.00144824	0.00144824	0.00144824	0.00291401	0.00900058	0.00490456	0.00389469	0.00359722	0.00703643	0.00289647	0.00918314	0.0136118	0.0254614	0.0116296	0.00715904
TG 60:12	0.000981094	0.000981094	0.000981094	0.000981094	0.000981094	0.000981094	0.000981094	0.000981094	0.000981094	0.000981094	0.000981094	0.000981094	0.00347319	0.00338725	0.00196219	0.00273079	0.00393117	0.00352359	0.00255663	0.0028592	0.00447838	0.00477595	0.00447049	0.00349864

[truncated: 5 more sheets: S11, S12, S13, S14, S15]
